# Supplementary material for: Integrated analysis of microRNA and mRNA expression and association with HIF binding reveals the complexity of microRNA expression regulation under hypoxia
Source: Mol Cancer. 2014 Feb 11;13:28. doi: 10.1186/1476-4598-13-28 (PMC3928101; doi:10.1186/1476-4598-13-28)
Supplement: Additional file 1: Table S1 — MicroRNA-seq analysis. Details are given on analysis output at different stages. Table S2. MicroRNAs detected in MCF-7 cells by microRNA-seq. Table S3. MicroRNAs commonly detected by microRNA-seq and Agilent microRNA arrays in MCF-7 cells. Table S4. MicroRNA-seq data for microRNAs within 50 kb distance of a HIF binding site. MicroRNA microarray data also included when available. Table S5. microRNAs encoded within a coding gene sequence. MicroRNA-seq and mRNA microarray expression of corresponding host gene are provided. Table S6. Pairs of microRNA and host genes with low coordination between their expression. Information included as in Table S5. Significant up- and down-regulations are highlighted in red and green, respectively. Table S7. Microarray data for genes involved in the microRNA processing. Table S8. Primers used in the qPCR analysis. Table S9. Comparison with previously published hypoxia studies. MicroRNAs reported to be hypoxia regulated in previous studies are included and the regulation is indicated as up (up-regulated) and down (down-regulated). Concerning our data, microRNAs found significantly regulated at each hypoxia time (16 h, 32 h and 48 h) as well as HIF binding sites identified are included. Hypoxic regulations determined by qPCR are indicated with*. Table S10. Differential expression of microRNA processing genes using data from published hypoxia studies. Significant changes are highlighted in red (for up-regulation) and green (for down-regulation). Note for Table S2 to Table S7 and Table S10: microRNAs or genes (Tables S7 and S10) are arranged in numerical order for ease of reading. Fold change (FC) in linear scale (hypoxia vs normoxia) and p-value before and after multiple test correction (adj.p-val) are shown for each microRNA and gene at each hypoxia time (only adj.p-val is shown in Table S10). Platform specified at the header when multiple data sets are displayed in the same table. [file 1476-4598-13-28-S1.xlsx]

## Sheet: Camps_TableS1
Supplementary table 1
Samples	Total reads	Filtered reads (Percentage)	Discarded Reads	Reason for discard	Reads with length >=18 and <=26 (Percentage)	Unique reads with length >=18 and <=26	Mapped Reads (Percentage)	Uniquely Mapped Reads (Percentage)	Reads mapped to annotations	miRNAs	snoRNAs	snRNAs	aa tRNAs	other tRNAs	Mt tRNAs	rRNAs	lincRNAs	miscRNAs	Protein coding exons	Processed transcripts	pseudogenes	LINEs	SINEs	LTRs	typeII transposons	satellites	RNA repeats	Tandem repeats	Dust repeats	Other repeats	unknown repeats	unannotated reads
Normoxia_1	34686701	34438701	248000	5’ adapter contamination	29635929	547621	29385222	23909122	28815774	27815585	48586	6305	246327	3524	17696	26908	8429	6088	182129	2798	29131	148754	53180	50387	23912	2240	129887	6464	7067	73	284	569448
		0.993			0.854		0.992	0.814	0.98	0.947
Normoxia_2	34822872	34650721	172151	5’ adapter contamination	29426359	517522	29167201	23579684	28596860	27649894	48563	5678	217440	2876	14114	27625	7835	6830	169148	2892	24028	139214	56919	46999	27085	2337	131685	6838	8452	80	305	570341
		0.995			0.845		0.991	0.808	0.98	0.948
Hypoxia16h_1	35404191	35341087	63104	5’ adapter contamination	27734354	386975	27474739	20613717	27104140	26403328	35607	4665	111334	1909	20984	22257	4076	3570	135506	2030	27546	88385	34617	37314	14218	1226	144666	6407	4255	22	195	370599
		0.998			0.783		0.991	0.75	0.987	0.961
Hypoxia16h_2	34606487	33637763	968724	5’ adapter contamination	26028643	414098	25744322	21595045	25321635	24438568	43266	6228	185824	2403	15955	25642	4677	4524	153044	2233	30655	123698	39143	38352	15634	1440	179892	6275	3844	36	276	422687
		0.972			0.752		0.989	0.839	0.984	0.949
Hypoxia32h_1	32865278	31999502	865776	5’ adapter contamination	28207817	399245	28071881	23991035	27752369	26882015	57745	8469	196046	2741	16052	24691	5391	6131	159866	2343	26727	146555	32156	22502	11084	1719	142169	4324	3390	37	196	319512
		0.974			0.858		0.995	0.855	0.989	0.958
Hypoxia32h_2	32347671	31973073	374598	5’ adapter contamination	27759005	465009	27603963	23700411	27216655	26073436	73966	14165	271439	4225	18464	29906	6935	10008	223795	3319	33196	144985	42696	26366	12278	2826	214067	5549	4783	41	189	387308
		0.988			0.858		0.994	0.859	0.986	0.945
Hypoxia48h_1	33472066	32697923	774143	5’ adapter contamination	28223570	402911	28088690	23944736	27777285	26862797	58836	10524	181404	3055	24460	30282	5787	8513	171234	2483	37889	146371	31258	20238	10128	1017	163359	4014	3369	47	201	311405
		0.977			0.843		0.995	0.852	0.989	0.956
Hypoxia48h_2	33354166	32927136	427030	5’ adapter contamination	29190699	452885	28995128	24635577	28666425	27742740	63534	9812	186634	3123	19982	29022	5682	8684	169543	2541	32062	142403	35223	24894	11342	1198	170020	4379	3348	31	209	328703
		0.987			0.875		0.993	0.85	0.989	0.957

## Sheet: Camps_TableS2
Supplementary table 2
miRNAs	logConc Hyp16h	FC Hyp16h	p-val_16h	adj.p-val_16h	logConc Hyp32h	FC Hyp32h	p-val_32h	adj.p-val_32h	logConc Hyp48h	FC Hyp48h	p-val_48h	adj.p-val_48h
hsa-let-7a-5p	-2.90896	1.33714	0.236666	0.888381	-2.90896	0.776899	0.303636	0.494268	-2.90896	0.994856	0.983212	0.988485
hsa-let-7a-3p	-10.5127	0.73917	0.216921	0.877037	-10.5127	0.698373	0.142812	0.288492	-10.5127	0.79498	0.348047	0.52259
hsa-let-7b-5p	-3.91227	0.788532	0.322352	0.904641	-3.91227	0.908183	0.688004	0.827379	-3.91227	1.00473	0.984307	0.988485
hsa-let-7b-3p	-12.699	0.597734	0.0589107	0.673456	-12.699	0.514222	0.0154031	0.0727392	-12.699	0.651912	0.114859	0.241545
hsa-let-7c-5p	-5.82533	0.930749	0.752149	0.962874	-5.82533	0.872328	0.547909	0.720366	-5.82533	0.939794	0.784658	0.888926
hsa-let-7d-5p	-6.34432	1.482	0.137319	0.840474	-6.34432	0.648309	0.101904	0.227811	-6.34432	0.812255	0.431187	0.607526
hsa-let-7d-3p	-9.31674	0.666555	0.0685401	0.703585	-9.31674	1.09686	0.676625	0.82519	-9.31674	1.55203	0.048093	0.138233
hsa-let-7e-5p	-5.75703	1.46382	0.121261	0.801004	-5.75703	0.722081	0.185133	0.352735	-5.75703	0.758728	0.260869	0.426029
hsa-let-7e-3p	-12.8463	1.08538	0.746987	0.962874	-12.8463	0.799164	0.384396	0.573743	-12.8463	1.00439	0.986304	0.988485
hsa-let-7f-5p	-3.21521	1.61733	0.0616648	0.674291	-3.21521	0.773275	0.31597	0.50313	-3.21521	0.953369	0.852063	0.915785
hsa-let-7f-1-3p	-12.4029	0.584376	0.040792	0.618581	-12.4029	0.367402	0.000205496	0.00395237	-12.4029	0.458698	0.00344543	0.0228033
hsa-let-7f-2-3p	-13.6701	1.00727	0.979226	0.990756	-13.6701	1.07893	0.782213	0.890434	-13.6701	0.719189	0.255145	0.419405
hsa-let-7g-5p	-5.79195	1.51884	0.0930388	0.720598	-5.79195	0.828218	0.4475	0.631256	-5.79195	0.877349	0.597817	0.742474
hsa-let-7g-3p	-13.1166	0.89955	0.720297	0.962874	-13.1166	0.556619	0.0534965	0.156446	-13.1166	0.437715	0.00792294	0.0369004
hsa-let-7i-5p	-6.38197	1.35076	0.214827	0.877037	-6.38197	0.978495	0.928405	0.956869	-6.38197	0.964934	0.882716	0.93475
hsa-let-7i-3p	-12.38	1.12606	0.643586	0.962874	-12.38	1.21404	0.448028	0.631256	-12.38	0.918196	0.741554	0.857475
hsa-miR-1	-12.6134	1.86284	0.0239101	0.480646	-12.6134	2.25354	0.00297158	0.0262229	-12.6134	3.12053	3.11814e-05	0.000681923
hsa-miR-100-5p	-14.1742	1.78674	0.143134	0.840474	-14.1742	1.75022	0.155546	0.304434	-14.1742	3.24237	0.00184649	0.0149787
hsa-miR-101-3p	-6.04399	1.02308	0.924437	0.980995	-6.04399	1.78538	0.0167192	0.0729721	-6.04399	1.5132	0.0862171	0.199849
hsa-miR-101-5p	-13.1985	1.21429	0.481289	0.927542	-13.1985	1.71375	0.044976	0.139648	-13.1985	1.81748	0.0264247	0.0910385
hsa-miR-103a-3p	-4.52941	1.3897	0.178162	0.866492	-4.52941	0.878339	0.594894	0.755636	-4.52941	0.804145	0.371886	0.548664
hsa-miR-103a-2-5p	-13.4	1.52277	0.143679	0.840474	-13.4	0.707174	0.24933	0.432459	-13.4	0.571903	0.0713063	0.179236
hsa-miR-105-5p	-12.5214	1.12945	0.6215	0.962874	-12.5214	1.50803	0.0914608	0.211031	-12.5214	1.30342	0.279886	0.449785
hsa-miR-106a-5p	-11.3034	0.700161	0.124211	0.801004	-11.3034	0.553012	0.0111627	0.0591033	-11.3034	0.639936	0.0549143	0.152847
hsa-miR-106b-5p	-5.97562	0.880271	0.550674	0.955522	-5.97562	0.921889	0.703453	0.834521	-5.97562	0.89485	0.603114	0.745919
hsa-miR-106b-3p	-9.21771	1.10172	0.709546	0.962874	-9.21771	2.14833	0.00361595	0.0293359	-9.21771	1.9416	0.0113567	0.0480034
hsa-miR-107	-9.59114	1.37192	0.227836	0.877037	-9.59114	0.766137	0.309847	0.501135	-9.59114	0.685706	0.151124	0.290194
hsa-miR-10a-5p	-9.89928	0.957693	0.86192	0.962874	-9.89928	1.79256	0.0193298	0.0784104	-9.89928	2.8691	3.09083e-05	0.000681923
hsa-miR-10b-5p	-14.2308	0.681911	0.284003	0.904641	-14.2308	1.26943	0.462574	0.643372	-14.2308	1.44537	0.254086	0.419405
hsa-miR-1179	-13.1104	1.33452	0.2895	0.904641	-13.1104	0.581318	0.0581973	0.165371	-13.1104	0.739986	0.285935	0.458042
hsa-miR-1180-3p	-11.6331	0.838119	0.458154	0.924154	-11.6331	0.832025	0.439304	0.625977	-11.6331	0.646931	0.0696967	0.177058
hsa-miR-1224-5p	-11.881	0.767749	0.386639	0.904641	-11.881	1.03395	0.912293	0.956869	-11.881	0.797847	0.458948	0.635472
hsa-miR-1226-3p	-14.3282	0.743049	0.365947	0.904641	-14.3282	0.688705	0.256089	0.441263	-14.3282	0.809412	0.515599	0.677144
hsa-miR-1246	-13.8749	1.53186	0.26282	0.904641	-13.8749	5.08379	1.34861e-06	8.47939e-05	-13.8749	3.87014	8.56324e-05	0.00134603
hsa-miR-1247-5p	-12.0424	1.16413	0.555056	0.955522	-12.0424	1.73417	0.0313888	0.108887	-12.0424	1.41221	0.178629	0.329122
hsa-miR-1251-5p	-11.8973	0.809789	0.355765	0.904641	-11.8973	0.756901	0.223174	0.39949	-11.8973	0.940953	0.789065	0.891082
hsa-miR-1252-5p	-13.8762	0.90817	0.748266	0.962874	-13.8762	1.29995	0.359889	0.551329	-13.8762	0.995714	0.988485	0.988485
hsa-miR-1254	-11.2566	0.874568	0.563793	0.957594	-11.2566	1.26047	0.316081	0.50313	-11.2566	1.25335	0.328633	0.502677
hsa-miR-1255a	-12.5947	1.65833	0.0453668	0.618581	-12.5947	0.95644	0.862622	0.939176	-12.5947	1.28198	0.329788	0.502677
hsa-miR-1257	-13.7642	0.610399	0.0882349	0.720598	-13.7642	0.485084	0.0141826	0.0699398	-13.7642	0.337731	0.000499101	0.00534144
hsa-miR-125a-3p	-10.593	1.44851	0.123979	0.801004	-10.593	1.10041	0.690853	0.827379	-10.593	1.05668	0.818873	0.897371
hsa-miR-125a-5p	-6.27695	1.00566	0.980907	0.990756	-6.27695	1.8052	0.0129202	0.0654261	-6.27695	2.21834	0.000855135	0.00796542
hsa-miR-125b-5p	-9.38631	0.924933	0.720215	0.962874	-9.38631	1.22675	0.348204	0.540576	-9.38631	1.05396	0.809302	0.897371
hsa-miR-125b-2-3p	-9.67501	1.06958	0.76011	0.962874	-9.67501	1.69446	0.0171027	0.073527	-9.67501	1.26043	0.293664	0.464506
hsa-miR-126-3p	-7.63795	1.1697	0.475165	0.926177	-7.63795	1.02325	0.916566	0.956869	-7.63795	1.1167	0.614991	0.756334
hsa-miR-126-5p	-9.23729	0.875544	0.558496	0.955522	-9.23729	0.642847	0.0527427	0.155144	-9.23729	0.735064	0.176284	0.325996
hsa-miR-1260a	-13.2449	0.593184	0.0645625	0.676562	-13.2449	0.246829	4.9064e-06	0.000224356	-13.2449	0.445018	0.00521404	0.0279007
hsa-miR-1260b	-12.8682	0.523704	0.0248445	0.480646	-12.8682	0.19332	1.43875e-07	1.20615e-05	-12.8682	0.375757	0.000917908	0.00839468
hsa-miR-1266-5p	-10.3435	1.32746	0.259568	0.904641	-10.3435	1.8041	0.0192646	0.0784104	-10.3435	1.765	0.0242172	0.0857833
hsa-miR-1269a	-11.2162	1.18411	0.491423	0.939871	-11.2162	2.42596	0.00032558	0.00545888	-11.2162	1.94156	0.00693954	0.0332437
hsa-miR-1275	-13.1907	0.981099	0.942647	0.983717	-13.1907	0.460751	0.00549307	0.0385093	-13.1907	0.251781	4.59254e-06	0.000158578
hsa-miR-1276	-10.9571	1.03817	0.883019	0.962874	-10.9571	1.86288	0.0146319	0.070768	-10.9571	2.09665	0.00376309	0.0236604
hsa-miR-1277-3p	-12.2474	1.76872	0.0908614	0.720598	-12.2474	0.543724	0.0766488	0.192534	-12.2474	0.488281	0.0386362	0.119963
hsa-miR-1278	-14.032	0.756374	0.398691	0.912621	-14.032	1.08611	0.792293	0.890434	-14.032	1.48554	0.195548	0.347564
hsa-miR-128-3p	-8.99492	0.873525	0.536389	0.955522	-8.99492	0.81873	0.360685	0.551329	-8.99492	0.87839	0.55326	0.709923
hsa-miR-1283	-11.7924	0.892891	0.645252	0.962874	-11.7924	0.508485	0.00698071	0.0433494	-11.7924	0.581509	0.0299198	0.0983638
hsa-miR-1285-3p	-13.1415	1.37557	0.250989	0.904641	-13.1415	2.02267	0.00942336	0.0532579	-13.1415	1.35936	0.269668	0.434835
hsa-miR-1287-5p	-11.055	1.10581	0.654496	0.962874	-11.055	1.43011	0.110789	0.241242	-11.055	1.48188	0.0798921	0.192276
hsa-miR-1291	-13.9821	1.12793	0.733841	0.962874	-13.9821	2.03178	0.0323477	0.110478	-13.9821	1.95251	0.0456631	0.136718
hsa-miR-1292-5p	-10.8919	1.02073	0.927493	0.982166	-10.8919	0.970129	0.893008	0.94838	-10.8919	0.804814	0.337349	0.512394
hsa-miR-1293	-12.2891	0.897767	0.651534	0.962874	-12.2891	0.962659	0.872703	0.941995	-12.2891	1.06099	0.803045	0.897371
hsa-miR-129-5p	-12.352	0.935413	0.797847	0.962874	-12.352	1.8475	0.0162324	0.0727392	-12.352	1.47755	0.128341	0.259259
hsa-miR-1296-5p	-12.6104	0.809295	0.461665	0.924154	-12.6104	0.688591	0.196396	0.368481	-12.6104	0.557181	0.0459662	0.136811
hsa-miR-1301-3p	-10.7272	1.12163	0.624426	0.962874	-10.7272	0.765942	0.257038	0.441263	-10.7272	0.601694	0.0319652	0.102411
hsa-miR-1305	-12.1228	1.03673	0.879668	0.962874	-12.1228	1.28105	0.295055	0.489433	-12.1228	0.986014	0.952965	0.980249
hsa-miR-1306-3p	-14.3111	0.566738	0.111748	0.801004	-14.3111	0.971511	0.9296	0.956869	-14.3111	1.01618	0.961134	0.98155
hsa-miR-1307-3p	-8.08417	0.836014	0.433589	0.924154	-8.08417	0.928072	0.743997	0.866274	-8.08417	0.837675	0.438701	0.61467
hsa-miR-130b-3p	-9.30621	1.08435	0.720487	0.962874	-9.30621	0.96532	0.876066	0.942094	-9.30621	0.956537	0.844372	0.911415
hsa-miR-130b-5p	-12.306	1.06309	0.815518	0.962874	-12.306	0.830558	0.482158	0.659037	-12.306	1.40567	0.191574	0.344149
hsa-miR-132-3p	-9.2011	1.04106	0.859821	0.962874	-9.2011	1.42976	0.117315	0.251105	-9.2011	1.79559	0.0106564	0.0462082
hsa-miR-132-5p	-13.4042	1.30292	0.385278	0.904641	-13.4042	0.569663	0.0798829	0.196966	-13.4042	0.794292	0.464224	0.639739
hsa-miR-1323	-14.2276	0.95798	0.893683	0.967179	-14.2276	1.08585	0.79307	0.890434	-14.2276	0.703596	0.296895	0.468145
hsa-miR-134-5p	-13.9851	1.13278	0.692346	0.962874	-13.9851	1.52352	0.166217	0.322807	-13.9851	0.571585	0.104855	0.230316
hsa-miR-1343-3p	-13.5603	1.33472	0.317165	0.904641	-13.5603	1.41085	0.227623	0.404577	-13.5603	1.81762	0.0338803	0.107181
hsa-miR-135a-5p	-10.6836	1.39996	0.229624	0.877037	-10.6836	0.546264	0.0325064	0.110478	-10.6836	0.602186	0.0722492	0.179236
hsa-miR-135b-5p	-10.7274	1.24911	0.365303	0.904641	-10.7274	0.70288	0.153363	0.303707	-10.7274	0.622374	0.0557245	0.153166
hsa-miR-135b-3p	-11.5869	1.15857	0.513202	0.955522	-11.5869	1.45745	0.0930363	0.211606	-11.5869	1.43496	0.107832	0.234803
hsa-miR-138-5p	-14.082	0.976299	0.941907	0.983717	-14.082	1.28279	0.428526	0.615853	-14.082	1.72709	0.0755319	0.182657
hsa-miR-140-3p	-7.18144	1.11422	0.65978	0.962874	-7.18144	2.20805	0.00144893	0.0169491	-7.18144	2.00653	0.00498863	0.0272748
hsa-miR-140-5p	-9.80945	1.30787	0.233702	0.883852	-9.80945	1.11999	0.614813	0.769456	-9.80945	1.02028	0.92898	0.963457
hsa-miR-141-3p	-4.97803	1.5739	0.112636	0.801004	-4.97803	0.633442	0.110281	0.241242	-4.97803	0.654035	0.137307	0.268738
hsa-miR-141-5p	-8.57775	1.25569	0.295249	0.904641	-8.57775	1.7792	0.00841827	0.0492371	-8.57775	1.93382	0.00261449	0.018787
hsa-miR-142-3p	-12.9377	0.989482	0.966279	0.990756	-12.9377	0.756735	0.271739	0.457139	-12.9377	0.940568	0.807351	0.897371
hsa-miR-143-3p	-9.13201	1.82283	0.00558284	0.255288	-9.13201	2.79982	2.69786e-06	0.000135702	-9.13201	1.89803	0.003125	0.0212415
hsa-miR-144-5p	-13.4387	1.14756	0.618109	0.962874	-13.4387	0.980442	0.943489	0.962626	-13.4387	1.01081	0.969322	0.984987
hsa-miR-145-5p	-13.9537	0.774836	0.430125	0.924154	-13.9537	0.703569	0.279168	0.466516	-13.9537	0.578567	0.102754	0.227688
hsa-miR-145-3p	-13.9036	0.163976	2.22497e-08	5.5958e-06	-13.9036	0.129709	6.71692e-10	1.23247e-07	-13.9036	0.103084	6.90097e-11	1.15706e-08
hsa-miR-146a-5p	-14.4627	0.341456	0.00830413	0.298356	-14.4627	0.930595	0.834402	0.916742	-14.4627	1.04058	0.907596	0.951085
hsa-miR-146b-5p	-7.65827	1.251	0.359698	0.904641	-7.65827	1.80945	0.0159075	0.0727392	-7.65827	2.42848	0.000348033	0.00397865
hsa-miR-148a-3p	-6.73423	1.12218	0.629276	0.962874	-6.73423	1.41052	0.150604	0.301661	-6.73423	1.56247	0.0626211	0.166658
hsa-miR-148a-5p	-10.3449	1.02261	0.923091	0.980995	-10.3449	1.76468	0.0143927	0.0702869	-10.3449	2.37721	0.000211615	0.00280111
hsa-miR-148b-3p	-6.63926	1.18253	0.460512	0.924154	-6.63926	1.3274	0.212991	0.39045	-6.63926	1.01228	0.957137	0.98155
hsa-miR-148b-5p	-9.6289	1.03606	0.868899	0.962874	-9.6289	1.07776	0.727107	0.853118	-9.6289	1.16338	0.480817	0.649884
hsa-miR-149-5p	-7.74825	0.903265	0.640424	0.962874	-7.74825	1.09048	0.690822	0.827379	-7.74825	0.835635	0.409942	0.590033
hsa-miR-149-3p	-11.3644	0.664522	0.0770427	0.720598	-11.3644	0.629854	0.0456088	0.139885	-11.3644	0.242666	5.97155e-09	7.50922e-07
hsa-miR-151a-3p	-5.73844	1.3541	0.267672	0.904641	-5.73844	2.46938	0.00112243	0.0144764	-5.73844	2.33903	0.00215418	0.0168795
hsa-miR-151a-5p	-8.52814	1.0713	0.767781	0.962874	-8.52814	0.757755	0.235158	0.413795	-8.52814	0.680882	0.100529	0.225002
hsa-miR-151b	-11.4463	1.22225	0.396742	0.912621	-11.4463	1.21492	0.410752	0.597134	-11.4463	1.0328	0.891885	0.942475
hsa-miR-152-3p	-8.51777	1.22345	0.382875	0.904641	-8.51777	1.67913	0.0255583	0.0945283	-8.51777	1.5228	0.069532	0.177058
hsa-miR-155-5p	-12.656	1.87648	0.0149209	0.408812	-12.656	1.62829	0.0599955	0.166728	-12.656	2.0883	0.00433407	0.0254537
hsa-miR-15a-5p	-8.1629	0.92359	0.710432	0.962874	-8.1629	0.89226	0.59444	0.755636	-8.1629	0.918516	0.691371	0.816337
hsa-miR-15b-5p	-9.37961	1.40562	0.162748	0.86171	-9.37961	0.781786	0.312803	0.502684	-9.37961	0.901617	0.670729	0.803129
hsa-miR-15b-3p	-12.4549	0.916095	0.76476	0.962874	-12.4549	0.315305	0.000182644	0.00395237	-12.4549	0.355534	0.000743204	0.00747663
hsa-miR-16-5p	-7.91955	1.55993	0.0516445	0.634757	-7.91955	0.963189	0.869113	0.941995	-7.91955	1.0388	0.867174	0.924128
hsa-miR-16-1-3p	-12.3555	1.32799	0.292259	0.904641	-12.3555	0.668009	0.141481	0.286955	-12.3555	0.456831	0.00537411	0.0283993
hsa-miR-16-2-3p	-11.1969	1.05226	0.839796	0.962874	-11.1969	0.787041	0.34377	0.537007	-11.1969	0.832604	0.468809	0.642536
hsa-miR-17-5p	-7.15978	1.02892	0.894112	0.967179	-7.15978	0.823864	0.366121	0.554696	-7.15978	0.945538	0.793775	0.893218
hsa-miR-17-3p	-9.96666	0.931862	0.754198	0.962874	-9.96666	1.06117	0.792071	0.890434	-9.96666	0.903429	0.652394	0.790733
hsa-miR-181a-5p	-5.58507	1.14164	0.53772	0.955522	-5.58507	1.56535	0.0378169	0.121935	-5.58507	1.76825	0.00841203	0.0388188
hsa-miR-181a-3p	-8.57714	0.72791	0.158973	0.859036	-8.57714	1.16406	0.499508	0.67723	-8.57714	1.41874	0.12072	0.248661
hsa-miR-181a-2-3p	-10.9609	1.01412	0.957678	0.989141	-10.9609	1.58344	0.0816175	0.199289	-10.9609	2.94259	5.5081e-05	0.00095537
hsa-miR-181b-5p	-5.83304	1.05109	0.832135	0.962874	-5.83304	1.83383	0.0104554	0.0565489	-5.83304	2.09386	0.00187606	0.0149787
hsa-miR-181c-5p	-10.4339	1.1269	0.586187	0.962874	-10.4339	1.22862	0.348009	0.540576	-10.4339	1.19742	0.411733	0.590033
hsa-miR-181c-3p	-11.0215	1.11525	0.633884	0.962874	-11.0215	1.88945	0.00547519	0.0385093	-11.0215	1.84277	0.00764561	0.0359905
hsa-miR-181d-5p	-9.57875	0.863453	0.533563	0.955522	-9.57875	1.26295	0.321943	0.510843	-9.57875	1.22112	0.396674	0.575005
hsa-miR-182-5p	-3.90605	1.26672	0.375025	0.904641	-3.90605	1.8213	0.0253762	0.0945283	-3.90605	2.15586	0.00435414	0.0254537
hsa-miR-182-3p	-13.8462	0.564849	0.0630252	0.674504	-13.8462	0.478056	0.017817	0.0750129	-13.8462	0.468254	0.0160922	0.0627471
hsa-miR-183-5p	-4.75393	1.10939	0.665482	0.962874	-4.75393	1.5437	0.0715909	0.184473	-4.75393	1.7372	0.0222344	0.0828439
hsa-miR-183-3p	-8.67373	0.843105	0.435226	0.924154	-8.67373	0.972678	0.899131	0.949579	-8.67373	1.12412	0.592466	0.740318
hsa-miR-184	-11.2012	1.48422	0.0807524	0.720598	-11.2012	1.95457	0.00307058	0.0265365	-11.2012	1.50968	0.0685681	0.177058
hsa-miR-185-5p	-7.75759	1.05698	0.824684	0.962874	-7.75759	0.62561	0.0620051	0.170859	-7.75759	0.525413	0.0107586	0.046253
hsa-miR-185-3p	-11.4651	0.905879	0.683213	0.962874	-11.4651	0.816141	0.402157	0.588754	-11.4651	0.640032	0.0680893	0.177058
hsa-miR-186-5p	-6.70287	0.956635	0.842622	0.962874	-6.70287	1.37879	0.151131	0.301661	-6.70287	1.44671	0.0990773	0.22428
hsa-miR-186-3p	-12.357	0.912629	0.711877	0.962874	-12.357	1.38783	0.178001	0.343044	-12.357	1.3095	0.269719	0.434835
hsa-miR-187-3p	-12.6608	0.975527	0.921141	0.980995	-12.6608	1.51409	0.090394	0.210085	-12.6608	1.05697	0.824223	0.899315
hsa-miR-188-5p	-10.6931	0.802368	0.329421	0.904641	-10.6931	1.28258	0.268232	0.452754	-10.6931	1.08312	0.722652	0.845335
hsa-miR-18a-5p	-7.90946	0.759041	0.197919	0.866492	-7.90946	0.60961	0.0212715	0.0842486	-7.90946	0.719452	0.124401	0.254365
hsa-miR-18a-3p	-11.3395	0.968378	0.889015	0.965819	-11.3395	1.2084	0.409131	0.596501	-11.3395	1.37212	0.167967	0.315251
hsa-miR-18b-5p	-13.9958	0.9147	0.760068	0.962874	-13.9958	0.775248	0.389278	0.576365	-13.9958	0.494996	0.0269459	0.0922027
hsa-miR-190-5p	-10.2106	1.04132	0.858273	0.962874	-10.2106	0.737779	0.181308	0.34676	-10.2106	0.671799	0.0810681	0.192835
hsa-miR-1908-5p	-14.4485	1.42039	0.285298	0.904641	-14.4485	0.549086	0.106349	0.234621	-14.4485	0.600684	0.170133	0.316951
hsa-miR-190b	-11.8323	0.932059	0.757702	0.962874	-11.8323	0.850548	0.478302	0.657338	-11.8323	1.06658	0.776819	0.884027
hsa-miR-191-5p	-5.5323	1.17711	0.49076	0.939871	-5.5323	0.920917	0.72761	0.853118	-5.5323	1.05601	0.817768	0.897371
hsa-miR-191-3p	-10.9784	0.745728	0.187943	0.866492	-10.9784	0.854827	0.479921	0.657767	-10.9784	0.775456	0.253467	0.419405
hsa-miR-1910-5p	-12.9076	0.844393	0.507181	0.95191	-12.9076	0.720775	0.201867	0.376072	-12.9076	0.867122	0.57587	0.724156
hsa-miR-1911-5p	-11.788	1.35662	0.198326	0.866492	-11.788	1.57609	0.0542872	0.157841	-11.788	1.81873	0.0114881	0.0481541
hsa-miR-1914-3p	-13.7429	0.736606	0.302954	0.904641	-13.7429	0.700242	0.228726	0.405102	-13.7429	1.16295	0.59461	0.740318
hsa-miR-1915-3p	-14.2024	0.923901	0.80482	0.962874	-14.2024	0.977385	0.942144	0.962626	-14.2024	0.681674	0.252788	0.419405
hsa-miR-192-5p	-7.23779	1.33016	0.197472	0.866492	-7.23779	2.14352	0.000649095	0.00989379	-7.23779	2.24455	0.000304959	0.00374133
hsa-miR-193a-3p	-10.7737	1.08681	0.737648	0.962874	-10.7737	0.634977	0.0696299	0.183371	-10.7737	0.482665	0.00394977	0.0245276
hsa-miR-193a-5p	-9.17393	0.72846	0.19924	0.866492	-9.17393	0.581794	0.028848	0.101472	-9.17393	0.507825	0.0064473	0.0314853
hsa-miR-193b-3p	-7.88422	1.41326	0.179016	0.866492	-7.88422	1.00315	0.990242	0.996183	-7.88422	0.926404	0.765986	0.877656
hsa-miR-193b-5p	-9.51373	1.05935	0.797501	0.962874	-9.51373	0.834727	0.421871	0.609774	-9.51373	0.680844	0.0884335	0.203114
hsa-miR-194-5p	-8.57551	1.09019	0.725887	0.962874	-8.57551	1.95897	0.00678085	0.0426346	-8.57551	2.28064	0.000949924	0.00853235
hsa-miR-194-3p	-12.9318	0.489936	0.0124872	0.392566	-12.9318	0.894782	0.684679	0.827379	-12.9318	0.540816	0.0301401	0.0984448
hsa-miR-195-5p	-11.8843	2.13197	0.0018494	0.116281	-11.8843	1.2656	0.333949	0.524926	-11.8843	1.70318	0.028605	0.0959222
hsa-miR-195-3p	-12.9494	1.17915	0.543993	0.955522	-12.9494	2.49009	0.000454356	0.0071419	-12.9494	2.28889	0.00155791	0.0128464
hsa-miR-196a-5p	-6.52298	1.0728	0.775654	0.962874	-6.52298	1.51609	0.0925916	0.211606	-6.52298	2.30296	0.000848182	0.00796542
hsa-miR-196a-3p	-11.1208	1.09555	0.719857	0.962874	-11.1208	1.80779	0.0199548	0.079661	-11.1208	2.08171	0.00406209	0.0246172
hsa-miR-196b-5p	-10.667	1.15701	0.542921	0.955522	-10.667	1.62699	0.0425357	0.133721	-10.667	1.79942	0.0145496	0.0590197
hsa-miR-197-3p	-10.0038	1.14162	0.574724	0.960419	-10.0038	0.811548	0.377216	0.564702	-10.0038	1.27166	0.308869	0.478402
hsa-miR-1976	-14.1766	1.12528	0.72929	0.962874	-14.1766	1.67034	0.110748	0.241242	-14.1766	1.59491	0.152752	0.29152
hsa-miR-199a-3p	-13.4475	1.28179	0.378388	0.904641	-13.4475	1.61583	0.081072	0.198923	-13.4475	1.94473	0.0148387	0.0597111
hsa-miR-199b-5p	-14.2776	0.973398	0.936231	0.983455	-14.2776	0.728016	0.361707	0.551329	-14.2776	1.15118	0.670759	0.803129
hsa-miR-19a-3p	-9.00139	1.59396	0.178334	0.866492	-9.00139	0.37144	0.00489652	0.0362199	-9.00139	0.367773	0.00450374	0.0254537
hsa-miR-19b-3p	-8.38755	1.55497	0.203341	0.866492	-8.38755	0.330364	0.00177145	0.0181845	-8.38755	0.339133	0.00224836	0.0168795
hsa-miR-19b-1-5p	-13.1188	0.529658	0.0209559	0.47276	-13.1188	0.331811	0.000108388	0.00259615	-13.1188	0.309057	4.9551e-05	0.000890148
hsa-miR-200a-3p	-7.1111	1.08166	0.71945	0.962874	-7.1111	1.04665	0.834727	0.916742	-7.1111	1.05369	0.810847	0.897371
hsa-miR-200a-5p	-10.6208	1.00662	0.978123	0.990756	-10.6208	1.60461	0.0494922	0.147305	-10.6208	1.45544	0.118743	0.247833
hsa-miR-200b-3p	-6.67521	1.00557	0.980075	0.990756	-6.67521	0.875475	0.549941	0.720366	-6.67521	1.03899	0.863416	0.924039
hsa-miR-200b-5p	-9.53726	0.96654	0.875988	0.962874	-9.53726	1.01849	0.93301	0.956869	-9.53726	1.02108	0.923765	0.962016
hsa-miR-200c-3p	-3.50003	1.02484	0.911305	0.977369	-3.50003	1.04923	0.827326	0.916071	-3.50003	1.30288	0.230395	0.395525
hsa-miR-200c-5p	-10.4683	0.806957	0.321013	0.904641	-10.4683	0.883967	0.567575	0.733881	-10.4683	0.766658	0.219386	0.383163
hsa-miR-203a	-4.14258	1.21199	0.418735	0.924154	-4.14258	1.93402	0.00592821	0.0397585	-4.14258	1.92679	0.00621219	0.0306346
hsa-miR-205-5p	-8.42849	0.929618	0.7349	0.962874	-8.42849	0.914275	0.677542	0.82519	-8.42849	0.754891	0.192805	0.345128
hsa-miR-205-3p	-13.9957	0.619099	0.13207	0.820136	-13.9957	0.869329	0.644838	0.798901	-13.9957	0.730119	0.314489	0.483755
hsa-miR-20a-5p	-6.04207	1.09547	0.700486	0.962874	-6.04207	0.613503	0.0402374	0.128097	-6.04207	0.701671	0.135966	0.268738
hsa-miR-20a-3p	-12.8667	0.606798	0.0471258	0.623797	-12.8667	0.481718	0.00421276	0.0326003	-12.8667	0.587021	0.0349008	0.109719
hsa-miR-20b-5p	-11.6473	0.725228	0.158856	0.859036	-11.6473	0.753307	0.212916	0.39045	-11.6473	0.840035	0.442732	0.615178
hsa-miR-21-5p	-0.501142	1.23495	0.325877	0.904641	-0.501142	1.28722	0.239998	0.419163	-0.501142	1.4078	0.111847	0.240422
hsa-miR-21-3p	-6.87643	0.944522	0.789086	0.962874	-6.87643	1.16028	0.486133	0.662669	-6.87643	1.05844	0.790105	0.891082
hsa-miR-210-3p	-7.78788	3.2423	6.71273e-07	0.00011255	-7.78788	4.03383	5.42304e-09	5.45558e-07	-7.78788	3.95955	8.36347e-09	8.41365e-07
hsa-miR-2110	-11.0633	1.39198	0.16733	0.866492	-11.0633	0.779937	0.301306	0.49367	-11.0633	0.510599	0.00585988	0.0294752
hsa-miR-212-3p	-13.4005	1.57216	0.118879	0.801004	-13.4005	0.92346	0.790726	0.890434	-13.4005	1.4223	0.228363	0.394731
hsa-miR-215-5p	-12.1918	1.28203	0.352433	0.904641	-12.1918	2.91513	5.31025e-05	0.00166941	-12.1918	2.23422	0.0023889	0.0176708
hsa-miR-218-5p	-12.6789	1.28061	0.360047	0.904641	-12.6789	0.9977	0.993247	0.997212	-12.6789	0.746731	0.291713	0.462942
hsa-miR-219a-1-3p	-11.9633	1.02219	0.936531	0.983455	-11.9633	1.89251	0.0197042	0.0792898	-11.9633	1.56572	0.10162	0.226172
hsa-miR-219a-5p	-14.0973	0.791202	0.445475	0.924154	-14.0973	0.504398	0.0335557	0.112524	-14.0973	0.47996	0.0254929	0.0890483
hsa-miR-22-3p	-8.45912	1.39351	0.298688	0.904641	-8.45912	0.40994	0.00589622	0.0397585	-8.45912	0.401393	0.00485874	0.0268566
hsa-miR-22-5p	-12.7074	0.820116	0.459411	0.924154	-12.7074	0.569027	0.0387228	0.124061	-12.7074	0.462585	0.00551718	0.0286097
hsa-miR-221-3p	-9.72319	0.724673	0.147809	0.840957	-9.72319	0.864879	0.513115	0.686428	-9.72319	0.574957	0.0133249	0.0549378
hsa-miR-221-5p	-10.9497	0.818134	0.366373	0.904641	-10.9497	0.541154	0.00623253	0.0412495	-10.9497	0.36428	1.00002e-05	0.000264743
hsa-miR-222-3p	-9.81328	0.915653	0.713772	0.962874	-9.81328	0.584282	0.0263028	0.0958718	-9.81328	0.384089	9.58756e-05	0.00146138
hsa-miR-222-5p	-12.0446	0.405791	0.000250845	0.0294372	-12.0446	0.339472	1.40073e-05	0.000541974	-12.0446	0.299877	1.6584e-06	7.58343e-05
hsa-miR-224-5p	-13.7906	0.714983	0.25219	0.904641	-13.7906	0.844304	0.554668	0.722849	-13.7906	0.491578	0.0209601	0.0792701
hsa-miR-2276-3p	-10.4353	1.04448	0.85622	0.962874	-10.4353	1.2828	0.299584	0.492454	-10.4353	1.37157	0.188542	0.340263
hsa-miR-2277-3p	-13.6043	1.40974	0.277189	0.904641	-13.6043	1.42499	0.259972	0.44264	-13.6043	1.15744	0.649177	0.788735
hsa-miR-2277-5p	-13.0063	1.39946	0.193956	0.866492	-13.0063	1.33757	0.26048	0.44264	-13.0063	1.45658	0.145555	0.28268
hsa-miR-2278	-12.6112	0.886309	0.647977	0.962874	-12.6112	0.739726	0.256611	0.441263	-12.6112	0.849017	0.537015	0.696182
hsa-miR-2355-3p	-12.5388	1.04353	0.864526	0.962874	-12.5388	1.66585	0.0365724	0.120235	-12.5388	2.09095	0.00247806	0.0180647
hsa-miR-23a-3p	-6.9437	0.999231	0.997401	0.997401	-6.9437	0.65778	0.0772255	0.192534	-6.9437	0.863961	0.536028	0.696182
hsa-miR-23a-5p	-14.0191	0.346405	0.00402995	0.225229	-14.0191	0.304659	0.00138302	0.016836	-14.0191	0.1575	6.26874e-06	0.000197073
hsa-miR-23b-3p	-7.20858	0.777252	0.26419	0.904641	-7.20858	0.584554	0.0178894	0.0750129	-7.20858	0.793225	0.304601	0.474348
hsa-miR-23b-5p	-11.7745	0.463653	0.000726882	0.0593501	-11.7745	0.42971	0.000212155	0.00395237	-11.7745	0.426667	0.000194901	0.0026496
hsa-miR-23c	-14.2152	0.59617	0.120067	0.801004	-14.2152	0.590843	0.111767	0.242323	-14.2152	0.990813	0.976419	0.988207
hsa-miR-24-3p	-4.05627	1.22155	0.386675	0.904641	-4.05627	0.898864	0.644445	0.798901	-4.05627	1.07968	0.739997	0.857475
hsa-miR-24-1-5p	-11.3299	1.15525	0.611092	0.962874	-11.3299	0.377443	0.000846863	0.0121706	-11.3299	0.530068	0.0275838	0.0937475
hsa-miR-24-2-5p	-8.98921	0.860951	0.503859	0.95191	-8.98921	0.62601	0.0373528	0.121611	-8.98921	0.77286	0.25053	0.418974
hsa-miR-25-3p	-7.84098	1.08065	0.720508	0.962874	-7.84098	1.39862	0.122498	0.257809	-7.84098	1.40803	0.11525	0.241545
hsa-miR-25-5p	-10.8191	1.35843	0.279924	0.904641	-10.8191	0.50169	0.016285	0.0727392	-10.8191	0.246098	2.3857e-06	0.0001
hsa-miR-26a-5p	-7.00219	1.42542	0.14659	0.840957	-7.00219	0.831087	0.447794	0.631256	-7.00219	0.838962	0.471251	0.644128
hsa-miR-26a-2-3p	-13.1755	1.42141	0.205162	0.866492	-13.1755	0.93912	0.824976	0.916071	-13.1755	1.28344	0.371957	0.548664
hsa-miR-26b-5p	-7.6561	1.25253	0.336272	0.904641	-7.6561	0.783387	0.297327	0.490346	-7.6561	0.854619	0.502126	0.66641
hsa-miR-26b-3p	-11.4659	0.996683	0.98843	0.993488	-11.4659	1.50338	0.0734385	0.186563	-11.4659	1.68094	0.0227504	0.0836546
hsa-miR-27a-3p	-5.68935	1.28574	0.244869	0.904641	-5.68935	1.35971	0.155367	0.304434	-5.68935	1.37995	0.136528	0.268738
hsa-miR-27a-5p	-7.78308	1.22473	0.347114	0.904641	-7.78308	1.89783	0.00317686	0.0265365	-7.78308	2.19125	0.000321321	0.00375871
hsa-miR-27b-3p	-4.77816	1.07531	0.734623	0.962874	-4.77816	1.20382	0.386782	0.575596	-4.77816	1.30438	0.21539	0.380144
hsa-miR-27b-5p	-8.09309	0.634214	0.0423365	0.618581	-8.09309	0.682578	0.0882219	0.207363	-8.09309	0.669937	0.073832	0.180279
hsa-miR-28-3p	-8.09771	0.972322	0.909961	0.977369	-8.09771	2.15245	0.00225925	0.0214416	-8.09771	2.0395	0.00446258	0.0254537
hsa-miR-28-5p	-9.29684	1.15557	0.543624	0.955522	-9.29684	0.896726	0.647123	0.799762	-9.29684	0.874286	0.572754	0.722043
hsa-miR-296-3p	-9.64617	0.464785	0.00780441	0.298356	-9.64617	0.338241	0.000198861	0.00395237	-9.64617	0.213137	2.1569e-07	1.54989e-05
hsa-miR-296-5p	-11.2183	0.950129	0.822114	0.962874	-11.2183	0.894625	0.624635	0.777701	-11.2183	0.878262	0.56899	0.722043
hsa-miR-29a-3p	-7.71081	1.05113	0.824779	0.962874	-7.71081	0.967229	0.882381	0.943421	-7.71081	0.992028	0.97165	0.985363
hsa-miR-29a-5p	-11.4237	0.789629	0.287074	0.904641	-11.4237	0.688471	0.0933926	0.211606	-11.4237	0.733982	0.164374	0.309664
hsa-miR-29b-3p	-7.99838	0.939099	0.791976	0.962874	-7.99838	0.532162	0.00864133	0.0499608	-7.99838	0.555466	0.0142847	0.0584163
hsa-miR-29b-1-5p	-11.2612	0.413923	0.000292616	0.0294372	-11.2612	0.52957	0.00829116	0.0492371	-11.2612	0.636173	0.0590158	0.160459
hsa-miR-29b-2-5p	-11.6707	1.00831	0.97143	0.990756	-11.6707	1.34879	0.192519	0.362686	-11.6707	1.60616	0.0391601	0.120844
hsa-miR-29c-3p	-9.89867	1.37208	0.221495	0.877037	-9.89867	0.840891	0.502915	0.678796	-9.89867	0.788703	0.359318	0.534724
hsa-miR-29c-5p	-11.3295	0.993873	0.977989	0.990756	-11.3295	0.912895	0.682611	0.827379	-11.3295	1.05414	0.812772	0.897371
hsa-miR-301a-3p	-9.1327	0.653102	0.122833	0.801004	-9.1327	0.474945	0.00745653	0.0457395	-9.1327	0.583636	0.051694	0.146079
hsa-miR-301b	-11.8365	0.631225	0.0945517	0.720598	-11.8365	0.54462	0.027957	0.0991752	-11.8365	0.685728	0.169453	0.316858
hsa-miR-3064-5p	-13.0122	0.739729	0.24254	0.903685	-13.0122	0.987964	0.96161	0.979129	-13.0122	0.922843	0.751969	0.863562
hsa-miR-3065-3p	-10.9847	1.27037	0.317192	0.904641	-10.9847	2.13319	0.00159127	0.0177869	-10.9847	2.66965	4.72282e-05	0.000890148
hsa-miR-3065-5p	-11.3993	1.4271	0.115687	0.801004	-11.3993	1.19475	0.431267	0.618026	-11.3993	1.19064	0.440883	0.615178
hsa-miR-3074-3p	-13.385	0.746039	0.283602	0.904641	-13.385	0.517787	0.0192838	0.0784104	-13.385	0.61511	0.0809584	0.192835
hsa-miR-3074-5p	-14.468	1.06898	0.862551	0.962874	-14.468	2.2887	0.015267	0.0727392	-14.468	1.71407	0.132759	0.266046
hsa-miR-30a-5p	-8.12678	1.3166	0.246675	0.904641	-8.12678	2.05991	0.00255132	0.0231687	-8.12678	1.44009	0.124947	0.254446
hsa-miR-30a-3p	-10.802	1.06952	0.776668	0.962874	-10.802	1.53099	0.0722489	0.184473	-10.802	1.09608	0.698574	0.820988
hsa-miR-30b-5p	-8.76933	0.931924	0.774155	0.962874	-8.76933	0.502132	0.00551227	0.0385093	-8.76933	0.603469	0.0409444	0.125579
hsa-miR-30b-3p	-12.631	1.53123	0.0857701	0.720598	-12.631	1.88686	0.0097982	0.0541593	-12.631	1.39335	0.183188	0.333946
hsa-miR-30c-5p	-7.51372	0.627031	0.0525483	0.634757	-7.51372	0.964884	0.881428	0.943421	-7.51372	1.40348	0.158205	0.299163
hsa-miR-30c-1-3p	-13.2816	1.03121	0.907306	0.977249	-13.2816	1.29688	0.314786	0.50313	-13.2816	0.804437	0.420963	0.599071
hsa-miR-30c-2-3p	-13.3771	0.673318	0.143699	0.840474	-13.3771	0.787483	0.36822	0.5562	-13.3771	0.438439	0.00364085	0.0234951
hsa-miR-30d-5p	-4.39943	1.23848	0.368704	0.904641	-4.39943	2.38173	0.00032336	0.00545888	-4.39943	3.30813	9.88406e-07	4.97168e-05
hsa-miR-30d-3p	-11.052	1.43117	0.112448	0.801004	-11.052	2.03855	0.00164996	0.0180419	-11.052	1.80009	0.00933724	0.0411985
hsa-miR-30e-5p	-5.67551	1.18232	0.445822	0.924154	-5.67551	1.58934	0.0356316	0.117913	-5.67551	1.97022	0.00221228	0.0168795
hsa-miR-30e-3p	-8.08492	1.26416	0.3318	0.904641	-8.08492	2.00204	0.00437055	0.0333089	-8.08492	2.35342	0.000470692	0.00514691
hsa-miR-31-5p	-11.5903	1.83884	0.0542636	0.634757	-11.5903	0.576111	0.0842191	0.203664	-11.5903	0.213034	4.72897e-06	0.000158578
hsa-miR-3115	-13.6709	0.990221	0.972136	0.990756	-13.6709	0.701009	0.221493	0.397896	-13.6709	1.26898	0.387205	0.566174
hsa-miR-3127-3p	-13.3165	0.945147	0.846563	0.962874	-13.3165	1.60997	0.086543	0.206309	-13.3165	2.08555	0.00765603	0.0359905
hsa-miR-3127-5p	-11.6674	0.745854	0.315007	0.904641	-11.6674	1.02542	0.930929	0.956869	-11.6674	1.1123	0.713381	0.836435
hsa-miR-3140-3p	-13.5815	1.1346	0.686243	0.962874	-13.5815	2.17024	0.00840811	0.0492371	-13.5815	2.31476	0.00434321	0.0254537
hsa-miR-3150b-3p	-13.7493	1.32702	0.394441	0.912621	-13.7493	2.58759	0.00245471	0.0228652	-13.7493	1.5466	0.183239	0.333946
hsa-miR-3158-3p	-11.5632	2.19292	0.000825945	0.0593501	-11.5632	3.29042	4.44312e-07	3.1927e-05	-11.5632	2.64803	3.48185e-05	0.000729738
hsa-miR-3161	-13.2687	0.841536	0.520493	0.955522	-13.2687	1.10234	0.709248	0.837446	-13.2687	1.04015	0.881552	0.93475
hsa-miR-3164	-13.7664	1.3869	0.31256	0.904641	-13.7664	2.09722	0.0163557	0.0727392	-13.7664	2.7042	0.00109976	0.00970491
hsa-miR-3174	-14.1536	1.48056	0.228134	0.877037	-14.1536	0.624287	0.188282	0.356037	-14.1536	0.920466	0.809288	0.897371
hsa-miR-3175	-13.2335	0.957701	0.88392	0.962874	-13.2335	0.944551	0.846305	0.924899	-13.2335	1.5871	0.108768	0.235821
hsa-miR-3176	-10.3733	1.12259	0.63139	0.962874	-10.3733	1.71812	0.0251462	0.094392	-10.3733	1.594	0.0535594	0.150505
hsa-miR-3177-3p	-11.4986	1.12973	0.594113	0.962874	-11.4986	1.0631	0.789133	0.890434	-11.4986	1.03464	0.881926	0.93475
hsa-miR-3180	-14.4506	0.770891	0.431033	0.924154	-14.4506	0.59017	0.120515	0.255776	-14.4506	0.486877	0.0431865	0.130077
hsa-miR-3180-3p	-14.0474	0.796172	0.45256	0.924154	-14.0474	0.61876	0.121349	0.256464	-14.0474	0.497362	0.0308169	0.0993649
hsa-miR-3187-3p	-12.1909	1.03519	0.883948	0.962874	-12.1909	0.902741	0.666476	0.817652	-12.1909	0.756747	0.245404	0.414873
hsa-miR-3187-5p	-13.6817	0.769989	0.38552	0.904641	-13.6817	0.835653	0.545345	0.720323	-13.6817	0.565932	0.0673336	0.177058
hsa-miR-3188	-14.0453	1.56791	0.166542	0.866492	-14.0453	2.00093	0.0272231	0.0978088	-14.0453	1.5946	0.151155	0.290194
hsa-miR-3190-5p	-13.9119	0.939938	0.837389	0.962874	-13.9119	1.06774	0.824183	0.916071	-13.9119	1.18822	0.557945	0.714113
hsa-miR-3192-5p	-13.8385	1.11392	0.712891	0.962874	-13.8385	1.06465	0.830474	0.916071	-13.8385	1.13288	0.670436	0.803129
hsa-miR-3194-5p	-13.6672	2.05742	0.0154422	0.408812	-13.6672	1.10675	0.74256	0.866274	-13.6672	0.539508	0.0680462	0.177058
hsa-miR-3198	-14.4868	0.858294	0.697099	0.962874	-14.4868	1.11563	0.771083	0.887539	-14.4868	0.719814	0.4136	0.591025
hsa-miR-3199	-14.2034	1.09317	0.798848	0.962874	-14.2034	2.05477	0.0241696	0.0916456	-14.2034	1.80064	0.0722189	0.179236
hsa-miR-32-5p	-9.54954	1.33407	0.229942	0.877037	-9.54954	1.06592	0.790071	0.890434	-9.54954	0.844819	0.48248	0.649884
hsa-miR-32-3p	-12.5868	0.856968	0.542122	0.955522	-12.5868	0.481169	0.00500613	0.036494	-12.5868	0.330781	4.0897e-05	0.000822847
hsa-miR-3200-3p	-12.6794	0.760389	0.303164	0.904641	-12.6794	0.631072	0.0861818	0.206309	-12.6794	0.654523	0.114543	0.241545
hsa-miR-3200-5p	-14.1335	0.954458	0.884389	0.962874	-14.1335	0.410727	0.011144	0.0591033	-14.1335	0.398202	0.0099765	0.0436363
hsa-miR-320a	-7.57915	1.567	0.0790452	0.720598	-7.57915	0.978108	0.930752	0.956869	-7.57915	0.570111	0.028427	0.0959222
hsa-miR-320b	-11.0242	1.91472	0.0111165	0.372773	-11.0242	1.21974	0.435515	0.622342	-11.0242	0.803612	0.393461	0.571997
hsa-miR-320c	-11.7267	1.77441	0.0232438	0.480646	-11.7267	1.36903	0.213467	0.39045	-11.7267	0.969014	0.901498	0.946667
hsa-miR-320d	-12.2337	1.785	0.0216172	0.47276	-12.2337	1.58448	0.0679792	0.180918	-12.2337	1.23321	0.409652	0.590033
hsa-miR-324-3p	-10.518	0.930524	0.74709	0.962874	-10.518	1.09114	0.695662	0.830917	-10.518	0.887585	0.59356	0.740318
hsa-miR-324-5p	-10.5761	1.10956	0.671065	0.962874	-10.5761	0.990056	0.96744	0.981093	-10.5761	1.10963	0.670924	0.803129
hsa-miR-326	-13.5529	0.603698	0.0778236	0.720598	-13.5529	0.587365	0.0621613	0.170859	-13.5529	0.699162	0.205727	0.364369
hsa-miR-328-3p	-12.8508	1.22183	0.455886	0.924154	-12.8508	1.57276	0.0874554	0.207363	-12.8508	1.48643	0.136887	0.268738
hsa-miR-330-3p	-10.8984	1.41405	0.191463	0.866492	-10.8984	0.602934	0.058521	0.165371	-10.8984	0.628137	0.0819882	0.192835
hsa-miR-330-5p	-12.4253	1.2692	0.355098	0.904641	-12.4253	1.65311	0.0488326	0.147021	-12.4253	2.03235	0.00542014	0.0283993
hsa-miR-331-3p	-10.9635	0.878668	0.566553	0.957594	-10.9635	0.9161	0.697476	0.830917	-10.9635	0.958146	0.849603	0.915097
hsa-miR-331-5p	-11.1607	0.915314	0.690374	0.962874	-11.1607	1.15855	0.506034	0.678796	-11.1607	1.04452	0.844252	0.911415
hsa-miR-335-5p	-9.45177	0.871008	0.561308	0.957078	-9.45177	0.554062	0.0137033	0.0682451	-9.45177	0.635507	0.0576675	0.157645
hsa-miR-335-3p	-9.15167	0.776764	0.25817	0.904641	-9.15167	0.619523	0.0327442	0.110539	-9.15167	0.781049	0.26867	0.434835
hsa-miR-338-3p	-12.2072	1.17068	0.54799	0.955522	-12.2072	0.867904	0.591819	0.755636	-12.2072	1.25206	0.39126	0.570446
hsa-miR-338-5p	-12.2509	1.14701	0.572921	0.960419	-12.2509	2.1129	0.00170617	0.0181845	-12.2509	2.71773	2.80514e-05	0.000671897
hsa-miR-339-3p	-7.16596	1.04986	0.823902	0.962874	-7.16596	1.56238	0.0420925	0.133161	-7.16596	1.48239	0.0726922	0.179236
hsa-miR-339-5p	-9.78416	1.20117	0.471324	0.926078	-9.78416	0.644556	0.0858045	0.206309	-9.78416	0.602283	0.0477312	0.137982
hsa-miR-33a-5p	-9.86051	1.27508	0.331089	0.904641	-9.86051	1.04916	0.84767	0.924899	-9.86051	0.65466	0.091712	0.209687
hsa-miR-33a-3p	-15.0967	0.443318	0.0428179	0.618581	-15.0967	0.223634	0.000872539	0.0121913	-15.0967	0.173639	0.000286041	0.00359973
hsa-miR-33b-5p	-9.63195	1.26638	0.317585	0.904641	-9.63195	2.8651	1.21402e-05	0.000508877	-9.63195	1.9666	0.00446452	0.0254537
hsa-miR-33b-3p	-12.7025	0.944282	0.813993	0.962874	-12.7025	0.620384	0.0554973	0.160432	-12.7025	1.14696	0.570494	0.722043
hsa-miR-340-5p	-8.86488	1.45531	0.142043	0.840474	-8.86488	0.658463	0.102536	0.228211	-8.86488	0.656901	0.100647	0.225002
hsa-miR-340-3p	-10.7412	1.25179	0.336133	0.904641	-10.7412	0.838404	0.451525	0.634406	-10.7412	1.17158	0.497715	0.664606
hsa-miR-342-3p	-6.64797	0.958812	0.871491	0.962874	-6.64797	1.0873	0.747554	0.868406	-6.64797	1.5111	0.113571	0.241545
hsa-miR-342-5p	-8.20157	0.844592	0.474894	0.926177	-8.20157	0.980641	0.934041	0.956869	-8.20157	0.969947	0.897219	0.945882
hsa-miR-345-5p	-8.36881	1.27672	0.34474	0.904641	-8.36881	0.841436	0.50412	0.678796	-8.36881	0.627361	0.0724062	0.179236
hsa-miR-34a-5p	-9.28482	1.12071	0.623766	0.962874	-9.28482	0.939101	0.786828	0.890434	-9.28482	1.02997	0.89887	0.945882
hsa-miR-34c-5p	-11.6985	1.24729	0.333772	0.904641	-11.6985	1.12422	0.608563	0.765268	-11.6985	0.961003	0.862596	0.924039
hsa-miR-203b-3p	-11.0184	1.1824	0.548282	0.955522	-11.0184	2.10795	0.00781958	0.0473885	-11.0184	2.2607	0.00369009	0.0234951
hsa-miR-3605-5p	-13.5773	0.942299	0.834458	0.962874	-13.5773	0.794313	0.423283	0.610061	-13.5773	1.06531	0.822361	0.899234
hsa-miR-3613-3p	-14.6012	0.522361	0.0612474	0.674291	-14.6012	0.408606	0.0124295	0.0637961	-14.6012	0.243941	0.000383713	0.00428906
hsa-miR-3613-5p	-9.29846	0.878933	0.615611	0.962874	-9.29846	0.355467	8.28072e-05	0.002314	-9.29846	0.375506	0.000187707	0.00262268
hsa-miR-361-3p	-10.7079	1.137	0.609718	0.962874	-10.7079	1.81696	0.0178957	0.0750129	-10.7079	1.84789	0.0149731	0.0597736
hsa-miR-3614-5p	-12.9426	1.50533	0.126331	0.804362	-12.9426	2.43702	0.000706592	0.0104534	-12.9426	0.55641	0.0429912	0.130077
hsa-miR-3615	-11.5933	1.24261	0.359332	0.904641	-11.5933	2.06069	0.00222889	0.0214416	-11.5933	1.59741	0.0476498	0.137982
hsa-miR-361-5p	-8.54071	0.888012	0.594809	0.962874	-8.54071	0.783249	0.274422	0.460114	-8.54071	0.926364	0.731904	0.850226
hsa-miR-3619-3p	-13.1117	1.30087	0.419881	0.924154	-13.1117	3.11084	0.000260608	0.00468164	-13.1117	4.15132	4.55818e-06	0.000158578
hsa-miR-362-3p	-14.5679	0.830704	0.599678	0.962874	-14.5679	0.61181	0.181135	0.34676	-14.5679	0.65789	0.254628	0.419405
hsa-miR-362-5p	-11.7078	0.951137	0.838415	0.962874	-11.7078	0.624635	0.0579425	0.165371	-11.7078	0.470228	0.00273915	0.019065
hsa-miR-363-3p	-11.7508	1.21401	0.401691	0.914256	-11.7508	0.931098	0.758425	0.874972	-11.7508	0.830478	0.426069	0.603698
hsa-miR-365a-3p	-10.0631	1.00207	0.994082	0.996062	-10.0631	0.570131	0.045352	0.139885	-10.0631	0.870441	0.618634	0.758044
hsa-miR-365a-5p	-10.6199	0.581765	0.0325966	0.565383	-10.6199	0.625112	0.0631574	0.17172	-10.6199	0.513806	0.00886757	0.0403618
hsa-miR-3653	-13.7324	0.905234	0.736768	0.962874	-13.7324	1.37502	0.258367	0.442036	-13.7324	1.23233	0.466579	0.641227
hsa-miR-3660	-14.0213	1.29063	0.423086	0.924154	-14.0213	1.47653	0.211217	0.39045	-14.0213	1.20134	0.568916	0.722043
hsa-miR-3662	-12.4833	1.01553	0.95507	0.988478	-12.4833	0.599885	0.0664722	0.178199	-12.4833	0.516045	0.0189249	0.0721154
hsa-miR-3663-3p	-14.0772	1.66989	0.160535	0.859036	-14.0772	3.66675	0.000105143	0.00259615	-14.0772	2.23184	0.0230007	0.083836
hsa-miR-3664-3p	-13.8518	1.05391	0.867774	0.962874	-13.8518	0.924985	0.806023	0.902961	-13.8518	0.821921	0.54542	0.701652
hsa-miR-3677-3p	-12.9652	1.76763	0.0447051	0.618581	-12.9652	2.94386	9.84307e-05	0.00259615	-12.9652	2.73054	0.000314751	0.00375871
hsa-miR-3679-5p	-12.6894	0.927716	0.773365	0.962874	-12.6894	1.25783	0.369814	0.556936	-12.6894	1.49712	0.113811	0.241545
hsa-miR-3691-5p	-13.0699	1.01779	0.951142	0.988478	-13.0699	1.65628	0.068879	0.182348	-13.0699	2.51259	0.000794152	0.00768189
hsa-miR-374a-5p	-9.82921	0.866404	0.529838	0.955522	-9.82921	0.717499	0.146764	0.295289	-9.82921	0.856747	0.498249	0.664606
hsa-miR-374a-3p	-7.42425	1.30346	0.368949	0.904641	-7.42425	2.04575	0.0161684	0.0727392	-7.42425	1.96394	0.0231783	0.0838754
hsa-miR-374b-5p	-8.518	0.861889	0.517265	0.955522	-8.518	0.598822	0.0262476	0.0958718	-8.518	0.805203	0.345468	0.520271
hsa-miR-374b-3p	-11.6716	1.29704	0.291457	0.904641	-11.6716	1.19889	0.461909	0.643372	-11.6716	1.38536	0.186021	0.337793
hsa-miR-375	-6.36023	0.865169	0.500327	0.949676	-6.36023	1.38228	0.13258	0.273099	-6.36023	1.49625	0.0615033	0.164554
hsa-miR-378a-3p	-6.44816	1.21753	0.421863	0.924154	-6.44816	1.95604	0.00662373	0.0424803	-6.44816	1.61717	0.0507178	0.14413
hsa-miR-378a-5p	-12.8791	0.950441	0.851783	0.962874	-12.8791	1.15393	0.593736	0.755636	-12.8791	0.910207	0.73017	0.850175
hsa-miR-378c	-10.2771	1.01872	0.938573	0.983546	-10.2771	2.11179	0.00203839	0.0201041	-10.2771	1.88217	0.00890688	0.0403618
hsa-miR-378d	-12.9391	1.04401	0.875985	0.962874	-12.9391	2.38616	0.000962728	0.0130879	-12.9391	2.08342	0.00568318	0.0290156
hsa-miR-378i	-12.1014	1.37813	0.220921	0.877037	-12.1014	2.62643	0.000204206	0.00395237	-12.1014	2.68537	0.000149336	0.00214617
hsa-miR-379-5p	-13.5455	0.867941	0.627875	0.962874	-13.5455	1.85998	0.0228407	0.088376	-13.5455	0.935381	0.818016	0.897371
hsa-miR-3911	-12.7058	0.693651	0.193598	0.866492	-12.7058	0.940596	0.824313	0.916071	-12.7058	1.11311	0.697008	0.820988
hsa-miR-3912-3p	-12.3663	1.1724	0.528218	0.955522	-12.3663	0.916246	0.730376	0.85437	-12.3663	0.97299	0.91414	0.955951
hsa-miR-3913-5p	-12.1787	1.06218	0.803518	0.962874	-12.1787	1.91457	0.00637842	0.0416668	-12.1787	2.26325	0.000613061	0.0063435
hsa-miR-3928-3p	-11.1484	1.21799	0.46893	0.924987	-11.1484	2.28163	0.00257942	0.0231687	-11.1484	2.11842	0.00604281	0.0300944
hsa-miR-3929	-14.0995	1.21796	0.532227	0.955522	-14.0995	0.842206	0.600416	0.760094	-14.0995	1.19726	0.570448	0.722043
hsa-miR-3934-5p	-11.1703	1.20564	0.448567	0.924154	-11.1703	1.89959	0.0093642	0.0532579	-11.1703	2.09805	0.00275247	0.019065
hsa-miR-3942-5p	-13.8682	1.82616	0.07504	0.720598	-13.8682	2.27044	0.0130072	0.0654261	-13.8682	2.51652	0.00507211	0.027433
hsa-miR-3944-3p	-13.5635	1.23213	0.46047	0.924154	-13.5635	1.48527	0.152447	0.303087	-13.5635	1.4119	0.217564	0.382639
hsa-miR-421	-10.8572	1.18847	0.46667	0.924154	-10.8572	0.786119	0.312204	0.502684	-10.8572	0.98368	0.944765	0.973804
hsa-miR-422a	-14.3824	0.901203	0.777607	0.962874	-14.3824	2.09136	0.0227928	0.088376	-14.3824	1.2831	0.475173	0.646162
hsa-miR-423-3p	-7.21983	0.934421	0.756723	0.962874	-7.21983	0.799803	0.308063	0.499857	-7.21983	0.926212	0.726282	0.84761
hsa-miR-423-5p	-6.78914	1.3748	0.171005	0.866492	-6.78914	0.84564	0.470209	0.649767	-6.78914	0.56767	0.0153527	0.0608063
hsa-miR-424-5p	-8.55627	1.6572	0.0826296	0.720598	-8.55627	0.62116	0.101796	0.227811	-8.55627	0.429596	0.00405142	0.0246172
hsa-miR-424-3p	-10.9186	0.63864	0.0893261	0.720598	-10.9186	0.314182	1.93496e-05	0.000695205	-10.9186	0.231694	1.15138e-07	9.65239e-06
hsa-miR-425-5p	-6.63066	1.13839	0.555656	0.955522	-6.63066	0.956231	0.838711	0.91911	-6.63066	1.29409	0.241616	0.410584
hsa-miR-425-3p	-9.59902	1.08259	0.719307	0.962874	-9.59902	1.66071	0.0220815	0.0867733	-9.59902	1.68764	0.0182553	0.0700946
hsa-miR-429	-7.37992	1.22932	0.380665	0.904641	-7.37992	0.781658	0.2958	0.489433	-7.37992	0.867271	0.545254	0.701652
hsa-miR-4435	-14.0551	2.03896	0.0389607	0.618581	-14.0551	1.89597	0.0638702	0.172724	-14.0551	3.65995	6.76246e-05	0.00109726
hsa-miR-4446-3p	-9.89734	1.06444	0.77202	0.962874	-9.89734	0.979658	0.92404	0.956869	-9.89734	1.10371	0.647113	0.78813
hsa-miR-4466	-13.4758	0.531128	0.0269834	0.502691	-13.4758	0.127682	7.35069e-10	1.23247e-07	-13.4758	0.19358	2.74268e-07	1.72446e-05
hsa-miR-448	-13.3568	1.01071	0.967443	0.990756	-13.3568	0.635558	0.0930173	0.211606	-13.3568	0.553829	0.0323179	0.102885
hsa-miR-4485	-14.0435	1.27982	0.43219	0.924154	-14.0435	1.00094	0.997677	0.997677	-14.0435	1.9189	0.0303724	0.0985635
hsa-miR-4498	-13.8213	0.949041	0.864409	0.962874	-13.8213	1.30955	0.358832	0.551329	-13.8213	1.13496	0.673725	0.803129
hsa-miR-4504	-13.742	2.1381	0.0169267	0.425708	-13.742	2.96752	0.000409013	0.00663657	-13.742	2.55373	0.00276688	0.019065
hsa-miR-450a-5p	-10.4358	1.1169	0.659176	0.962874	-10.4358	0.90012	0.674873	0.82519	-10.4358	0.675483	0.119682	0.24822
hsa-miR-450b-5p	-8.79552	1.11864	0.62081	0.962874	-8.79552	1.32355	0.216603	0.392766	-8.79552	1.30554	0.239885	0.409024
hsa-miR-4510	-11.6102	1.07876	0.756732	0.962874	-11.6102	1.16442	0.533146	0.711333	-11.6102	1.18765	0.481757	0.649884
hsa-miR-4517	-11.7195	1.34041	0.230157	0.877037	-11.7195	0.789278	0.336528	0.527332	-11.7195	0.743008	0.229334	0.395051
hsa-miR-452-5p	-13.5815	1.19506	0.530434	0.955522	-13.5815	1.12259	0.683945	0.827379	-13.5815	1.22037	0.483214	0.649884
hsa-miR-4521	-13.1645	0.164412	4.55362e-10	2.29047e-07	-13.1645	0.0948195	1.93963e-14	9.75634e-12	-13.1645	0.0937285	2.95178e-14	7.42372e-12
hsa-miR-4525	-13.9576	1.68404	0.0891803	0.720598	-13.9576	0.828909	0.56602	0.733784	-13.9576	0.720685	0.329153	0.502677
hsa-miR-4526	-14.0418	0.853361	0.619894	0.962874	-14.0418	0.567177	0.088723	0.207571	-14.0418	0.803985	0.499445	0.664606
hsa-miR-454-3p	-9.26339	0.714481	0.18928	0.866492	-9.26339	0.496369	0.00667185	0.0424803	-9.26339	0.625989	0.0680649	0.177058
hsa-miR-454-5p	-10.6942	0.815637	0.382152	0.904641	-10.6942	0.804702	0.351332	0.543753	-10.6942	1.24063	0.353675	0.527889
hsa-miR-455-3p	-12.5821	1.29044	0.302994	0.904641	-12.5821	0.464291	0.00315326	0.0265365	-12.5821	0.449175	0.00224306	0.0168795
hsa-miR-455-5p	-12.1358	1.07593	0.755363	0.962874	-12.1358	1.27174	0.303323	0.494268	-12.1358	0.887498	0.614146	0.756334
hsa-miR-4638-3p	-13.1614	0.956083	0.873049	0.962874	-13.1614	1.37684	0.24095	0.41937	-13.1614	1.68245	0.0551712	0.152847
hsa-miR-4640-5p	-13.0335	0.953203	0.86682	0.962874	-13.0335	1.31667	0.326426	0.514709	-13.0335	0.835565	0.533315	0.694968
hsa-miR-4648	-14.0508	0.729691	0.34058	0.904641	-14.0508	1.20315	0.549036	0.720366	-14.0508	0.983627	0.958695	0.98155
hsa-miR-4652-5p	-13.8287	1.33904	0.320734	0.904641	-13.8287	1.11847	0.706974	0.836725	-13.8287	1.54277	0.135485	0.268738
hsa-miR-4654	-12.1729	0.948196	0.843459	0.962874	-12.1729	1.59958	0.0773199	0.192534	-12.1729	1.52877	0.111258	0.240184
hsa-miR-4660	-14.2504	0.750958	0.443324	0.924154	-14.2504	1.99855	0.0319486	0.110069	-14.2504	1.87486	0.0553044	0.152847
hsa-miR-4662a-5p	-13.6886	0.825229	0.55269	0.955522	-13.6886	0.95925	0.895948	0.948762	-13.6886	1.05451	0.86712	0.924128
hsa-miR-4664-3p	-14.4029	0.944084	0.873892	0.962874	-14.4029	1.34165	0.390737	0.576365	-14.4029	0.991754	0.981675	0.988485
hsa-miR-4668-5p	-14.3107	0.714066	0.315599	0.904641	-14.3107	0.460409	0.0279978	0.0991752	-14.3107	0.805877	0.514962	0.677144
hsa-miR-4669	-13.6168	0.714104	0.262874	0.904641	-13.6168	1.3201	0.323194	0.511215	-13.6168	1.22552	0.475308	0.646162
hsa-miR-4677-3p	-12.9412	1.04448	0.876597	0.962874	-12.9412	1.50596	0.135389	0.276833	-12.9412	1.72512	0.0463531	0.137151
hsa-miR-4707-5p	-12.3436	0.516743	0.0180908	0.433317	-12.3436	0.677128	0.156274	0.304674	-12.3436	0.452582	0.0048526	0.0268566
hsa-miR-4714-3p	-13.9193	1.20189	0.557447	0.955522	-13.9193	2.0266	0.0164856	0.0727392	-13.9193	1.3761	0.30144	0.472351
hsa-miR-4725-3p	-14.4565	1.05228	0.876944	0.962874	-14.4565	0.539457	0.0836977	0.203381	-14.4565	0.396963	0.0155441	0.0610834
hsa-miR-4742-3p	-12.6762	1.55228	0.131101	0.820136	-12.6762	1.55851	0.126678	0.264394	-12.6762	2.12378	0.0093047	0.0411985
hsa-miR-4745-5p	-12.3983	0.739473	0.291073	0.904641	-12.3983	0.914581	0.752384	0.872003	-12.3983	0.717733	0.246614	0.414873
hsa-miR-4746-5p	-11.9931	1.368	0.19721	0.866492	-11.9931	2.12762	0.00176012	0.0181845	-11.9931	2.17034	0.00135092	0.0115172
hsa-miR-4760-5p	-10.8652	1.81528	0.00792182	0.298356	-10.8652	2.0373	0.00154833	0.0177003	-10.8652	1.79705	0.00904462	0.04062
hsa-miR-4778-5p	-13.9161	1.24752	0.464626	0.924154	-13.9161	1.2845	0.402647	0.588754	-13.9161	1.32242	0.353222	0.527889
hsa-miR-4784	-14.306	1.53583	0.253172	0.904641	-14.306	2.68187	0.00449213	0.0337245	-14.306	2.27318	0.0213891	0.0802888
hsa-miR-4791	-13.7259	1.468	0.191098	0.866492	-13.7259	1.77983	0.0445426	0.139161	-13.7259	1.39604	0.259283	0.424819
hsa-miR-4798-5p	-14.0127	1.28644	0.460172	0.924154	-14.0127	2.27821	0.00958823	0.0535876	-14.0127	2.05111	0.0263622	0.0910385
hsa-miR-4802-3p	-12.3103	1.11545	0.646102	0.962874	-12.3103	1.03023	0.900495	0.949579	-12.3103	1.21028	0.421613	0.599071
hsa-miR-4804-5p	-13.913	0.874218	0.655737	0.962874	-13.913	0.806156	0.474888	0.654435	-13.913	0.682378	0.218956	0.383163
hsa-miR-483-5p	-13.344	0.971285	0.913261	0.977384	-13.344	0.974395	0.92229	0.956869	-13.344	0.754795	0.304162	0.474348
hsa-miR-484	-10.1972	1.13771	0.577044	0.961103	-10.1972	1.03451	0.883402	0.943421	-10.1972	0.990794	0.968126	0.984987
hsa-miR-486-5p	-12.9418	1.10645	0.729776	0.962874	-12.9418	2.0412	0.0121243	0.0628714	-12.9418	1.90593	0.024001	0.0857833
hsa-miR-489-3p	-9.52438	1.42892	0.115156	0.801004	-9.52438	1.04987	0.8296	0.916071	-9.52438	1.11622	0.626887	0.76535
hsa-miR-491-5p	-13.5567	1.41315	0.20844	0.866492	-13.5567	1.00398	0.98876	0.996183	-13.5567	1.38598	0.236636	0.404857
hsa-miR-494-3p	-14.2379	1.18659	0.567322	0.957594	-14.2379	0.484489	0.0295042	0.10306	-14.2379	0.174463	1.54403e-05	0.000388323
hsa-miR-497-5p	-12.0358	1.27606	0.370547	0.904641	-12.0358	0.925996	0.77871	0.890434	-12.0358	1.1298	0.654742	0.791672
hsa-miR-499-5p	-13.6385	1.11819	0.715051	0.962874	-13.6385	0.895826	0.722767	0.85141	-13.6385	0.714331	0.291636	0.462942
hsa-miR-500a-5p	-11.8196	0.846452	0.463199	0.924154	-11.8196	0.964077	0.871396	0.941995	-11.8196	1.16483	0.498617	0.664606
hsa-miR-500a-3p	-10.5234	0.821635	0.367596	0.904641	-10.5234	0.969529	0.886862	0.945109	-10.5234	0.933229	0.750928	0.863562
hsa-miR-500b-5p	-11.8244	0.847023	0.465212	0.924154	-11.8244	0.963269	0.868539	0.941995	-11.8244	1.16138	0.507221	0.6714
hsa-miR-501-3p	-10.9169	0.762373	0.222483	0.877037	-10.9169	0.874629	0.545613	0.720323	-10.9169	0.954828	0.834739	0.906855
hsa-miR-501-5p	-11.3821	0.814634	0.36362	0.904641	-11.3821	0.880137	0.570472	0.733881	-11.3821	0.91356	0.688069	0.814349
hsa-miR-502-3p	-11.6601	0.721126	0.152701	0.847433	-11.6601	0.976849	0.917568	0.956869	-11.6601	1.02049	0.928635	0.963457
hsa-miR-502-5p	-13.5314	1.07395	0.793354	0.962874	-13.5314	0.694538	0.19706	0.368481	-13.5314	1.06916	0.806451	0.897371
hsa-miR-503-5p	-9.23769	1.49208	0.0872843	0.720598	-9.23769	0.990319	0.966754	0.981093	-9.23769	0.464104	0.00117885	0.0102235
hsa-miR-505-3p	-10.7516	0.934956	0.756132	0.962874	-10.7516	0.720771	0.132034	0.273099	-10.7516	0.712869	0.119915	0.24822
hsa-miR-505-5p	-12.6969	0.727	0.189099	0.866492	-12.6969	0.357247	5.20348e-05	0.00166941	-12.6969	0.353324	4.85786e-05	0.000890148
hsa-miR-512-3p	-13.0128	1.95305	0.0141385	0.408812	-13.0128	1.34541	0.282928	0.471234	-13.0128	1.59875	0.0883846	0.203114
hsa-miR-516a-5p	-11.6765	1.21175	0.417825	0.924154	-11.6765	1.64929	0.0341672	0.113815	-11.6765	1.50296	0.0850568	0.198072
hsa-miR-516b-5p	-13.4812	1.00366	0.989537	0.993488	-13.4812	1.00428	0.987678	0.996183	-13.4812	1.61488	0.0737251	0.180279
hsa-miR-518b	-13.7913	1.89698	0.045502	0.618581	-13.7913	1.35185	0.358495	0.551329	-13.7913	1.88381	0.0484204	0.138383
hsa-miR-519a-3p	-12.7908	1.14331	0.599454	0.962874	-12.7908	0.503392	0.0101053	0.0552498	-12.7908	0.652116	0.104043	0.229534
hsa-miR-519a-5p	-11.5135	1.00374	0.986724	0.993488	-11.5135	0.914073	0.689166	0.827379	-11.5135	1.1929	0.430911	0.607526
hsa-miR-522-3p	-11.7016	1.03015	0.903504	0.975242	-11.7016	0.63938	0.0712102	0.184473	-11.7016	0.789952	0.33896	0.512394
hsa-miR-532-3p	-12.5567	0.839432	0.479851	0.927542	-12.5567	0.665505	0.103743	0.22988	-12.5567	0.805448	0.383941	0.563038
hsa-miR-532-5p	-9.18634	0.95027	0.843576	0.962874	-9.18634	1.77787	0.026862	0.0972057	-9.18634	1.78836	0.0253724	0.0890483
hsa-miR-542-3p	-8.13079	1.14249	0.532573	0.955522	-8.13079	1.40268	0.113545	0.24512	-8.13079	1.06282	0.77526	0.884027
hsa-miR-542-5p	-10.3786	1.02228	0.919757	0.980995	-10.3786	1.00342	0.987534	0.996183	-10.3786	0.843012	0.435778	0.612281
hsa-miR-545-3p	-13.7806	0.92653	0.792104	0.962874	-13.7806	0.719876	0.26586	0.45026	-13.7806	0.772678	0.383678	0.563038
hsa-miR-545-5p	-13.261	1.0551	0.842185	0.962874	-13.261	0.611489	0.0792307	0.19632	-13.261	0.838996	0.522189	0.682237
hsa-miR-548a-3p	-14.1459	1.12333	0.749594	0.962874	-14.1459	2.54955	0.00416809	0.0326003	-14.1459	2.32749	0.0109368	0.0466203
hsa-miR-548d-3p	-14.2648	0.773687	0.438714	0.924154	-14.2648	0.633482	0.176388	0.341242	-14.2648	0.872513	0.676992	0.803129
hsa-miR-548e-3p	-12.3755	1.4706	0.148798	0.840957	-12.3755	0.720007	0.227625	0.404577	-12.3755	0.647635	0.113429	0.241545
hsa-miR-548f-3p	-14.0472	0.937929	0.843617	0.962874	-14.0472	1.15368	0.64965	0.800917	-14.0472	1.4318	0.246373	0.414873
hsa-miR-548h-5p	-13.9527	1.24145	0.506766	0.95191	-13.9527	1.45865	0.236102	0.413795	-13.9527	1.6164	0.13034	0.262244
hsa-miR-548j-5p	-12.5161	1.11043	0.667132	0.962874	-12.5161	1.16237	0.534718	0.711543	-12.5161	1.29097	0.291755	0.462942
hsa-miR-548k	-12.7033	1.30052	0.292437	0.904641	-12.7033	0.646755	0.0906332	0.210085	-12.7033	0.649945	0.0958214	0.218091
hsa-miR-548l	-14.0629	1.04719	0.881679	0.962874	-14.0629	0.804744	0.494914	0.672816	-14.0629	1.17254	0.603557	0.745919
hsa-miR-548o-3p	-13.4564	1.20047	0.52654	0.955522	-13.4564	1.49292	0.155223	0.304434	-13.4564	1.57939	0.105867	0.231525
hsa-miR-550a-5p	-12.7018	1.194	0.512376	0.955522	-12.7018	0.866897	0.601426	0.760094	-12.7018	0.845595	0.541854	0.700649
hsa-miR-550a-3p	-13.2682	1.13994	0.633889	0.962874	-13.2682	1.17431	0.55668	0.72354	-13.2682	1.65716	0.0603475	0.162635
hsa-miR-556-3p	-14.1435	0.663931	0.214548	0.877037	-14.1435	0.758596	0.391983	0.576514	-14.1435	0.747022	0.371099	0.548664
hsa-miR-556-5p	-11.8383	0.947256	0.81249	0.962874	-11.8383	1.02659	0.90821	0.95571	-11.8383	1.06952	0.767957	0.877915
hsa-miR-573	-13.1001	0.664056	0.102976	0.773088	-13.1001	0.181646	1.49848e-09	1.88433e-07	-13.1001	0.08567	8.53142e-15	4.2913e-12
hsa-miR-574-3p	-12.2862	1.43595	0.207951	0.866492	-12.2862	0.555632	0.0463069	0.140983	-12.2862	0.638118	0.125926	0.255407
hsa-miR-576-3p	-13.3028	1.34353	0.281464	0.904641	-13.3028	1.90035	0.0158492	0.0727392	-13.3028	1.79523	0.029382	0.0972312
hsa-miR-576-5p	-12.7791	1.23739	0.434235	0.924154	-12.7791	1.15058	0.606998	0.765213	-12.7791	1.47292	0.153004	0.29152
hsa-miR-577	-11.8198	0.923713	0.762023	0.962874	-11.8198	1.38499	0.209683	0.389191	-11.8198	2.15413	0.00318569	0.0213654
hsa-miR-580-3p	-13.3954	0.928541	0.790151	0.962874	-13.3954	1.21982	0.461991	0.643372	-13.3954	1.55346	0.0994324	0.22428
hsa-miR-582-3p	-13.2824	1.07969	0.795528	0.962874	-13.2824	1.06688	0.826303	0.916071	-13.2824	1.38064	0.26903	0.434835
hsa-miR-582-5p	-14.1126	1.14525	0.673025	0.962874	-14.1126	0.424548	0.0168285	0.0729721	-14.1126	0.54348	0.0816591	0.192835
hsa-miR-584-5p	-11.4726	1.08945	0.726976	0.962874	-11.4726	1.44719	0.13074	0.271744	-11.4726	1.46163	0.121117	0.248661
hsa-miR-589-5p	-9.58367	1.01442	0.953967	0.988478	-9.58367	1.5984	0.0593875	0.165955	-9.58367	1.75411	0.0241506	0.0857833
hsa-miR-589-3p	-11.6633	0.902295	0.66911	0.962874	-11.6633	0.485176	0.00321814	0.0265365	-11.6633	0.541209	0.0120979	0.0502913
hsa-miR-590-3p	-10.4346	1.0909	0.742969	0.962874	-10.4346	0.546656	0.0242323	0.0916456	-10.4346	0.618296	0.0719881	0.179236
hsa-miR-590-5p	-10.9124	0.916434	0.699315	0.962874	-10.9124	0.668009	0.0758169	0.191638	-10.9124	0.794218	0.309107	0.478402
hsa-miR-598-3p	-9.40694	1.23282	0.331034	0.904641	-9.40694	1.4752	0.0714346	0.184473	-9.40694	1.38054	0.134624	0.268714
hsa-miR-615-3p	-11.0882	0.810644	0.342898	0.904641	-11.0882	0.845244	0.446692	0.631256	-11.0882	0.867063	0.518787	0.679557
hsa-miR-615-5p	-13.2875	0.734187	0.270747	0.904641	-13.2875	1.38469	0.21895	0.394738	-13.2875	1.35823	0.250718	0.418974
hsa-miR-624-5p	-13.4117	1.01915	0.945837	0.985002	-13.4117	0.963419	0.893702	0.94838	-13.4117	1.2996	0.339219	0.512394
hsa-miR-625-3p	-11.8569	1.10361	0.691103	0.962874	-11.8569	1.07248	0.777815	0.890434	-11.8569	1.35307	0.221886	0.384858
hsa-miR-627-5p	-10.427	1.44414	0.153313	0.847433	-10.427	2.71863	0.000124937	0.00285651	-10.427	2.29088	0.00139816	0.0117213
hsa-miR-628-3p	-11.6512	1.07311	0.767582	0.962874	-11.6512	0.68467	0.116295	0.249984	-11.6512	0.730978	0.193492	0.34513
hsa-miR-628-5p	-10.4286	0.930394	0.750726	0.962874	-10.4286	0.649632	0.0589509	0.165655	-10.4286	0.989252	0.962036	0.98155
hsa-miR-629-5p	-9.01979	0.898261	0.654761	0.962874	-9.01979	1.55486	0.0666033	0.178199	-9.01979	1.53417	0.0752584	0.182657
hsa-miR-629-3p	-13.8507	0.767989	0.374345	0.904641	-13.8507	0.690075	0.214506	0.390929	-13.8507	0.995617	0.987885	0.988485
hsa-miR-636	-14.1367	0.661488	0.207788	0.866492	-14.1367	0.873406	0.666127	0.817652	-14.1367	0.835195	0.572044	0.722043
hsa-miR-643	-13.865	0.975917	0.933655	0.983455	-13.865	1.08319	0.780931	0.890434	-13.865	0.934603	0.818715	0.897371
hsa-miR-651-5p	-12.5814	1.35899	0.201186	0.866492	-12.5814	1.09792	0.698763	0.830917	-12.5814	0.872746	0.578788	0.726011
hsa-miR-652-3p	-8.12524	1.05061	0.824349	0.962874	-8.12524	1.22302	0.365712	0.554696	-8.12524	1.25322	0.310637	0.479296
hsa-miR-653-5p	-9.68146	0.935257	0.773631	0.962874	-9.68146	0.964503	0.876541	0.942094	-9.68146	0.954698	0.842082	0.911415
hsa-miR-660-5p	-11.294	0.915228	0.698829	0.962874	-11.294	0.761547	0.235574	0.413795	-11.294	0.657096	0.0690174	0.177058
hsa-miR-664a-3p	-14.3675	1.29469	0.476898	0.926177	-14.3675	1.20076	0.616483	0.769456	-14.3675	0.724661	0.411209	0.590033
hsa-miR-664a-5p	-12.2694	1.22777	0.389256	0.906462	-12.2694	1.23386	0.376974	0.564702	-12.2694	1.20131	0.442257	0.615178
hsa-miR-671-3p	-11.6433	0.822992	0.423223	0.924154	-11.6433	1.15302	0.554711	0.722849	-11.6433	1.63096	0.0423126	0.128989
hsa-miR-671-5p	-7.78168	1.09241	0.699856	0.962874	-7.78168	0.858547	0.50606	0.678796	-7.78168	0.633456	0.0473969	0.137982
hsa-miR-675-5p	-13.5404	0.90358	0.728043	0.962874	-13.5404	0.487795	0.0188196	0.0782333	-13.5404	0.476479	0.0165994	0.0642269
hsa-miR-675-3p	-11.1235	1.25323	0.317986	0.904641	-11.1235	0.998758	0.995617	0.9976	-11.1235	1.26388	0.300296	0.472028
hsa-miR-676-3p	-14.0063	1.07988	0.812404	0.962874	-14.0063	1.61484	0.118037	0.251578	-14.0063	1.56489	0.148786	0.287844
hsa-miR-7-5p	-7.34224	1.80622	0.030251	0.543437	-7.34224	0.596015	0.0575277	0.165351	-7.34224	0.468701	0.00571083	0.0290156
hsa-miR-708-5p	-10.0067	1.34391	0.181548	0.866492	-10.0067	1.11711	0.616342	0.769456	-10.0067	1.31097	0.22098	0.384613
hsa-miR-708-3p	-12.054	1.05317	0.824347	0.962874	-12.054	1.57444	0.0491044	0.147021	-12.054	1.61454	0.038185	0.119299
hsa-miR-7-1-3p	-13.0704	1.16544	0.582365	0.962874	-13.0704	0.441618	0.00574703	0.0395994	-13.0704	0.604697	0.0824292	0.192846
hsa-miR-720	-12.5808	0.624318	0.0528548	0.634757	-12.5808	0.814261	0.389658	0.576365	-12.5808	0.721349	0.175856	0.325996
hsa-miR-744-5p	-7.39712	0.84869	0.450873	0.924154	-7.39712	0.675467	0.0721317	0.184473	-7.39712	0.728062	0.145337	0.28268
hsa-miR-744-3p	-12.5779	0.819825	0.423945	0.924154	-12.5779	0.591248	0.0374747	0.121611	-12.5779	0.884231	0.619396	0.758044
hsa-miR-760	-10.8976	0.639226	0.09346	0.720598	-10.8976	0.82312	0.463023	0.643372	-10.8976	0.684118	0.154085	0.292471
hsa-miR-765	-13.4905	1.1902	0.537535	0.955522	-13.4905	1.40809	0.217075	0.392766	-13.4905	1.02195	0.939605	0.970475
hsa-miR-767-5p	-12.4176	0.904411	0.679504	0.962874	-12.4176	1.15717	0.543671	0.720323	-12.4176	0.723596	0.188735	0.340263
hsa-miR-769-3p	-11.5567	1.00685	0.976916	0.990756	-11.5567	1.80653	0.0116722	0.0611573	-11.5567	1.70661	0.0227847	0.0836546
hsa-miR-769-5p	-8.87136	1.22243	0.362588	0.904641	-8.87136	1.65107	0.0235492	0.0904216	-8.87136	1.49433	0.0692398	0.177058
hsa-miR-877-5p	-8.18425	1.0186	0.932138	0.983455	-8.18425	0.667314	0.06262	0.171184	-8.18425	0.622325	0.0292462	0.0972312
hsa-miR-9-5p	-8.65484	1.14946	0.57165	0.960419	-8.65484	1.63597	0.0465271	0.140983	-8.65484	2.05917	0.00367178	0.0234951
hsa-miR-9-3p	-12.4093	1.24311	0.418884	0.924154	-12.4093	0.624522	0.0879874	0.207363	-12.4093	1.0236	0.931351	0.963929
hsa-miR-92a-3p	-6.88867	1.10575	0.651835	0.962874	-6.88867	1.34338	0.18586	0.352784	-6.88867	1.52146	0.0604626	0.162635
hsa-miR-92a-1-5p	-11.8259	0.592432	0.082152	0.720598	-11.8259	0.223723	2.16026e-06	0.000120735	-11.8259	0.19976	4.50482e-07	2.51769e-05
hsa-miR-92b-3p	-8.0561	1.19017	0.450585	0.924154	-8.0561	1.94797	0.00415368	0.0326003	-8.0561	2.22442	0.000617955	0.0063435
hsa-miR-92b-5p	-10.7037	1.57817	0.053266	0.634757	-10.7037	1.42499	0.13302	0.273099	-10.7037	0.839604	0.459864	0.635472
hsa-miR-93-5p	-4.86509	1.00874	0.970228	0.990756	-4.86509	1.41501	0.137386	0.279777	-4.86509	1.59204	0.047014	0.137982
hsa-miR-93-3p	-11.7254	0.632228	0.0886551	0.720598	-11.7254	0.416289	0.00136243	0.016836	-11.7254	0.367527	0.000286261	0.00359973
hsa-miR-934	-14.7373	2.11483	0.0343463	0.575873	-14.7373	0.458167	0.0720378	0.184473	-14.7373	0.0914532	9.98129e-05	0.00147664
hsa-miR-935	-13.5148	1.35416	0.263669	0.904641	-13.5148	1.02425	0.93092	0.956869	-13.5148	0.888792	0.676229	0.803129
hsa-miR-937-3p	-11.7551	1.20433	0.493737	0.940718	-11.7551	1.91977	0.0160544	0.0727392	-11.7551	2.0911	0.00657007	0.0317764
hsa-miR-939-5p	-13.2873	0.790791	0.399158	0.912621	-13.2873	0.857649	0.576875	0.740225	-13.2873	0.609315	0.0820412	0.192835
hsa-miR-940	-12.701	1.1093	0.701761	0.962874	-12.701	0.319623	8.19301e-05	0.002314	-12.701	0.267743	8.63558e-06	0.000255512
hsa-miR-941	-11.01	1.39086	0.178394	0.866492	-11.01	1.61741	0.0499554	0.147809	-11.01	1.08341	0.744015	0.858347
hsa-miR-942-5p	-10.5874	1.24717	0.333056	0.904641	-10.5874	2.07965	0.00140579	0.016836	-10.5874	2.16248	0.000780921	0.00768189
hsa-miR-944	-10.9088	1.13429	0.610789	0.962874	-10.9088	1.08006	0.755667	0.873794	-10.9088	1.10904	0.675973	0.803129
hsa-miR-95-3p	-9.54223	2.2646	0.00465224	0.234008	-9.54223	1.17584	0.570331	0.733881	-9.54223	1.07446	0.801301	0.897371
hsa-miR-96-5p	-6.5347	1.10571	0.645267	0.962874	-6.5347	1.02301	0.916974	0.956869	-6.5347	0.953982	0.8291	0.902678
hsa-miR-98-5p	-7.44621	1.29262	0.286567	0.904641	-7.44621	0.822242	0.416221	0.60334	-7.44621	1.16958	0.515088	0.677144
hsa-miR-99a-5p	-8.61703	1.08345	0.720014	0.962874	-8.61703	1.17715	0.465917	0.645609	-8.61703	1.02197	0.922581	0.962016
hsa-miR-99a-3p	-12.0974	0.760749	0.271169	0.904641	-12.0974	1.45137	0.126245	0.264394	-12.0974	1.07128	0.779087	0.884606
hsa-miR-99b-5p	-4.59699	1.14666	0.619809	0.962874	-4.59699	2.39085	0.00185063	0.0186173	-4.59699	3.08597	6.72493e-05	0.00109726
hsa-miR-99b-3p	-8.83179	0.871534	0.580538	0.962874	-8.83179	1.50983	0.0985699	0.222335	-8.83179	1.39584	0.180737	0.331791

## Sheet: Camps_TableS3
Supplementary table 3
miRNA-SEQ DATA													AGILENT MICROARRAY DATA
miRNA-seq ID	logConc H16h	FC H16h	p-val H16h	adj.p-val H16h	logConc Hyp32h	FC H32h	p-val H32h	adj.p-val H32h	logConc Hyp48h	FC H48h	p-val H48h	adj.p-val H48h	Agilent ID	Average signal H16h	FC H16h	p-val H16h	adj.p-val H16h	Average signal H32h	FC H32h	p-val H32h	adj.p-val H32h	Average signal H48h	FC H48h	p-val H48h	adj.p-val H48h
hsa-let-7a-5p	-2.90896	1.33714	0.236666	0.888381	-2.90896	0.776899	0.303636	0.494268	-2.90896	0.994856	0.983212	0.988485	hsa-let-7a	11.5605	1.00277	0.958301	0.993469	11.5981	1.02924	0.505636	0.660379	11.6147	1.04111	0.322865	0.489141
hsa-let-7a-3p	-10.5127	0.73917	0.216921	0.877037	-10.5127	0.698373	0.142812	0.288492	-10.5127	0.79498	0.348047	0.52259	hsa-let-7a*	2.6539	0.89188	0.343068	0.626203	2.60909	0.864601	0.1864	0.324593	2.67646	0.905933	0.353458	0.514894
hsa-let-7b-5p	-3.91227	0.788532	0.322352	0.904641	-3.91227	0.908183	0.688004	0.827379	-3.91227	1.00473	0.984307	0.988485	hsa-let-7b	9.59913	0.980066	0.679572	0.891387	9.73957	1.08027	0.107266	0.222614	9.75727	1.09361	0.0605961	0.162483
hsa-let-7b-3p	-12.699	0.597734	0.0589107	0.673456	-12.699	0.514222	0.0154031	0.0727392	-12.699	0.651912	0.114859	0.241545	hsa-let-7b*	3.12243	0.957964	0.608124	0.869475	2.94789	0.848801	0.0464823	0.123545	3.00491	0.883024	0.1141	0.248722
hsa-let-7c-5p	-5.82533	0.930749	0.752149	0.962874	-5.82533	0.872328	0.547909	0.720366	-5.82533	0.939794	0.784658	0.888926	hsa-let-7c	8.65811	0.997305	0.951672	0.993469	8.7175	1.03921	0.411484	0.577221	8.74267	1.0575	0.217935	0.371353
hsa-let-7d-5p	-6.34432	1.482	0.137319	0.840474	-6.34432	0.648309	0.101904	0.227811	-6.34432	0.812255	0.431187	0.607526	hsa-let-7d	9.71232	0.980289	0.621418	0.875766	9.73348	0.994776	0.863153	0.937402	9.83719	1.06892	0.0840255	0.203678
hsa-let-7d-3p	-9.31674	0.666555	0.0685401	0.703585	-9.31674	1.09686	0.676625	0.82519	-9.31674	1.55203	0.048093	0.138233	hsa-let-7d*	2.99308	0.885145	0.0292639	0.161217	3.10793	0.95849	0.345212	0.51024	2.96589	0.868618	0.00794536	0.0370376
hsa-let-7e-5p	-5.75703	1.46382	0.121261	0.801004	-5.75703	0.722081	0.185133	0.352735	-5.75703	0.758728	0.260869	0.426029	hsa-let-7e	9.62635	1.05452	0.292112	0.590067	9.73777	1.13918	0.0122288	0.047504	9.75872	1.15585	0.00617052	0.0311235
hsa-let-7f-5p	-3.21521	1.61733	0.0616648	0.674291	-3.21521	0.773275	0.31597	0.50313	-3.21521	0.953369	0.852063	0.915785	hsa-let-7f	11.2218	1.04599	0.413789	0.688891	11.2014	1.03135	0.538474	0.677003	11.198	1.02892	0.535428	0.684888
hsa-let-7f-1-3p	-12.4029	0.584376	0.040792	0.618581	-12.4029	0.367402	0.000205496	0.00395237	-12.4029	0.458698	0.00344543	0.0228033	hsa-let-7f-1*	2.98668	0.913916	0.346865	0.629342	3.07085	0.968824	0.704652	0.821191	3.04818	0.953717	0.568776	0.709214
hsa-let-7g-5p	-5.79195	1.51884	0.0930388	0.720598	-5.79195	0.828218	0.4475	0.631256	-5.79195	0.877349	0.597817	0.742474	hsa-let-7g	8.62432	1.02372	0.589759	0.851037	8.6689	1.05585	0.181215	0.3211	8.64267	1.03682	0.334062	0.496181
hsa-let-7i-5p	-6.38197	1.35076	0.214827	0.877037	-6.38197	0.978495	0.928405	0.956869	-6.38197	0.964934	0.882716	0.93475	hsa-let-7i	8.99403	1.08529	0.122607	0.403804	9.0649	1.13992	0.0131597	0.0498425	9.02508	1.1089	0.0356292	0.107957
hsa-miR-100-5p	-14.1742	1.78674	0.143134	0.840474	-14.1742	1.75022	0.155546	0.304434	-14.1742	3.24237	0.00184649	0.0149787	hsa-miR-100	2.87107	1.07465	0.312437	0.604	2.8733	1.07631	0.254263	0.409797	2.82692	1.04226	0.517537	0.678861
hsa-miR-101-3p	-6.04399	1.02308	0.924437	0.980995	-6.04399	1.78538	0.0167192	0.0729721	-6.04399	1.5132	0.0862171	0.199849	hsa-miR-101	6.23916	0.981852	0.800117	0.947013	6.18369	0.944813	0.387533	0.553879	6.01655	0.841458	0.0228603	0.0805428
hsa-miR-103a-3p	-4.52941	1.3897	0.178162	0.866492	-4.52941	0.878339	0.594894	0.755636	-4.52941	0.804145	0.371886	0.548664	hsa-miR-103	8.2245	0.999046	0.977704	0.993469	8.04646	0.883064	0.0107721	0.0429465	8.15328	0.950928	0.25192	0.408191
hsa-miR-106a-5p	-11.3034	0.700161	0.124211	0.801004	-11.3034	0.553012	0.0111627	0.0591033	-11.3034	0.639936	0.0549143	0.152847	hsa-miR-106a	3.63661	1.03245	0.586385	0.851037	3.29693	0.815853	0.00255578	0.0164466	3.39094	0.870791	0.0219983	0.0784176
hsa-miR-106b-5p	-5.97562	0.880271	0.550674	0.955522	-5.97562	0.921889	0.703453	0.834521	-5.97562	0.89485	0.603114	0.745919	hsa-miR-106b	9.87995	1.01056	0.833158	0.948948	9.87087	1.00422	0.941582	0.977417	9.81278	0.96459	0.430095	0.597792
hsa-miR-107	-9.59114	1.37192	0.227836	0.877037	-9.59114	0.766137	0.309847	0.501135	-9.59114	0.685706	0.151124	0.290194	hsa-miR-107	9.85685	1.01155	0.762376	0.931736	9.78921	0.965223	0.282126	0.442408	9.8955	1.03902	0.242847	0.397744
hsa-miR-10a-5p	-9.89928	0.957693	0.86192	0.962874	-9.89928	1.79256	0.0193298	0.0784104	-9.89928	2.8691	3.09083e-05	0.000681923	hsa-miR-10a	2.93167	0.876306	0.204856	0.510606	2.93708	0.879601	0.169625	0.305932	3.11368	0.994142	0.944507	0.957143
hsa-miR-10b-5p	-14.2308	0.681911	0.284003	0.904641	-14.2308	1.26943	0.462574	0.643372	-14.2308	1.44537	0.254086	0.419405	hsa-miR-10b	2.87898	0.911844	0.286344	0.590067	2.88111	0.913194	0.242285	0.395166	2.83352	0.883557	0.11944	0.249038
hsa-miR-1224-5p	-11.881	0.767749	0.386639	0.904641	-11.881	1.03395	0.912293	0.956869	-11.881	0.797847	0.458948	0.635472	hsa-miR-1224-5p	5.01729	1.27109	0.00764727	0.0662035	5.16554	1.40865	0.00034192	0.00313945	4.96048	1.22201	0.0107277	0.0460688
hsa-miR-125a-3p	-10.593	1.44851	0.123979	0.801004	-10.593	1.10041	0.690853	0.827379	-10.593	1.05668	0.818873	0.897371	hsa-miR-125a-3p	6.01099	1.21787	0.162163	0.463506	5.93963	1.1591	0.236966	0.390221	5.96937	1.18323	0.176782	0.332701
hsa-miR-125a-5p	-6.27695	1.00566	0.980907	0.990756	-6.27695	1.8052	0.0129202	0.0654261	-6.27695	2.21834	0.000855135	0.00796542	hsa-miR-125a-5p	7.05889	1.02179	0.74	0.925945	7.02629	0.998966	0.971643	0.990586	6.91707	0.92613	0.205752	0.362459
hsa-miR-125b-5p	-9.38631	0.924933	0.720215	0.962874	-9.38631	1.22675	0.348204	0.540576	-9.38631	1.05396	0.809302	0.897371	hsa-miR-125b	4.89649	1.10971	0.051394	0.239108	4.90071	1.11296	0.0299827	0.0908477	4.68064	0.955499	0.313926	0.485304
hsa-miR-125b-2-3p	-9.67501	1.06958	0.76011	0.962874	-9.67501	1.69446	0.0171027	0.073527	-9.67501	1.26043	0.293664	0.464506	hsa-miR-125b-2*	3.38174	1.04787	0.641079	0.882941	3.42684	1.08115	0.395082	0.562018	3.34052	1.01836	0.84001	0.91523
hsa-miR-126-3p	-7.63795	1.1697	0.475165	0.926177	-7.63795	1.02325	0.916566	0.956869	-7.63795	1.1167	0.614991	0.756334	hsa-miR-126	3.82833	1.01347	0.803352	0.947143	3.79962	0.993502	0.886765	0.941004	3.80092	0.994396	0.914792	0.942602
hsa-miR-126-5p	-9.23729	0.875544	0.558496	0.955522	-9.23729	0.642847	0.0527427	0.155144	-9.23729	0.735064	0.176284	0.325996	hsa-miR-126*	2.92509	0.986	0.905132	0.972536	2.93732	0.994395	0.958491	0.987832	2.98124	1.02513	0.813844	0.890234
hsa-miR-128-3p	-8.99492	0.873525	0.536389	0.955522	-8.99492	0.81873	0.360685	0.551329	-8.99492	0.87839	0.55326	0.709923	hsa-miR-128	5.91191	0.911753	0.0651043	0.259561	5.91545	0.913988	0.0464116	0.123545	5.9228	0.918658	0.0631903	0.167953
hsa-miR-129-5p	-12.352	0.935413	0.797847	0.962874	-12.352	1.8475	0.0162324	0.0727392	-12.352	1.47755	0.128341	0.259259	hsa-miR-129*	2.49204	0.800481	0.0084224	0.0708885	2.86734	1.03831	0.545775	0.680534	2.83619	1.01613	0.805736	0.889193
hsa-miR-130b-3p	-9.30621	1.08435	0.720487	0.962874	-9.30621	0.96532	0.876066	0.942094	-9.30621	0.956537	0.844372	0.911415	hsa-miR-130b	5.82874	0.90098	0.0176539	0.118366	5.70605	0.827525	0.000176207	0.00179882	5.88699	0.938102	0.0867912	0.205451
hsa-miR-134-5p	-13.9851	1.13278	0.692346	0.962874	-13.9851	1.52352	0.166217	0.322807	-13.9851	0.571585	0.104855	0.230316	hsa-miR-134	6.51478	1.63606	9.88888e-06	0.000998777	6.96991	2.24289	3.48384e-08	4.35823e-06	6.68361	1.83917	4.9508e-07	3.75023e-05
hsa-miR-135a-5p	-10.6836	1.39996	0.229624	0.877037	-10.6836	0.546264	0.0325064	0.110478	-10.6836	0.602186	0.0722492	0.179236	hsa-miR-135a	2.97257	0.997523	0.974122	0.993469	2.98183	1.00394	0.943923	0.977417	3.01486	1.0272	0.64544	0.776064
hsa-miR-135b-5p	-10.7274	1.24911	0.365303	0.904641	-10.7274	0.70288	0.153363	0.303707	-10.7274	0.622374	0.0557245	0.153166	hsa-miR-135b	3.75437	0.921782	0.132661	0.42727	3.84131	0.979036	0.636638	0.771605	3.77171	0.932924	0.15133	0.299692
hsa-miR-140-3p	-7.18144	1.11422	0.65978	0.962874	-7.18144	2.20805	0.00144893	0.0169491	-7.18144	2.00653	0.00498863	0.0272748	hsa-miR-140-3p	4.76651	0.977605	0.766467	0.931736	4.98544	1.1378	0.0838894	0.184642	4.86919	1.04972	0.476346	0.644343
hsa-miR-140-5p	-9.80945	1.30787	0.233702	0.883852	-9.80945	1.11999	0.614813	0.769456	-9.80945	1.02028	0.92898	0.963457	hsa-miR-140-5p	3.21552	1.18413	0.010365	0.0826473	3.13915	1.12308	0.0367027	0.103934	3.13458	1.11952	0.0414359	0.123089
hsa-miR-141-3p	-4.97803	1.5739	0.112636	0.801004	-4.97803	0.633442	0.110281	0.241242	-4.97803	0.654035	0.137307	0.268738	hsa-miR-141	8.98641	1.15694	0.0782532	0.303983	8.96038	1.13626	0.0851728	0.184642	8.89979	1.08952	0.217915	0.371353
hsa-miR-141-5p	-8.57775	1.25569	0.295249	0.904641	-8.57775	1.7792	0.00841827	0.0492371	-8.57775	1.93382	0.00261449	0.018787	hsa-miR-141*	3.31019	1.1061	0.16521	0.463506	3.4419	1.21183	0.00976931	0.0411125	3.34452	1.13273	0.0659207	0.172767
hsa-miR-142-3p	-12.9377	0.989482	0.966279	0.990756	-12.9377	0.756735	0.271739	0.457139	-12.9377	0.940568	0.807351	0.897371	hsa-miR-142-3p	2.72477	0.884194	0.2068	0.510606	2.65414	0.841947	0.0608827	0.152458	2.64647	0.83748	0.0532664	0.145403
hsa-miR-146b-5p	-7.65827	1.251	0.359698	0.904641	-7.65827	1.80945	0.0159075	0.0727392	-7.65827	2.42848	0.000348033	0.00397865	hsa-miR-146b-5p	3.21328	0.924769	0.267556	0.570866	3.31092	0.989519	0.86097	0.937402	3.39347	1.04779	0.448147	0.617221
hsa-miR-148a-3p	-6.73423	1.12218	0.629276	0.962874	-6.73423	1.41052	0.150604	0.301661	-6.73423	1.56247	0.0626211	0.166658	hsa-miR-148a	4.57228	0.919675	0.144908	0.450322	4.58422	0.927318	0.139232	0.267353	4.69603	1.00204	0.951303	0.957624
hsa-miR-148b-3p	-6.63926	1.18253	0.460512	0.924154	-6.63926	1.3274	0.212991	0.39045	-6.63926	1.01228	0.957137	0.98155	hsa-miR-148b	4.86647	0.924998	0.052083	0.239108	4.82226	0.897081	0.00618177	0.0297314	4.82044	0.895948	0.00633873	0.0311235
hsa-miR-149-5p	-7.74825	0.903265	0.640424	0.962874	-7.74825	1.09048	0.690822	0.827379	-7.74825	0.835635	0.409942	0.590033	hsa-miR-149	5.558	0.8691	0.0443314	0.216652	5.41049	0.78463	0.00121375	0.00967805	4.93018	0.562441	9.40009e-07	4.06889e-05
hsa-miR-151a-3p	-5.73844	1.3541	0.267672	0.904641	-5.73844	2.46938	0.00112243	0.0144764	-5.73844	2.33903	0.00215418	0.0168795	hsa-miR-151-3p	6.25288	1.06199	0.154698	0.459545	6.2926	1.09163	0.0317484	0.094659	6.2948	1.0933	0.0263033	0.0895493
hsa-miR-151a-5p	-8.52814	1.0713	0.767781	0.962874	-8.52814	0.757755	0.235158	0.413795	-8.52814	0.680882	0.100529	0.225002	hsa-miR-151-5p	7.9076	1.01037	0.792674	0.947013	7.96978	1.05487	0.144438	0.27353	7.90272	1.00696	0.80479	0.889193
hsa-miR-152-3p	-8.51777	1.22345	0.382875	0.904641	-8.51777	1.67913	0.0255583	0.0945283	-8.51777	1.5228	0.069532	0.177058	hsa-miR-152	2.86965	1.01175	0.861293	0.954165	3.02367	1.12574	0.0768211	0.176339	3.05385	1.14953	0.0429407	0.126321
hsa-miR-155-5p	-12.656	1.87648	0.0149209	0.408812	-12.656	1.62829	0.0599955	0.166728	-12.656	2.0883	0.00433407	0.0254537	hsa-miR-155	2.8357	0.960391	0.564319	0.839677	2.9297	1.02505	0.683784	0.807238	2.88568	0.994246	0.917183	0.942602
hsa-miR-15a-5p	-8.1629	0.92359	0.710432	0.962874	-8.1629	0.89226	0.59444	0.755636	-8.1629	0.918516	0.691371	0.816337	hsa-miR-15a	8.04352	1.05408	0.366558	0.646845	8.04999	1.05882	0.283258	0.442408	8.01332	1.03225	0.517548	0.678861
hsa-miR-15b-5p	-9.37961	1.40562	0.162748	0.86171	-9.37961	0.781786	0.312803	0.502684	-9.37961	0.901617	0.670729	0.803129	hsa-miR-15b	9.03902	0.920743	0.0519504	0.239108	9.02351	0.910896	0.0185464	0.0624397	9.11844	0.97285	0.457172	0.625014
hsa-miR-15b-3p	-12.4549	0.916095	0.76476	0.962874	-12.4549	0.315305	0.000182644	0.00395237	-12.4549	0.355534	0.000743204	0.00747663	hsa-miR-15b*	2.58931	0.8431	0.108219	0.368429	2.59696	0.847587	0.0853919	0.184642	2.65978	0.885308	0.184409	0.342797
hsa-miR-16-5p	-7.91955	1.55993	0.0516445	0.634757	-7.91955	0.963189	0.869113	0.941995	-7.91955	1.0388	0.867174	0.924128	hsa-miR-16	9.61134	1.0262	0.544091	0.824298	9.63144	1.0406	0.311488	0.476672	9.68897	1.08293	0.0494184	0.137428
hsa-miR-16-2-3p	-11.1969	1.05226	0.839796	0.962874	-11.1969	0.787041	0.34377	0.537007	-11.1969	0.832604	0.468809	0.642536	hsa-miR-16-2*	3.7381	1.07384	0.133963	0.42727	3.75938	1.0898	0.0535749	0.138745	3.7958	1.11766	0.0171166	0.0648291
hsa-miR-17-5p	-7.15978	1.02892	0.894112	0.967179	-7.15978	0.823864	0.366121	0.554696	-7.15978	0.945538	0.793775	0.893218	hsa-miR-17	6.06847	1.0567	0.333606	0.612622	5.75608	0.850968	0.00717936	0.0329598	5.86448	0.917372	0.108945	0.242732
hsa-miR-17-3p	-9.96666	0.931862	0.754198	0.962874	-9.96666	1.06117	0.792071	0.890434	-9.96666	0.903429	0.652394	0.790733	hsa-miR-17*	4.25705	0.858034	0.0112918	0.0873626	4.15636	0.800192	0.000489272	0.0042357	4.13069	0.786081	0.000284402	0.0027798
hsa-miR-181a-5p	-5.58507	1.14164	0.53772	0.955522	-5.58507	1.56535	0.0378169	0.121935	-5.58507	1.76825	0.00841203	0.0388188	hsa-miR-181a	6.92175	1.04864	0.31025	0.604	7.09103	1.17919	0.00196043	0.0135002	7.22398	1.29302	6.33726e-05	0.00092607
hsa-miR-181a-3p	-8.57714	0.72791	0.158973	0.859036	-8.57714	1.16406	0.499508	0.67723	-8.57714	1.41874	0.12072	0.248661	hsa-miR-181a*	4.21406	0.736498	0.00196422	0.0283409	4.34453	0.80621	0.00830205	0.035936	4.61935	0.975386	0.723381	0.830244
hsa-miR-181b-5p	-5.83304	1.05109	0.832135	0.962874	-5.83304	1.83383	0.0104554	0.0565489	-5.83304	2.09386	0.00187606	0.0149787	hsa-miR-181b	6.01289	1.01672	0.73596	0.925945	5.99954	1.00735	0.882229	0.941004	6.14153	1.11153	0.0291806	0.0950723
hsa-miR-181c-5p	-10.4339	1.1269	0.586187	0.962874	-10.4339	1.22862	0.348009	0.540576	-10.4339	1.19742	0.411733	0.590033	hsa-miR-181c	3.9298	0.985087	0.813812	0.948948	3.9665	1.01047	0.861675	0.937402	4.00131	1.03514	0.540225	0.684888
hsa-miR-181d-5p	-9.57875	0.863453	0.533563	0.955522	-9.57875	1.26295	0.321943	0.510843	-9.57875	1.22112	0.396674	0.575005	hsa-miR-181d	3.64761	0.937717	0.195625	0.494271	3.60529	0.910608	0.0463649	0.123545	3.78582	1.032	0.457931	0.625014
hsa-miR-182-5p	-3.90605	1.26672	0.375025	0.904641	-3.90605	1.8213	0.0253762	0.0945283	-3.90605	2.15586	0.00435414	0.0254537	hsa-miR-182	5.42104	0.934774	0.194908	0.494271	5.27043	0.842113	0.00262917	0.0164466	5.17305	0.787143	0.000265603	0.00268259
hsa-miR-182-3p	-13.8462	0.564849	0.0630252	0.674504	-13.8462	0.478056	0.017817	0.0750129	-13.8462	0.468254	0.0160922	0.0627471	hsa-miR-182*	3.00847	0.896638	0.0439602	0.216652	2.91105	0.838092	0.00187002	0.0131771	2.82891	0.791708	0.000242587	0.00260744
hsa-miR-183-5p	-4.75393	1.10939	0.665482	0.962874	-4.75393	1.5437	0.0715909	0.184473	-4.75393	1.7372	0.0222344	0.0828439	hsa-miR-183	7.59639	0.843771	0.00543344	0.0498888	7.67307	0.889832	0.0212082	0.0698486	7.69937	0.906196	0.0482527	0.137428
hsa-miR-183-3p	-8.67373	0.843105	0.435226	0.924154	-8.67373	0.972678	0.899131	0.949579	-8.67373	1.12412	0.592466	0.740318	hsa-miR-183*	3.84012	0.925949	0.109959	0.370197	3.74541	0.867112	0.00442385	0.0239362	3.62608	0.798275	0.000181561	0.00203751
hsa-miR-185-5p	-7.75759	1.05698	0.824684	0.962874	-7.75759	0.62561	0.0620051	0.170859	-7.75759	0.525413	0.0107586	0.046253	hsa-miR-185	6.25052	0.931669	0.0941367	0.345538	6.17857	0.886344	0.00532771	0.0269049	6.16984	0.880995	0.00443059	0.0244085
hsa-miR-186-5p	-6.70287	0.956635	0.842622	0.962874	-6.70287	1.37879	0.151131	0.301661	-6.70287	1.44671	0.0990773	0.22428	hsa-miR-186	4.2593	0.894439	0.029042	0.161217	4.23644	0.88038	0.00845257	0.0360723	4.34047	0.946204	0.194676	0.352729
hsa-miR-188-5p	-10.6931	0.802368	0.329421	0.904641	-10.6931	1.28258	0.268232	0.452754	-10.6931	1.08312	0.722652	0.845335	hsa-miR-188-5p	4.54498	1.18341	0.011533	0.0873626	4.65676	1.27874	0.000513643	0.00432316	4.52071	1.16366	0.010795	0.0460688
hsa-miR-18a-5p	-7.90946	0.759041	0.197919	0.866492	-7.90946	0.60961	0.0212715	0.0842486	-7.90946	0.719452	0.124401	0.254365	hsa-miR-18a	4.62534	0.873898	0.0322355	0.171357	4.32458	0.709451	3.22782e-05	0.000605389	4.41435	0.754995	0.000174717	0.00203612
hsa-miR-18b-5p	-13.9958	0.9147	0.760068	0.962874	-13.9958	0.775248	0.389278	0.576365	-13.9958	0.494996	0.0269459	0.0922027	hsa-miR-18b	4.03793	0.941391	0.33041	0.612622	3.91058	0.861851	0.017797	0.0612785	4.04569	0.946464	0.326254	0.489382
hsa-miR-190a-5p	-10.2106	1.04132	0.858273	0.962874	-10.2106	0.737779	0.181308	0.34676	-10.2106	0.671799	0.0810681	0.192835	hsa-miR-190	2.83193	0.9563	0.367186	0.646845	2.91867	1.01556	0.717523	0.827373	2.77876	0.921697	0.0775803	0.194934
hsa-miR-191-3p	-10.9784	0.745728	0.187943	0.866492	-10.9784	0.854827	0.479921	0.657767	-10.9784	0.775456	0.253467	0.419405	hsa-miR-191*	3.80345	0.841526	0.0608703	0.256508	3.83616	0.860828	0.0666292	0.161804	3.77927	0.827542	0.0270843	0.0908707
hsa-miR-192-5p	-7.23779	1.33016	0.197472	0.866492	-7.23779	2.14352	0.000649095	0.00989379	-7.23779	2.24455	0.000304959	0.00374133	hsa-miR-192	4.27536	1.15821	0.0226171	0.137059	4.37026	1.23695	0.00144214	0.0109242	4.44177	1.29981	0.000301309	0.00285302
hsa-miR-193a-3p	-10.7737	1.08681	0.737648	0.962874	-10.7737	0.634977	0.0696299	0.183371	-10.7737	0.482665	0.00394977	0.0245276	hsa-miR-193a-3p	6.76515	1.03175	0.701071	0.90767	6.72193	1.00131	0.996201	0.996201	6.32018	0.757927	0.00276089	0.016731
hsa-miR-193a-5p	-9.17393	0.72846	0.19924	0.866492	-9.17393	0.581794	0.028848	0.101472	-9.17393	0.507825	0.0064473	0.0314853	hsa-miR-193a-5p	3.95143	1.12364	0.0183604	0.118366	4.07012	1.21998	0.000319818	0.00302828	4.09989	1.24542	0.000141606	0.00171627
hsa-miR-193b-3p	-7.88422	1.41326	0.179016	0.866492	-7.88422	1.00315	0.990242	0.996183	-7.88422	0.926404	0.765986	0.877656	hsa-miR-193b	8.97392	1.23272	0.00068353	0.0188281	9.23653	1.47883	1.399e-06	6.05569e-05	9.27156	1.51517	7.54427e-07	3.94134e-05
hsa-miR-193b-5p	-9.51373	1.05935	0.797501	0.962874	-9.51373	0.834727	0.421871	0.609774	-9.51373	0.680844	0.0884335	0.203114	hsa-miR-193b*	3.86573	1.20467	0.00254333	0.0308252	4.02024	1.34085	3.5682e-05	0.000605389	4.1953	1.51384	1.60033e-06	5.38778e-05
hsa-miR-194-5p	-8.57551	1.09019	0.725887	0.962874	-8.57551	1.95897	0.00678085	0.0426346	-8.57551	2.28064	0.000949924	0.00853235	hsa-miR-194	4.48876	1.0651	0.303617	0.601281	4.62031	1.16678	0.0143443	0.0530041	4.68151	1.21735	0.0034422	0.019679
hsa-miR-195-5p	-11.8843	2.13197	0.0018494	0.116281	-11.8843	1.2656	0.333949	0.524926	-11.8843	1.70318	0.028605	0.0959222	hsa-miR-195	6.37487	1.08233	0.148023	0.450544	6.4497	1.13996	0.0160282	0.0571358	6.57471	1.24314	0.000642841	0.00486952
hsa-miR-196a-5p	-6.52298	1.0728	0.775654	0.962874	-6.52298	1.51609	0.0925916	0.211606	-6.52298	2.30296	0.000848182	0.00796542	hsa-miR-196a	3.94944	0.991224	0.840107	0.948948	3.89761	0.956248	0.257498	0.412815	4.05348	1.06535	0.119999	0.249038
hsa-miR-196b-5p	-10.667	1.15701	0.542921	0.955522	-10.667	1.62699	0.0425357	0.133721	-10.667	1.79942	0.0145496	0.0590197	hsa-miR-196b	2.86335	0.928227	0.423429	0.697278	2.89441	0.948428	0.522835	0.668435	2.87391	0.935049	0.413066	0.57944
hsa-miR-197-3p	-10.0038	1.14162	0.574724	0.960419	-10.0038	0.811548	0.377216	0.564702	-10.0038	1.27166	0.308869	0.478402	hsa-miR-197	5.09359	1.00052	0.994531	0.996277	5.31568	1.16702	0.0074913	0.0338786	5.2809	1.13923	0.0170355	0.0648291
hsa-miR-19a-3p	-9.00139	1.59396	0.178334	0.866492	-9.00139	0.37144	0.00489652	0.0362199	-9.00139	0.367773	0.00450374	0.0254537	hsa-miR-19a	7.68397	1.00921	0.885934	0.964761	7.60934	0.958329	0.4369	0.604479	7.61086	0.95934	0.473827	0.64381
hsa-miR-19b-3p	-8.38755	1.55497	0.203341	0.866492	-8.38755	0.330364	0.00177145	0.0181845	-8.38755	0.339133	0.00224836	0.0168795	hsa-miR-19b	9.16838	1.03262	0.566297	0.839677	9.12577	1.00257	0.975295	0.990586	9.09383	0.980614	0.713786	0.826985
hsa-miR-19b-1-5p	-13.1188	0.529658	0.0209559	0.47276	-13.1188	0.331811	0.000108388	0.00259615	-13.1188	0.309057	4.9551e-05	0.000890148	hsa-miR-19b-1*	2.53366	0.811093	0.0360269	0.181936	2.68174	0.898768	0.20013	0.340671	2.62617	0.864807	0.086746	0.205451
hsa-miR-200a-3p	-7.1111	1.08166	0.71945	0.962874	-7.1111	1.04665	0.834727	0.916742	-7.1111	1.05369	0.810847	0.897371	hsa-miR-200a	7.53705	1.11083	0.0345894	0.177637	7.57084	1.13715	0.00764893	0.0340827	7.60937	1.16793	0.00217492	0.0143261
hsa-miR-200a-5p	-10.6208	1.00662	0.978123	0.990756	-10.6208	1.60461	0.0494922	0.147305	-10.6208	1.45544	0.118743	0.247833	hsa-miR-200a*	2.90902	0.997229	0.961822	0.993469	2.90572	0.994953	0.910614	0.958042	2.80837	0.930031	0.10975	0.242732
hsa-miR-200b-3p	-6.67521	1.00557	0.980075	0.990756	-6.67521	0.875475	0.549941	0.720366	-6.67521	1.03899	0.863416	0.924039	hsa-miR-200b	7.41453	1.0365	0.359457	0.644471	7.43204	1.04916	0.186051	0.324593	7.48122	1.08554	0.0300833	0.0969707
hsa-miR-200b-5p	-9.53726	0.96654	0.875988	0.962874	-9.53726	1.01849	0.93301	0.956869	-9.53726	1.02108	0.923765	0.962016	hsa-miR-200b*	2.85086	0.993657	0.946611	0.993469	2.80953	0.965596	0.641325	0.773817	2.83029	0.979591	0.777278	0.877118
hsa-miR-200c-3p	-3.50003	1.02484	0.911305	0.977369	-3.50003	1.04923	0.827326	0.916071	-3.50003	1.30288	0.230395	0.395525	hsa-miR-200c	8.32324	0.971868	0.463242	0.746608	8.24702	0.92185	0.0350686	0.102171	8.36735	1.00204	0.919318	0.942602
hsa-miR-203a	-4.14258	1.21199	0.418735	0.924154	-4.14258	1.93402	0.00592821	0.0397585	-4.14258	1.92679	0.00621219	0.0306346	hsa-miR-203	7.91271	1.23321	0.00254322	0.0308252	7.87791	1.20381	0.00279447	0.0167023	7.72366	1.08175	0.119004	0.249038
hsa-miR-205-5p	-8.42849	0.929618	0.7349	0.962874	-8.42849	0.914275	0.677542	0.82519	-8.42849	0.754891	0.192805	0.345128	hsa-miR-205	7.70188	0.848369	0.00348704	0.0377348	7.61912	0.801073	0.000184084	0.00179928	7.17542	0.588986	8.30935e-08	8.39245e-06
hsa-miR-20a-5p	-6.04207	1.09547	0.700486	0.962874	-6.04207	0.613503	0.0402374	0.128097	-6.04207	0.701671	0.135966	0.268738	hsa-miR-20a	7.19971	1.10246	0.0636965	0.259561	7.0576	0.999041	0.963559	0.98963	7.0495	0.993447	0.904051	0.942602
hsa-miR-20a-3p	-12.8667	0.606798	0.0471258	0.623797	-12.8667	0.481718	0.00421276	0.0326003	-12.8667	0.587021	0.0349008	0.109719	hsa-miR-20a*	4.03856	0.731421	0.000175812	0.00761017	4.08639	0.756078	0.000173737	0.00179882	4.07387	0.749547	0.000140654	0.00171627
hsa-miR-20b-5p	-11.6473	0.725228	0.158856	0.859036	-11.6473	0.753307	0.212916	0.39045	-11.6473	0.840035	0.442732	0.615178	hsa-miR-20b	5.56498	1.07782	0.133565	0.42727	5.44142	0.989355	0.783242	0.879213	5.39713	0.959443	0.348749	0.510488
hsa-miR-21-5p	-0.501142	1.23495	0.325877	0.904641	-0.501142	1.28722	0.239998	0.419163	-0.501142	1.4078	0.111847	0.240422	hsa-miR-21	14.4542	1.1131	0.0859615	0.325579	14.4571	1.11539	0.0564311	0.144126	14.4793	1.13265	0.0306452	0.0977422
hsa-miR-21-3p	-6.87643	0.944522	0.789086	0.962874	-6.87643	1.16028	0.486133	0.662669	-6.87643	1.05844	0.790105	0.891082	hsa-miR-21*	8.17442	1.09611	0.163926	0.463506	8.04687	1.00336	0.966768	0.98963	8.025	0.98827	0.853317	0.916862
hsa-miR-210-3p	-7.78788	3.2423	6.71273e-07	0.00011255	-7.78788	4.03383	5.42304e-09	5.46e-07	-7.78788	3.95955	8.36347e-09	8.41e-07	hsa-miR-210	7.93097	3.2972	9.49301e-11	2.87638e-08	8.55122	5.06826	1.4506e-12	4.39531e-10	8.83139	6.15459	4.6108e-13	1.39707e-10
hsa-miR-212-3p	-13.4005	1.57216	0.118879	0.801004	-13.4005	0.92346	0.790726	0.890434	-13.4005	1.4223	0.228363	0.394731	hsa-miR-212	4.7886	1.03063	0.746405	0.926888	4.76295	1.01246	0.888208	0.941004	4.75375	1.00603	0.933407	0.949069
hsa-miR-215-5p	-12.1918	1.28203	0.352433	0.904641	-12.1918	2.91513	5.31025e-05	0.00166941	-12.1918	2.23422	0.0023889	0.0176708	hsa-miR-215	3.91991	1.09327	0.0855826	0.325579	4.17785	1.3073	7.74461e-05	0.00106664	4.08911	1.22932	0.000571774	0.00444224
hsa-miR-218-5p	-12.6789	1.28061	0.360047	0.904641	-12.6789	0.9977	0.993247	0.997212	-12.6789	0.746731	0.291713	0.462942	hsa-miR-218	2.75611	1.09673	0.290555	0.590067	2.7353	1.08103	0.315799	0.48084	2.76233	1.10147	0.226273	0.377129
hsa-miR-219-5p	-14.0973	0.791202	0.445475	0.924154	-14.0973	0.504398	0.0335557	0.112524	-14.0973	0.47996	0.0254929	0.0890483	hsa-miR-219-5p	4.34396	1.01972	0.637984	0.88269	4.46757	1.11093	0.015511	0.0566245	4.41266	1.06945	0.0877898	0.206204
hsa-miR-22-3p	-8.45912	1.39351	0.298688	0.904641	-8.45912	0.40994	0.00589622	0.0397585	-8.45912	0.401393	0.00485874	0.0268566	hsa-miR-22	7.12806	0.954968	0.500033	0.779659	7.13816	0.961672	0.514403	0.666086	7.20086	1.00439	0.923937	0.942602
hsa-miR-221-3p	-9.72319	0.724673	0.147809	0.840957	-9.72319	0.864879	0.513115	0.686428	-9.72319	0.574957	0.0133249	0.0549378	hsa-miR-221	3.77342	0.987068	0.838302	0.948948	3.56975	0.85711	0.0181491	0.0617887	3.38724	0.755258	0.000441918	0.00361895
hsa-miR-221-5p	-10.9497	0.818134	0.366373	0.904641	-10.9497	0.541154	0.00623253	0.0412495	-10.9497	0.36428	1.00002e-05	0.000264743	hsa-miR-221*	2.47222	0.699364	0.000923592	0.0188537	2.71936	0.830043	0.0217998	0.070384	2.72644	0.834122	0.0240523	0.0837684
hsa-miR-222-3p	-9.81328	0.915653	0.713772	0.962874	-9.81328	0.584282	0.0263028	0.0958718	-9.81328	0.384089	9.58756e-05	0.00146138	hsa-miR-222	3.94813	1.06265	0.311705	0.604	3.88164	1.01478	0.786358	0.879213	3.6526	0.865818	0.0181819	0.0680139
hsa-miR-23a-3p	-6.9437	0.999231	0.997401	0.997401	-6.9437	0.65778	0.0772255	0.192534	-6.9437	0.863961	0.536028	0.696182	hsa-miR-23a	11.0533	1.04129	0.609093	0.869475	11.2448	1.18909	0.0296027	0.0906023	11.3249	1.25696	0.00685243	0.0329569
hsa-miR-23a-5p	-14.0191	0.346405	0.00402995	0.225229	-14.0191	0.304659	0.00138302	0.016836	-14.0191	0.1575	6.26874e-06	0.000197073	hsa-miR-23a*	4.36883	0.969725	0.657849	0.885528	4.17831	0.849757	0.0218353	0.070384	4.29217	0.919541	0.197901	0.352729
hsa-miR-23b-3p	-7.20858	0.777252	0.26419	0.904641	-7.20858	0.584554	0.0178894	0.0750129	-7.20858	0.793225	0.304601	0.474348	hsa-miR-23b	10.3697	0.944904	0.193301	0.494271	10.3303	0.919479	0.0423479	0.117719	10.4554	1.00278	0.909	0.942602
hsa-miR-23b-5p	-11.7745	0.463653	0.000726882	0.0593501	-11.7745	0.42971	0.000212155	0.00395237	-11.7745	0.426667	0.000194901	0.0026496	hsa-miR-23b*	3.39073	0.685097	0.000165225	0.00761017	3.42252	0.700362	0.000108023	0.00136379	3.55939	0.770058	0.00114006	0.00822473
hsa-miR-24-3p	-4.05627	1.22155	0.386675	0.904641	-4.05627	0.898864	0.644445	0.798901	-4.05627	1.07968	0.739997	0.857475	hsa-miR-24	10.0492	1.0373	0.361779	0.644818	10.0189	1.01579	0.676071	0.803331	10.1859	1.14043	0.00285217	0.0169452
hsa-miR-24-1-5p	-11.3299	1.15525	0.611092	0.962874	-11.3299	0.377443	0.000846863	0.0121706	-11.3299	0.530068	0.0275838	0.0937475	hsa-miR-24-1*	3.68627	0.857453	0.0211334	0.130682	3.65528	0.839229	0.00578785	0.0287495	3.69757	0.864197	0.0159562	0.0643746
hsa-miR-25-3p	-7.84098	1.08065	0.720508	0.962874	-7.84098	1.39862	0.122498	0.257809	-7.84098	1.40803	0.11525	0.241545	hsa-miR-25	7.49466	0.968145	0.6684	0.885528	7.56164	1.01415	0.847842	0.934606	7.37506	0.891121	0.116326	0.249038
hsa-miR-25-5p	-10.8191	1.35843	0.279924	0.904641	-10.8191	0.50169	0.016285	0.0727392	-10.8191	0.246098	2.3857e-06	0.0001	hsa-miR-25*	2.95253	0.871735	0.0642756	0.259561	2.90533	0.843676	0.0162206	0.0571493	2.69488	0.72916	0.000311908	0.00286388
hsa-miR-26a-5p	-7.00219	1.42542	0.14659	0.840957	-7.00219	0.831087	0.447794	0.631256	-7.00219	0.838962	0.471251	0.644128	hsa-miR-26a	7.04147	1.05345	0.388109	0.668165	7.0253	1.04171	0.455359	0.621504	7.03541	1.04903	0.359495	0.5187
hsa-miR-26b-5p	-7.6561	1.25253	0.336272	0.904641	-7.6561	0.783387	0.297327	0.490346	-7.6561	0.854619	0.502126	0.66641	hsa-miR-26b	8.71838	1.08269	0.0941115	0.345538	8.8021	1.14738	0.00509012	0.0265357	8.67775	1.05263	0.197874	0.352729
hsa-miR-27a-3p	-5.68935	1.28574	0.244869	0.904641	-5.68935	1.35971	0.155367	0.304434	-5.68935	1.37995	0.136528	0.268738	hsa-miR-27a	10.071	1.19897	0.00499154	0.0487882	10.2416	1.34946	5.92872e-05	0.00085543	10.2338	1.34219	6.41831e-05	0.00092607
hsa-miR-27b-3p	-4.77816	1.07531	0.734623	0.962874	-4.77816	1.20382	0.386782	0.575596	-4.77816	1.30438	0.21539	0.380144	hsa-miR-27b	9.04213	1.03155	0.547264	0.82498	9.00723	1.0069	0.897403	0.947432	9.09966	1.07352	0.131447	0.268155
hsa-miR-28-5p	-9.29684	1.15557	0.543624	0.955522	-9.29684	0.896726	0.647123	0.799762	-9.29684	0.874286	0.572754	0.722043	hsa-miR-28-5p	4.93153	1.019	0.656843	0.885528	4.96046	1.03965	0.321271	0.486725	4.96376	1.04202	0.274699	0.439684
hsa-miR-296-5p	-11.2183	0.950129	0.822114	0.962874	-11.2183	0.894625	0.624635	0.777701	-11.2183	0.878262	0.56899	0.722043	hsa-miR-296-5p	3.71474	0.821139	0.0135029	0.097414	3.74034	0.835842	0.0121827	0.047504	3.75324	0.843348	0.0161468	0.0643746
hsa-miR-29a-3p	-7.71081	1.05113	0.824779	0.962874	-7.71081	0.967229	0.882381	0.943421	-7.71081	0.992028	0.97165	0.985363	hsa-miR-29a	7.26033	0.986858	0.818158	0.948948	7.24555	0.976802	0.643571	0.773817	7.18615	0.937398	0.245856	0.400507
hsa-miR-29b-3p	-7.99838	0.939099	0.791976	0.962874	-7.99838	0.532162	0.00864133	0.0499608	-7.99838	0.555466	0.0142847	0.0584163	hsa-miR-29b	6.05395	1.00115	0.989184	0.995757	5.93834	0.924056	0.198663	0.340085	5.79666	0.83762	0.0125573	0.0528454
hsa-miR-29b-1-5p	-11.2612	0.413923	0.000292616	0.0294372	-11.2612	0.52957	0.00829116	0.0492371	-11.2612	0.636173	0.0590158	0.160459	hsa-miR-29b-1*	3.18508	0.760879	0.0190044	0.119965	3.28844	0.817389	0.0438896	0.120896	3.2033	0.770548	0.0136856	0.0568045
hsa-miR-29c-3p	-9.89867	1.37208	0.221495	0.877037	-9.89867	0.840891	0.502915	0.678796	-9.89867	0.788703	0.359318	0.534724	hsa-miR-29c	6.7437	1.05121	0.406811	0.685325	6.74518	1.05229	0.352639	0.516182	6.71766	1.03241	0.531054	0.684888
hsa-miR-29c-5p	-11.3295	0.993873	0.977989	0.990756	-11.3295	0.912895	0.682611	0.827379	-11.3295	1.05414	0.812772	0.897371	hsa-miR-29c*	3.33098	1.0168	0.715946	0.915323	3.51014	1.15124	0.00596825	0.0291674	3.49169	1.13661	0.0100117	0.0439645
hsa-miR-301a-3p	-9.1327	0.653102	0.122833	0.801004	-9.1327	0.474945	0.00745653	0.0457395	-9.1327	0.583636	0.051694	0.146079	hsa-miR-301a	9.20138	0.881362	0.0161793	0.111417	9.18362	0.870584	0.00516702	0.0265357	9.44385	1.04267	0.296152	0.462547
hsa-miR-301b	-11.8365	0.631225	0.0945517	0.720598	-11.8365	0.54462	0.027957	0.0991752	-11.8365	0.685728	0.169453	0.316858	hsa-miR-301b	4.63383	0.80243	0.000271576	0.0102859	4.60378	0.785891	5.21898e-05	0.000790675	4.91712	0.976534	0.543652	0.68636
hsa-miR-30a-5p	-8.12678	1.3166	0.246675	0.904641	-8.12678	2.05991	0.00255132	0.0231687	-8.12678	1.44009	0.124947	0.254446	hsa-miR-30a	4.654	1.12925	0.0180083	0.118366	4.65519	1.13018	0.0100869	0.0417102	4.57424	1.06851	0.111558	0.244942
hsa-miR-30b-5p	-8.76933	0.931924	0.774155	0.962874	-8.76933	0.502132	0.00551227	0.0385093	-8.76933	0.603469	0.0409444	0.125579	hsa-miR-30b	7.86746	1.20576	0.00106014	0.0200764	8.07708	1.39432	3.93467e-06	0.000119221	8.14206	1.45855	1.15185e-06	4.36264e-05
hsa-miR-30b-3p	-12.631	1.53123	0.0857701	0.720598	-12.631	1.88686	0.0097982	0.0541593	-12.631	1.39335	0.183188	0.333946	hsa-miR-30b*	3.37329	1.11888	0.256625	0.567573	3.42065	1.15623	0.114072	0.235127	3.41209	1.14938	0.12708	0.26194
hsa-miR-30c-5p	-7.51372	0.627031	0.0525483	0.634757	-7.51372	0.964884	0.881428	0.943421	-7.51372	1.40348	0.158205	0.299163	hsa-miR-30c	6.38938	0.992269	0.914977	0.97964	6.4284	1.01947	0.785824	0.879213	6.48299	1.05878	0.393862	0.560283
hsa-miR-30c-1-3p	-13.2816	1.03121	0.907306	0.977249	-13.2816	1.29688	0.314786	0.50313	-13.2816	0.804437	0.420963	0.599071	hsa-miR-30c-1*	2.67753	0.90408	0.209231	0.511267	2.82471	1.00119	0.984038	0.990586	2.77182	0.965143	0.598811	0.728674
hsa-miR-30d-5p	-4.39943	1.23848	0.368704	0.904641	-4.39943	2.38173	0.00032336	0.00545889	-4.39943	3.30813	9.88406e-07	4.97e-05	hsa-miR-30d	8.15828	1.17232	0.00230635	0.0303836	8.27115	1.26772	4.96849e-05	0.000790675	8.3643	1.35228	5.64536e-06	0.00013158
hsa-miR-30d-3p	-11.052	1.43117	0.112448	0.801004	-11.052	2.03855	0.00164996	0.0180419	-11.052	1.80009	0.00933724	0.0411985	hsa-miR-30d*	2.67873	0.959486	0.653321	0.885528	2.67316	0.955788	0.58077	0.713945	2.70574	0.97762	0.771706	0.875756
hsa-miR-30e-5p	-5.67551	1.18232	0.445822	0.924154	-5.67551	1.58934	0.0356316	0.117913	-5.67551	1.97022	0.00221228	0.0168795	hsa-miR-30e	6.52139	1.1044	0.145649	0.450322	6.53459	1.11455	0.0844526	0.184642	6.60717	1.17206	0.0170972	0.0648291
hsa-miR-30e-3p	-8.08492	1.26416	0.3318	0.904641	-8.08492	2.00204	0.00437055	0.0333089	-8.08492	2.35342	0.000470692	0.00514691	hsa-miR-30e*	3.26148	1.02302	0.699601	0.90767	3.32204	1.06687	0.242577	0.395166	3.37359	1.10568	0.0821169	0.202536
hsa-miR-31-5p	-11.5903	1.83884	0.0542636	0.634757	-11.5903	0.576111	0.0842191	0.203664	-11.5903	0.213034	4.72897e-06	0.000158578	hsa-miR-31	3.16001	1.02207	0.74259	0.925945	3.19818	1.04948	0.430284	0.598056	2.54781	0.668642	4.33224e-05	0.000772157
hsa-miR-32-5p	-9.54954	1.33407	0.229942	0.877037	-9.54954	1.06592	0.790071	0.890434	-9.54954	0.844819	0.48248	0.649884	hsa-miR-32	4.11775	1.11957	0.231613	0.547654	4.17373	1.16387	0.0859226	0.184642	3.83081	0.917647	0.30624	0.475849
hsa-miR-32-3p	-12.5868	0.856968	0.542122	0.955522	-12.5868	0.481169	0.00500613	0.036494	-12.5868	0.330781	4.0897e-05	0.000822847	hsa-miR-32*	2.81719	1.01759	0.861321	0.954165	2.79028	0.998789	0.987316	0.990586	2.72509	0.954659	0.59717	0.728674
hsa-miR-320a	-7.57915	1.567	0.0790452	0.720598	-7.57915	0.978108	0.930752	0.956869	-7.57915	0.570111	0.028427	0.0959222	hsa-miR-320	6.78981	1.13197	0.242197	0.547654	6.6984	1.06248	0.517911	0.667775	6.81045	1.14828	0.147514	0.294058
hsa-miR-324-3p	-10.518	0.930524	0.74709	0.962874	-10.518	1.09114	0.695662	0.830917	-10.518	0.887585	0.59356	0.740318	hsa-miR-324-3p	8.75024	0.908489	0.159097	0.463506	8.68053	0.865636	0.0279515	0.0864214	8.7465	0.906137	0.117146	0.249038
hsa-miR-324-5p	-10.5761	1.10956	0.671065	0.962874	-10.5761	0.990056	0.96744	0.981093	-10.5761	1.10963	0.670924	0.803129	hsa-miR-324-5p	3.67391	1.06533	0.320937	0.604	3.53643	0.968503	0.565431	0.702154	3.56167	0.985594	0.797818	0.888746
hsa-miR-330-3p	-10.8984	1.41405	0.191463	0.866492	-10.8984	0.602934	0.058521	0.165371	-10.8984	0.628137	0.0819882	0.192835	hsa-miR-330-3p	4.00906	1.04033	0.76292	0.931736	3.70352	0.841775	0.160907	0.295484	4.01251	1.04282	0.717812	0.826985
hsa-miR-331-3p	-10.9635	0.878668	0.566553	0.957594	-10.9635	0.9161	0.697476	0.830917	-10.9635	0.958146	0.849603	0.915097	hsa-miR-331-3p	7.30375	1.01104	0.790451	0.947013	7.29887	1.00763	0.854214	0.937402	7.32036	1.02275	0.509247	0.676763
hsa-miR-335-5p	-9.45177	0.871008	0.561308	0.957078	-9.45177	0.554062	0.0137033	0.0682451	-9.45177	0.635507	0.0576675	0.157645	hsa-miR-335	3.83021	0.961439	0.332583	0.612622	3.80411	0.944202	0.124009	0.247203	3.81219	0.949506	0.166591	0.321511
hsa-miR-338-3p	-12.2072	1.17068	0.54799	0.955522	-12.2072	0.867904	0.591819	0.755636	-12.2072	1.25206	0.39126	0.570446	hsa-miR-338-3p	2.73451	1.08314	0.238691	0.547654	2.82473	1.15304	0.0318654	0.094659	2.82351	1.15206	0.0336046	0.10372
hsa-miR-338-5p	-12.2509	1.14701	0.572921	0.960419	-12.2509	2.1129	0.00170617	0.0181845	-12.2509	2.71773	2.80514e-05	0.000671897	hsa-miR-338-5p	3.39187	0.969717	0.656817	0.885528	3.38228	0.963295	0.541747	0.678303	3.39846	0.97416	0.669567	0.792496
hsa-miR-339-3p	-7.16596	1.04986	0.823902	0.962874	-7.16596	1.56238	0.0420925	0.133161	-7.16596	1.48239	0.0726922	0.179236	hsa-miR-339-3p	3.10328	1.23752	0.00958946	0.0785299	2.789	0.995276	0.945159	0.977417	2.90989	1.08227	0.219414	0.371353
hsa-miR-33a-5p	-9.86051	1.27508	0.331089	0.904641	-9.86051	1.04916	0.84767	0.924899	-9.86051	0.65466	0.091712	0.209687	hsa-miR-33a	3.6176	1.03182	0.662765	0.885528	3.54723	0.982698	0.782052	0.879213	3.39264	0.882842	0.0746854	0.193416
hsa-miR-33b-3p	-12.7025	0.944282	0.813993	0.962874	-12.7025	0.620384	0.0554973	0.160432	-12.7025	1.14696	0.570494	0.722043	hsa-miR-33b*	3.90287	0.879124	0.0948477	0.345538	3.92969	0.895615	0.10655	0.222614	3.941	0.902668	0.13366	0.269994
hsa-miR-340-5p	-8.86488	1.45531	0.142043	0.840474	-8.86488	0.658463	0.102536	0.228211	-8.86488	0.656901	0.100647	0.225002	hsa-miR-340	4.48519	0.975032	0.626658	0.876739	4.39054	0.913115	0.069825	0.164008	4.338	0.880465	0.0185301	0.068471
hsa-miR-340-3p	-10.7412	1.25179	0.336133	0.904641	-10.7412	0.838404	0.451525	0.634406	-10.7412	1.17158	0.497715	0.664605	hsa-miR-340*	3.05903	0.807232	0.00486155	0.0487882	3.18285	0.879567	0.036288	0.103729	3.10002	0.830494	0.00571567	0.0303833
hsa-miR-342-3p	-6.64797	0.958812	0.871491	0.962874	-6.64797	1.0873	0.747554	0.868406	-6.64797	1.5111	0.113571	0.241545	hsa-miR-342-3p	8.1429	0.992535	0.88994	0.964761	8.07246	0.945236	0.271601	0.430864	8.08297	0.952149	0.357324	0.518035
hsa-miR-342-5p	-8.20157	0.844592	0.474894	0.926177	-8.20157	0.980641	0.934041	0.956869	-8.20157	0.969947	0.897219	0.945882	hsa-miR-342-5p	5.07523	1.01931	0.703969	0.90767	5.1986	1.1103	0.0377587	0.105934	5.11771	1.04977	0.27928	0.443046
hsa-miR-345-5p	-8.36881	1.27672	0.34474	0.904641	-8.36881	0.841436	0.50412	0.678796	-8.36881	0.627361	0.0724062	0.179236	hsa-miR-345	3.11944	1.17512	0.0122977	0.0908832	3.11837	1.17425	0.00696559	0.0324703	2.92607	1.02771	0.585525	0.721196
hsa-miR-34a-5p	-9.28482	1.12071	0.623766	0.962874	-9.28482	0.939101	0.786828	0.890434	-9.28482	1.02997	0.89887	0.945882	hsa-miR-34a	6.62	1.16727	0.00410894	0.0429314	6.67306	1.211	0.000457962	0.00408125	6.87692	1.3948	4.20133e-06	0.000124907
hsa-miR-361-3p	-10.7079	1.137	0.609718	0.962874	-10.7079	1.81696	0.0178957	0.0750129	-10.7079	1.84789	0.0149731	0.0597736	hsa-miR-361-3p	3.98209	1.11063	0.03329	0.173911	4.26523	1.35146	1.28054e-05	0.000258669	4.31229	1.39626	4.9468e-06	0.000124907
hsa-miR-361-5p	-8.54071	0.888012	0.594809	0.962874	-8.54071	0.783249	0.274422	0.460114	-8.54071	0.926364	0.731904	0.850226	hsa-miR-361-5p	5.02959	1.05899	0.268096	0.570866	5.04483	1.07024	0.154822	0.287734	5.01081	1.0453	0.322714	0.489141
hsa-miR-362-3p	-14.5679	0.830704	0.599678	0.962874	-14.5679	0.61181	0.181135	0.34676	-14.5679	0.65789	0.254628	0.419405	hsa-miR-362-3p	3.56743	0.997953	0.963471	0.993469	3.43701	0.911692	0.0261249	0.0816067	3.37228	0.87169	0.0031283	0.0182284
hsa-miR-362-5p	-11.7078	0.951137	0.838415	0.962874	-11.7078	0.624635	0.0579425	0.165371	-11.7078	0.470228	0.00273915	0.019065	hsa-miR-362-5p	3.90336	0.930384	0.150181	0.450544	3.82965	0.884042	0.0135016	0.0505058	3.8599	0.902776	0.0334904	0.10372
hsa-miR-365a-3p	-10.0631	1.00207	0.994082	0.996062	-10.0631	0.570131	0.045352	0.139885	-10.0631	0.870441	0.618634	0.758044	hsa-miR-365	9.1412	1.10408	0.148722	0.450544	9.32208	1.25155	0.00265968	0.0164466	9.49676	1.41264	0.000105266	0.00138676
hsa-miR-374a-5p	-9.82921	0.866404	0.529838	0.955522	-9.82921	0.717499	0.146764	0.295289	-9.82921	0.856747	0.498249	0.664605	hsa-miR-374a	6.8689	0.995538	0.9501	0.993469	6.78745	0.940893	0.373094	0.538321	6.8493	0.982108	0.807024	0.889193
hsa-miR-374b-5p	-8.518	0.861889	0.517265	0.955522	-8.518	0.598822	0.0262476	0.0958718	-8.518	0.805203	0.345468	0.520271	hsa-miR-374b	6.50791	0.977833	0.687421	0.897796	6.53636	0.997309	0.941783	0.977417	6.69617	1.11413	0.0494379	0.137428
hsa-miR-374b-3p	-11.6716	1.29704	0.291457	0.904641	-11.6716	1.19889	0.461909	0.643372	-11.6716	1.38536	0.186021	0.337793	hsa-miR-374b*	2.58949	0.935758	0.479006	0.752014	2.77223	1.06212	0.464462	0.628267	2.71441	1.02039	0.812175	0.890234
hsa-miR-375	-6.36023	0.865169	0.500327	0.949676	-6.36023	1.38228	0.13258	0.273099	-6.36023	1.49625	0.0615033	0.164554	hsa-miR-375	5.15122	1.12047	0.0672626	0.264683	5.20491	1.16296	0.0125823	0.0482589	5.21574	1.17173	0.00909099	0.0417359
hsa-miR-378a-3p	-6.44816	1.21753	0.421863	0.924154	-6.44816	1.95604	0.00662373	0.0424803	-6.44816	1.61717	0.0507178	0.14413	hsa-miR-378	4.33469	0.98828	0.860325	0.954165	4.04298	0.807361	0.00426821	0.0235707	4.10142	0.840739	0.0142669	0.058417
hsa-miR-421	-10.8572	1.18847	0.46667	0.924154	-10.8572	0.786119	0.312204	0.502684	-10.8572	0.98368	0.944765	0.973804	hsa-miR-421	3.33812	0.940966	0.319706	0.604	3.20972	0.860834	0.0158993	0.0571358	3.32064	0.929628	0.188694	0.348624
hsa-miR-423-3p	-7.21983	0.934421	0.756723	0.962874	-7.21983	0.799803	0.308063	0.499857	-7.21983	0.926212	0.726282	0.84761	hsa-miR-423-3p	3.27581	0.906957	0.161051	0.463506	3.09293	0.798977	0.00296202	0.0172594	3.21308	0.868364	0.0338887	0.10372
hsa-miR-423-5p	-6.78914	1.3748	0.171005	0.866492	-6.78914	0.84564	0.470209	0.649767	-6.78914	0.56767	0.0153527	0.0608063	hsa-miR-423-5p	5.11998	0.997526	0.955656	0.993469	5.16445	1.02875	0.521394	0.668435	5.20009	1.05448	0.220606	0.371353
hsa-miR-424-5p	-8.55627	1.6572	0.0826296	0.720598	-8.55627	0.62116	0.101796	0.227811	-8.55627	0.429596	0.00405142	0.0246172	hsa-miR-424	7.42905	1.06139	0.291858	0.590067	7.16345	0.882921	0.0248289	0.0783663	6.60417	0.599187	7.80464e-07	3.94134e-05
hsa-miR-424-3p	-10.9186	0.63864	0.0893261	0.720598	-10.9186	0.314182	1.93496e-05	0.000695205	-10.9186	0.231694	1.15138e-07	9.65e-06	hsa-miR-424*	3.40762	0.836934	0.0265772	0.154863	3.37359	0.817423	0.00804637	0.0353341	3.55092	0.924331	0.228758	0.378763
hsa-miR-425-5p	-6.63066	1.13839	0.555656	0.955522	-6.63066	0.956231	0.838711	0.91911	-6.63066	1.29409	0.241616	0.410584	hsa-miR-425	7.49314	0.990287	0.794946	0.947013	7.54906	1.02943	0.426368	0.595344	7.70329	1.14557	0.00222692	0.0143565
hsa-miR-425-3p	-9.59902	1.08259	0.719307	0.962874	-9.59902	1.66071	0.0220815	0.0867733	-9.59902	1.68764	0.0182553	0.0700946	hsa-miR-425*	3.86228	0.864311	0.054847	0.24085	3.98924	0.94382	0.354664	0.51665	3.90069	0.887631	0.0760538	0.19365
hsa-miR-429	-7.37992	1.22932	0.380665	0.904641	-7.37992	0.781658	0.2958	0.489433	-7.37992	0.867271	0.545254	0.701652	hsa-miR-429	6.48791	0.999587	0.988762	0.995757	6.47117	0.988059	0.769065	0.875342	6.55126	1.04446	0.321394	0.489141
hsa-miR-450a-5p	-10.4358	1.1169	0.659176	0.962874	-10.4358	0.90012	0.674873	0.82519	-10.4358	0.675483	0.119682	0.24822	hsa-miR-450a	3.62406	0.951935	0.476768	0.752014	3.55513	0.907524	0.132092	0.261594	3.41106	0.821273	0.00772588	0.0365772
hsa-miR-454-3p	-9.26339	0.714481	0.18928	0.866492	-9.26339	0.496369	0.00667185	0.0424803	-9.26339	0.625989	0.0680649	0.177058	hsa-miR-454	6.01884	0.88448	0.00640481	0.0570781	5.90594	0.817905	8.72476e-05	0.00114939	6.03494	0.894407	0.00631444	0.0311235
hsa-miR-455-3p	-12.5821	1.29044	0.302994	0.904641	-12.5821	0.464291	0.00315326	0.0265365	-12.5821	0.449175	0.00224306	0.0168795	hsa-miR-455-3p	3.32982	1.00267	0.973169	0.993469	3.42063	1.06782	0.384378	0.551974	3.12668	0.870984	0.0822177	0.202536
hsa-miR-483-5p	-13.344	0.971285	0.913261	0.977384	-13.344	0.974395	0.92229	0.956869	-13.344	0.754795	0.304162	0.474348	hsa-miR-483-5p	5.42455	1.05379	0.768759	0.931736	5.08119	0.830602	0.253744	0.409797	5.26388	0.94273	0.714729	0.826985
hsa-miR-484	-10.1972	1.13771	0.577044	0.961103	-10.1972	1.03451	0.883402	0.943421	-10.1972	0.990794	0.968126	0.984987	hsa-miR-484	4.58789	0.975679	0.725299	0.919521	4.76004	1.09934	0.155737	0.287734	4.53196	0.938577	0.330947	0.493975
hsa-miR-486-5p	-12.9418	1.10645	0.729776	0.962874	-12.9418	2.0412	0.0121243	0.0628714	-12.9418	1.90593	0.024001	0.0857833	hsa-miR-486-5p	2.83754	0.941759	0.66926	0.885528	3.15997	1.1776	0.202549	0.342862	3.00322	1.05636	0.662199	0.786848
hsa-miR-489-3p	-9.52438	1.42892	0.115156	0.801004	-9.52438	1.04987	0.8296	0.916071	-9.52438	1.11622	0.626887	0.76535	hsa-miR-489	4.03396	1.09969	0.0540732	0.24085	3.98211	1.06087	0.163547	0.298523	3.81817	0.946916	0.19536	0.352729
hsa-miR-494-3p	-14.2379	1.18659	0.567322	0.957594	-14.2379	0.484489	0.0295042	0.10306	-14.2379	0.174463	1.54403e-05	0.000388323	hsa-miR-494	8.47756	1.09521	0.445046	0.724994	8.35206	1.00396	0.977735	0.990586	8.4279	1.05815	0.581896	0.721196
hsa-miR-497-5p	-12.0358	1.27606	0.370547	0.904641	-12.0358	0.925996	0.77871	0.890434	-12.0358	1.1298	0.654742	0.791672	hsa-miR-497	3.36941	1.10951	0.0609523	0.256508	3.31488	1.06836	0.166004	0.301193	3.29449	1.05337	0.26641	0.429373
hsa-miR-500a-5p	-11.8196	0.846452	0.463199	0.924154	-11.8196	0.964077	0.871396	0.941995	-11.8196	1.16483	0.498617	0.664605	hsa-miR-500	6.92896	1.37414	0.471083	0.750305	6.08573	0.765937	0.495833	0.653206	6.43238	0.973971	0.948188	0.957624
hsa-miR-500a-3p	-10.5234	0.821635	0.367596	0.904641	-10.5234	0.969529	0.886862	0.945109	-10.5234	0.933229	0.750928	0.863562	hsa-miR-500*	3.815	0.918729	0.162317	0.463506	3.8587	0.946984	0.300184	0.464059	3.92225	0.989631	0.847563	0.91523
hsa-miR-501-3p	-10.9169	0.762373	0.222483	0.877037	-10.9169	0.874629	0.545613	0.720323	-10.9169	0.954828	0.834739	0.906855	hsa-miR-501-3p	2.75341	0.846693	0.1005	0.358254	2.75217	0.845968	0.0696302	0.164008	2.86263	0.91328	0.291022	0.456889
hsa-miR-501-5p	-11.3821	0.814634	0.36362	0.904641	-11.3821	0.880137	0.570472	0.733881	-11.3821	0.91356	0.688069	0.814349	hsa-miR-501-5p	6.32451	1.23624	0.673795	0.887652	5.51863	0.707146	0.442902	0.609996	5.98684	0.978263	0.962481	0.965668
hsa-miR-502-3p	-11.6601	0.721126	0.152701	0.847433	-11.6601	0.976849	0.917568	0.956869	-11.6601	1.02049	0.928635	0.963457	hsa-miR-502-3p	3.32865	1.0545	0.272003	0.570866	3.12998	0.918839	0.0659445	0.161804	3.25147	0.999571	0.988682	0.988682
hsa-miR-502-5p	-13.5314	1.07395	0.793354	0.962874	-13.5314	0.694538	0.19706	0.368481	-13.5314	1.06916	0.806451	0.897371	hsa-miR-502-5p	3.44342	0.913315	0.168277	0.464635	3.39876	0.885474	0.0490868	0.129333	3.4656	0.927467	0.197374	0.352729
hsa-miR-503-5p	-9.23769	1.49208	0.0872843	0.720598	-9.23769	0.990319	0.966754	0.981093	-9.23769	0.464104	0.00117885	0.0102235	hsa-miR-503	3.98205	0.789452	0.00084114	0.0188537	3.53181	0.577815	2.36891e-07	1.79445e-05	2.90966	0.375409	8.51216e-10	1.28959e-07
hsa-miR-505-3p	-10.7516	0.934956	0.756132	0.962874	-10.7516	0.720771	0.132034	0.273099	-10.7516	0.712869	0.119915	0.24822	hsa-miR-505	4.23496	0.918669	0.0957927	0.345538	4.23622	0.919477	0.0676818	0.162759	4.1906	0.890855	0.0192308	0.070204
hsa-miR-505-5p	-12.6969	0.727	0.189099	0.866492	-12.6969	0.357247	5.20348e-05	0.00166941	-12.6969	0.353324	4.85786e-05	0.000890148	hsa-miR-505*	3.29503	0.908011	0.235711	0.547654	3.32736	0.928588	0.301754	0.46412	3.4725	1.02687	0.703539	0.823059
hsa-miR-512-3p	-13.0128	1.95305	0.0141385	0.408812	-13.0128	1.34541	0.282928	0.471234	-13.0128	1.59875	0.0883846	0.203114	hsa-miR-512-3p	2.9088	1.01834	0.84748	0.951061	2.79497	0.941086	0.47807	0.638129	2.78231	0.932864	0.41292	0.57944
hsa-miR-522-3p	-11.7016	1.03015	0.903504	0.975242	-11.7016	0.63938	0.0712102	0.184473	-11.7016	0.789952	0.33896	0.512394	hsa-miR-522	2.81302	0.996403	0.945757	0.993469	2.90059	1.05876	0.179831	0.320523	2.78243	0.975504	0.535706	0.684888
hsa-miR-532-3p	-12.5567	0.839432	0.479851	0.927542	-12.5567	0.665505	0.103743	0.22988	-12.5567	0.805448	0.383941	0.563038	hsa-miR-532-3p	2.97608	0.97677	0.740487	0.925945	2.88203	0.915121	0.171674	0.307793	2.94744	0.957567	0.481807	0.648834
hsa-miR-532-5p	-9.18634	0.95027	0.843576	0.962874	-9.18634	1.77787	0.026862	0.0972057	-9.18634	1.78836	0.0253724	0.0890483	hsa-miR-532-5p	3.36243	1.023	0.750761	0.928493	3.36896	1.02765	0.675298	0.803331	3.34238	1.00889	0.891127	0.942602
hsa-miR-542-3p	-8.13079	1.14249	0.532573	0.955522	-8.13079	1.40268	0.113545	0.24512	-8.13079	1.06282	0.77526	0.884027	hsa-miR-542-3p	4.11614	1.03121	0.572234	0.840562	3.95626	0.923034	0.117959	0.236719	3.69644	0.770913	0.000249557	0.00260744
hsa-miR-542-5p	-10.3786	1.02228	0.919757	0.980995	-10.3786	1.00342	0.987534	0.996183	-10.3786	0.843012	0.435778	0.612281	hsa-miR-542-5p	4.5931	1.02589	0.821248	0.948948	4.26266	0.815884	0.0634348	0.157547	4.30511	0.840249	0.106749	0.242732
hsa-miR-550a-5p	-12.7018	1.194	0.512376	0.955522	-12.7018	0.866897	0.601426	0.760094	-12.7018	0.845595	0.541854	0.700649	hsa-miR-550	3.37295	0.92875	0.273187	0.570866	3.30488	0.885951	0.0586517	0.148096	3.19818	0.822787	0.00634496	0.0311235
hsa-miR-550a-3p	-13.2682	1.13994	0.633889	0.962874	-13.2682	1.17431	0.55668	0.72354	-13.2682	1.65716	0.0603475	0.162635	hsa-miR-550*	3.39415	0.911447	0.18591	0.491247	3.51452	0.990751	0.872828	0.940748	3.44401	0.943492	0.341783	0.505172
hsa-miR-574-3p	-12.2862	1.43595	0.207951	0.866492	-12.2862	0.555632	0.0463069	0.140983	-12.2862	0.638118	0.125926	0.255407	hsa-miR-574-3p	3.90017	1.07731	0.240988	0.547654	4.09669	1.23452	0.00281127	0.0167023	4.37856	1.5009	1.7858e-05	0.000386498
hsa-miR-584-5p	-11.4726	1.08945	0.726976	0.962874	-11.4726	1.44719	0.13074	0.271744	-11.4726	1.46163	0.121117	0.248661	hsa-miR-584	2.92582	0.987155	0.894255	0.964761	2.92536	0.986835	0.876966	0.940748	2.90687	0.974269	0.74695	0.850849
hsa-miR-590-5p	-10.9124	0.916434	0.699315	0.962874	-10.9124	0.668009	0.0758169	0.191638	-10.9124	0.794218	0.309107	0.478402	hsa-miR-590-5p	4.98555	1.06733	0.248191	0.556849	4.91804	1.01854	0.718149	0.827373	4.98285	1.06534	0.204674	0.362459
hsa-miR-625-3p	-11.8569	1.10361	0.691103	0.962874	-11.8569	1.07248	0.777815	0.890434	-11.8569	1.35307	0.221886	0.384858	hsa-miR-625*	2.95101	0.924037	0.409385	0.685325	2.92681	0.908663	0.269585	0.429917	2.91133	0.898966	0.218872	0.371353
hsa-miR-629-5p	-9.01979	0.898261	0.654761	0.962874	-9.01979	1.55486	0.0666033	0.178199	-9.01979	1.53417	0.0752584	0.182657	hsa-miR-629	3.4848	1.05434	0.42164	0.697278	3.44306	1.02428	0.684687	0.807238	3.51598	1.07738	0.216912	0.371353
hsa-miR-629-3p	-13.8507	0.767989	0.374345	0.904641	-13.8507	0.690075	0.214506	0.390929	-13.8507	0.995617	0.987885	0.988485	hsa-miR-629*	5.38526	1.91564	6.51812e-06	0.000987495	5.88456	2.7078	4.31508e-08	4.35823e-06	5.10949	1.58234	4.9374e-05	0.000831129
hsa-miR-636	-14.1367	0.661488	0.207788	0.866492	-14.1367	0.873406	0.666127	0.817652	-14.1367	0.835195	0.572044	0.722043	hsa-miR-636	4.78535	1.60391	8.63866e-05	0.00654379	5.13241	2.04012	8.67318e-07	4.37995e-05	4.70882	1.52105	8.98931e-05	0.00123807
hsa-miR-652-3p	-8.12524	1.05061	0.824349	0.962874	-8.12524	1.22302	0.365712	0.554696	-8.12524	1.25322	0.310637	0.479296	hsa-miR-652	3.76925	1.0925	0.0588853	0.254889	3.62106	0.985854	0.703999	0.821191	3.70172	1.04254	0.285038	0.449826
hsa-miR-660-5p	-11.294	0.915228	0.698829	0.962874	-11.294	0.761547	0.235574	0.413795	-11.294	0.657096	0.0690174	0.177058	hsa-miR-660	4.39589	1.02899	0.451853	0.732147	4.27505	0.946315	0.117969	0.236719	4.26031	0.936694	0.0753759	0.19355
hsa-miR-671-5p	-7.78168	1.09241	0.699856	0.962874	-7.78168	0.858547	0.50606	0.678796	-7.78168	0.633456	0.0473969	0.137982	hsa-miR-671-5p	4.07378	1.09628	0.241772	0.547654	4.03537	1.06748	0.349892	0.514647	3.94974	1.00597	0.923792	0.942602
hsa-miR-7-5p	-7.34224	1.80622	0.030251	0.543437	-7.34224	0.596015	0.0575277	0.165351	-7.34224	0.468701	0.00571083	0.0290156	hsa-miR-7	5.28082	1.02903	0.630483	0.876739	4.96822	0.828563	0.00416545	0.0235707	4.98437	0.837891	0.0063685	0.0311235
hsa-miR-7-1-3p	-13.0704	1.16544	0.582365	0.962874	-13.0704	0.441618	0.00574703	0.0395994	-13.0704	0.604697	0.0824292	0.192846	hsa-miR-7-1*	3.22604	0.894809	0.0623495	0.258793	3.13594	0.840637	0.00427851	0.0235707	3.28414	0.931577	0.163998	0.318535
hsa-miR-744-5p	-7.39712	0.84869	0.450873	0.924154	-7.39712	0.675467	0.0721317	0.184473	-7.39712	0.728062	0.145337	0.28268	hsa-miR-744	4.31763	0.811261	0.0264837	0.154863	3.9881	0.645594	0.000114009	0.00137945	4.0722	0.684351	0.00035887	0.00310678
hsa-miR-760	-10.8976	0.639226	0.09346	0.720598	-10.8976	0.82312	0.463023	0.643372	-10.8976	0.684118	0.154085	0.292471	hsa-miR-760	3.8933	1.02493	0.865992	0.954165	3.56303	0.815224	0.139412	0.267353	3.9261	1.0485	0.715216	0.826985
hsa-miR-765	-13.4905	1.1902	0.537535	0.955522	-13.4905	1.40809	0.217075	0.392766	-13.4905	1.02195	0.939605	0.970475	hsa-miR-765	3.43501	1.06587	0.249939	0.556849	3.40258	1.04217	0.400235	0.566687	3.37692	1.0238	0.626257	0.756
hsa-miR-769-5p	-8.87136	1.22243	0.362588	0.904641	-8.87136	1.65107	0.0235492	0.0904216	-8.87136	1.49433	0.0692398	0.177058	hsa-miR-769-5p	3.44695	1.01811	0.755759	0.930874	3.39944	0.985127	0.771341	0.875342	3.4678	1.03293	0.537273	0.684888
hsa-miR-877-5p	-8.18425	1.0186	0.932138	0.983455	-8.18425	0.667314	0.06262	0.171184	-8.18425	0.622325	0.0292462	0.0972312	hsa-miR-877	3.1549	1.13638	0.168679	0.464635	3.32151	1.27549	0.010235	0.0417102	3.41619	1.362	0.0024579	0.0155155
hsa-miR-9-3p	-12.4093	1.24311	0.418884	0.924154	-12.4093	0.624522	0.0879874	0.207363	-12.4093	1.0236	0.931351	0.963929	hsa-miR-9*	3.38462	0.987932	0.813128	0.948948	3.53794	1.09871	0.0566038	0.144126	3.57548	1.12767	0.0199286	0.0718853
hsa-miR-92a-3p	-6.88867	1.10575	0.651835	0.962874	-6.88867	1.34338	0.18586	0.352784	-6.88867	1.52146	0.0604626	0.162635	hsa-miR-92a	7.33409	1.0477	0.319282	0.604	7.46121	1.1442	0.00688928	0.0324703	7.40527	1.10069	0.0332659	0.10372
hsa-miR-92a-1-5p	-11.8259	0.592432	0.082152	0.720598	-11.8259	0.223723	2.16026e-06	0.000120735	-11.8259	0.19976	4.50482e-07	2.52e-05	hsa-miR-92a-1*	2.57448	0.753946	0.00189264	0.0283409	2.59626	0.765415	0.00127436	0.00990078	2.67699	0.809469	0.00552129	0.0298741
hsa-miR-92b-3p	-8.0561	1.19017	0.450585	0.924154	-8.0561	1.94797	0.00415368	0.0326003	-8.0561	2.22442	0.000617955	0.0063435	hsa-miR-92b	2.87759	0.999159	0.996277	0.996277	2.83106	0.967448	0.667171	0.799023	2.66014	0.859364	0.0661417	0.172767
hsa-miR-93-5p	-4.86509	1.00874	0.970228	0.990756	-4.86509	1.41501	0.137386	0.279777	-4.86509	1.59204	0.047014	0.137982	hsa-miR-93	6.87578	1.10216	0.106543	0.366847	6.59975	0.91023	0.0805777	0.183572	6.60724	0.914967	0.103806	0.238283
hsa-miR-93-3p	-11.7254	0.632228	0.0886551	0.720598	-11.7254	0.416289	0.00136243	0.016836	-11.7254	0.367527	0.000286261	0.00359973	hsa-miR-93*	2.70437	1.1102	0.318266	0.604	2.73249	1.13205	0.192984	0.334138	2.57012	1.01155	0.910235	0.942602
hsa-miR-939-5p	-13.2873	0.790791	0.399158	0.912621	-13.2873	0.857649	0.576875	0.740225	-13.2873	0.609315	0.0820412	0.192835	hsa-miR-939	6.09647	1.05878	0.50176	0.779659	5.98987	0.983367	0.81333	0.902707	5.99828	0.989118	0.897238	0.942602
hsa-miR-940	-12.701	1.1093	0.701761	0.962874	-12.701	0.319623	8.19301e-05	0.002314	-12.701	0.267743	8.63558e-06	0.000255512	hsa-miR-940	7.21057	1.59932	0.00180359	0.0283409	7.76014	2.34084	6.61147e-06	0.000155307	7.21262	1.60159	0.000793395	0.00586338
hsa-miR-95-3p	-9.54223	2.2646	0.00465224	0.234008	-9.54223	1.17584	0.570331	0.733881	-9.54223	1.07446	0.801301	0.897371	hsa-miR-95	3.63676	1.26591	0.000452809	0.0137201	3.53949	1.18337	0.00224784	0.0151354	3.3735	1.05476	0.226526	0.377129
hsa-miR-96-5p	-6.5347	1.10571	0.645267	0.962874	-6.5347	1.02301	0.916974	0.956869	-6.5347	0.953982	0.8291	0.902678	hsa-miR-96	8.24122	1.00855	0.891411	0.964761	8.32916	1.07194	0.219685	0.365739	8.04478	0.880164	0.0363145	0.108943
hsa-miR-98-5p	-7.44621	1.29262	0.286567	0.904641	-7.44621	0.822242	0.416221	0.60334	-7.44621	1.16958	0.515088	0.677144	hsa-miR-98	6.47787	0.988688	0.799272	0.947013	6.38499	0.927042	0.083182	0.184642	6.37937	0.92344	0.0778448	0.194934
hsa-miR-99a-5p	-8.61703	1.08345	0.720014	0.962874	-8.61703	1.17715	0.465917	0.645609	-8.61703	1.02197	0.922581	0.962016	hsa-miR-99a	5.46735	1.06664	0.259288	0.569306	5.46811	1.0672	0.211735	0.354915	5.31067	0.956875	0.392975	0.560283
hsa-miR-99b-5p	-4.59699	1.14666	0.619809	0.962874	-4.59699	2.39085	0.00185063	0.0186173	-4.59699	3.08597	6.72493e-05	0.00109726	hsa-miR-99b	5.93135	0.994007	0.894712	0.964761	5.91687	0.984082	0.689363	0.809601	6.00667	1.04728	0.275709	0.439684
hsa-miR-99b-3p	-8.83179	0.871534	0.580538	0.962874	-8.83179	1.50983	0.0985699	0.222335	-8.83179	1.39584	0.180737	0.331791	hsa-miR-99b*	3.0763	1.09163	0.324056	0.606105	3.19797	1.18769	0.0462856	0.123545	3.1119	1.1189	0.169943	0.323853

## Sheet: Camps_TableS4
Supplementary table 4
	microRNA-SEQ DATA						AGILENT MICROARRAY DATA
miRNA-seq ID	FC H16h	adj.p-val H16h	FC H32h	adj.p-val H32h	FC H48h	adj.p-val H48h	Agilent ID	FC H16h	adj.p-val H16h	FC H32h	adj.p-val H32h	FC H48h	adj.p-val H48h
hsa-miR-1278	0.756374	0.912621	1.08611	0.890434	1.48554	0.347564	NA	NA	NA	NA	NA	NA	NA
hsa-miR-134-5p	1.13278	0.962874	1.52352	0.322807	0.571585	0.230316	hsa-miR-134	1.63606	0.000998777	2.24289	4.35823e-06	1.83917	3.75023e-05
hsa-miR-144-5p	1.14756	0.962874	0.980442	0.962626	1.01081	0.984987	NA	NA	NA	NA	NA	NA	NA
hsa-miR-146b-5p	1.251	0.904641	1.80945	0.0727392	2.42848	0.00397865	hsa-miR-146b-5p	0.924769	0.570866	0.989519	0.937402	1.04779	0.617221
hsa-miR-151b	1.22225	0.912621	1.21492	0.597134	1.0328	0.942475	NA	NA	NA	NA	NA	NA	NA
hsa-miR-181c-5p	1.1269	0.962874	1.22862	0.540576	1.19742	0.590033	hsa-miR-181c	0.985087	0.948948	1.01047	0.937402	1.03514	0.684888
hsa-miR-181c-3p	1.11525	0.962874	1.88945	0.0385093	1.84277	0.0359905	NA	NA	NA	NA	NA	NA	NA
hsa-miR-181d-5p	0.863453	0.955522	1.26295	0.510843	1.22112	0.575005	hsa-miR-181d	0.937717	0.494271	0.910608	0.123545	1.032	0.625014
hsa-miR-210-3p	3.2423	0.00011255	4.03383	5.45558e-07	3.95955	8.41365e-07	hsa-miR-210	3.2972	2.87638e-08	5.06826	4.39531e-10	6.15459	1.39707e-10
hsa-miR-23a-3p	0.999231	0.997401	0.65778	0.192534	0.863961	0.696182	hsa-miR-23a	1.04129	0.869475	1.18909	0.0906023	1.25696	0.0329569
hsa-miR-23a-5p	0.346405	0.225229	0.304659	0.016836	0.1575	0.000197073	hsa-miR-23a*	0.969725	0.885528	0.849757	0.070384	0.919541	0.352729
hsa-miR-24-3p	1.22155	0.904641	0.898864	0.798901	1.07968	0.857475	hsa-miR-24	1.0373	0.644818	1.01579	0.803331	1.14043	0.0169452
hsa-miR-24-2-5p	0.860951	0.95191	0.62601	0.121611	0.77286	0.418974	NA	NA	NA	NA	NA	NA	NA
hsa-miR-26b-5p	1.25253	0.904641	0.783387	0.490346	0.854619	0.66641	hsa-miR-26b	1.08269	0.345538	1.14738	0.0265357	1.05263	0.352729
hsa-miR-26b-5p	0.996683	0.993488	1.50338	0.186563	1.68094	0.0836546	NA	NA	NA	NA	NA	NA	NA
hsa-miR-27a-3p	1.28574	0.904641	1.35971	0.304434	1.37995	0.268738	hsa-miR-27a	1.19897	0.0487882	1.34946	0.00085543	1.34219	0.00092607
hsa-miR-27a-5p	1.22473	0.904641	1.89783	0.0265365	2.19125	0.00375871	NA	NA	NA	NA	NA	NA	NA
hsa-miR-301a-3p	0.653102	0.801004	0.474945	0.0457395	0.583636	0.146079	hsa-miR-301a	0.881362	0.111417	0.870584	0.0265357	1.04267	0.462547
hsa-miR-30b-5p	0.931924	0.962874	0.502132	0.0385093	0.603469	0.125579	hsa-miR-30b	1.20576	0.0200764	1.39432	0.000119221	1.45855	4.36264e-05
hsa-miR-30b-3p	1.53123	0.720598	1.88686	0.0541593	1.39335	0.333946	hsa-miR-30b*	1.11888	0.567573	1.15623	0.235127	1.14938	0.26194
hsa-miR-30d-5p	1.23848	0.904641	2.38173	0.00545888	3.30813	4.97168e-05	hsa-miR-30d	1.17232	0.0303836	1.26772	0.000790675	1.35228	0.00013158
hsa-miR-30d-3p	1.43117	0.801004	2.03855	0.0180419	1.80009	0.0411985	hsa-miR-30d*	0.959486	0.885528	0.955788	0.713945	0.97762	0.875756
hsa-miR-3164	1.3869	0.904641	2.09722	0.0727392	2.7042	0.00970491	NA	NA	NA	NA	NA	NA	NA
hsa-miR-328-3p	1.22183	0.924154	1.57276	0.207363	1.48643	0.268738	NA	NA	NA	NA	NA	NA	NA
hsa-miR-342-3p	0.958812	0.962874	1.0873	0.868406	1.5111	0.241545	hsa-miR-342-3p	0.992535	0.964761	0.945236	0.430864	0.952149	0.518035
hsa-miR-342-5p	0.844592	0.926177	0.980641	0.956869	0.969947	0.945882	hsa-miR-342-5p	1.01931	0.90767	1.1103	0.105934	1.04977	0.443046
hsa-miR-3679-5p	0.927716	0.962874	1.25783	0.556936	1.49712	0.241545	NA	NA	NA	NA	NA	NA	NA
hsa-miR-454-3p	0.714481	0.866492	0.496369	0.0424803	0.625989	0.177058	hsa-miR-454	0.88448	0.0570781	0.817905	0.00114939	0.894407	0.0311235
has-miR-454-5p	0.815637	0.904641	0.804702	0.543753	1.24063	0.527889	NA	NA	NA	NA	NA	NA	NA
hsa-miR-4662a-5p	0.825229	0.955522	0.95925	0.948762	1.05451	0.924128	NA	NA	NA	NA	NA	NA	NA
hsa-miR-494-3p	1.18659	0.957594	0.484489	0.10306	0.174463	0.000388323	hsa-miR-494	1.09521	0.724994	1.00396	0.990586	1.05815	0.721196
hsa-miR-636	0.661488	0.866492	0.873406	0.817652	0.835195	0.722043	hsa-miR-636	1.60391	0.00654379	2.04012	4.37995e-05	1.52105	0.00123807

## Sheet: Camps_TableS5
Supplementary table 5
													Host gene
miRNAs	FC H16h	adj.p-val H16h	FC H32h	adj.p-val H32h	FC H48h	adj.p-val H48h	miRNA precursor	Accession	chr	start	end	strand	Gene_name	Gene_ID	chr	start	end	strand	FC H16h	adj.p-val H16h	FC H32h	adj.p-val H32h	FC H48h	adj.p-val H48h
hsa-let-7c-5p	0.930749	0.962874	0.872328	0.720366	0.939794	0.888926	hsa-let-7c	MI0000064	chr21	17912148	17912231	+	LINC00478	NR_027790	chr21	17442841	17982094	+	0.771573	7.33002e-05	0.872571	0.00800669	0.81322	0.000309311
hsa-let-7f-2-3p	1.00727	0.990756	1.07893	0.890434	0.719189	0.419405	hsa-let-7f-2	MI0000068	chrX	53584153	53584235	-	HUWE1	NM_031407	chrX	53559056	53713697	-	1.19727	0.0531407	1.10701	0.246499	1.10867	0.228585
hsa-miR-101-3p	1.02308	0.980995	1.78538	0.0729721	1.5132	0.199849	hsa-mir-101-2	MI0000739	chr9	4850297	4850375	+	RCL1	NM_005772	chr9	4792833	4861064	+	0.549437	3.48345e-07	0.424084	6.0293e-09	0.313484	1.76494e-10
hsa-miR-103a-3p	1.3897	0.866492	0.878339	0.755636	0.804145	0.548664	hsa-mir-103a-1	MI0000109	chr5	167987901	167987978	-	PANK3	NM_024594	chr5	167982627	168006614	-	1.2493	0.000451358	1.16132	0.0065193	1.03643	0.469678
hsa-miR-106b-5p	0.880271	0.955522	0.921889	0.834521	0.89485	0.745919	hsa-mir-106b	MI0000734	chr7	99691616	99691697	-	MCM7	NM_005916	chr7	99690403	99699427	-	1.03614	0.456093	0.825507	0.0003957	0.6474	9.5405e-08
hsa-miR-106b-3p	1.10172	0.962874	2.14833	0.0293359	1.9416	0.0480034	hsa-mir-106b	MI0000734	chr7	99691616	99691697	-	MCM7	NM_005916	chr7	99690403	99699427	-	1.03614	0.456093	0.825507	0.0003957	0.6474	9.5405e-08
hsa-miR-107	1.37192	0.877037	0.766137	0.501135	0.685706	0.290194	hsa-mir-107	MI0000114	chr10	91352504	91352584	-	PANK1	NM_148978	chr10	91339253	91403648	-	1.03161	0.578526	1.00961	0.862906	0.940176	0.218847
hsa-miR-1226-3p	0.743049	0.904641	0.688705	0.441263	0.809412	0.677144	hsa-mir-1226	MI0006313	chr3	47891045	47891119	+	DHX30	NM_014966	chr3	47844398	47891686	+	0.648583	2.3677e-07	0.64172	1.14747e-07	0.61631	2.83085e-08
hsa-miR-1252-5p	0.90817	0.962874	1.29995	0.551329	0.995714	0.988485	hsa-mir-1252	MI0006434	chr12	79813037	79813101	+	SYT1	NM_001135805	chr12	79257772	79845788	+	1.02266	0.770937	1.13475	0.0663652	1.34725	0.000286306
hsa-miR-1255a	1.65833	0.618581	0.95644	0.939176	1.28198	0.502677	hsa-mir-1255a	MI0006389	chr4	102251459	102251571	-	PPP3CA	NM_001130691	chr4	101944586	102268628	-	0.953594	0.430957	0.880029	0.0283841	0.892187	0.0433516
hsa-miR-125b-5p	0.924933	0.962874	1.22675	0.540576	1.05396	0.897371	hsa-mir-125b-2	MI0000470	chr21	17962557	17962645	+	LINC00478	NR_027790	chr21	17442841	17982094	+	0.771573	7.33002e-05	0.872571	0.00800669	0.81322	0.000309311
hsa-miR-125b-2-3p	1.06958	0.962874	1.69446	0.073527	1.26043	0.464506	hsa-mir-125b-2	MI0000470	chr21	17962557	17962645	+	LINC00478	NR_027790	chr21	17442841	17982094	+	0.771573	7.33002e-05	0.872571	0.00800669	0.81322	0.000309311
hsa-miR-126-3p	1.1697	0.926177	1.02325	0.956869	1.1167	0.756334	hsa-mir-126	MI0000471	chr9	139565054	139565138	+	EGFL7	NR_046367	chr9	139553307	139567130	+	0.921025	0.120587	0.880077	0.0167328	0.95617	0.36529
hsa-miR-126-5p	0.875544	0.955522	0.642847	0.155144	0.735064	0.325996	hsa-mir-126	MI0000471	chr9	139565054	139565138	+	EGFL7	NR_046367	chr9	139553307	139567130	+	0.921025	0.120587	0.880077	0.0167328	0.95617	0.36529
hsa-miR-1266-5p	1.32746	0.904641	1.8041	0.0784104	1.765	0.0857833	hsa-mir-1266	MI0006403	chr15	52569314	52569397	-	MYO5C	NM_018728	chr15	52484514	52587995	-	1.27894	0.000309442	1.21621	0.00147437	0.761383	7.26522e-05
hsa-miR-1276	1.03817	0.962874	1.86288	0.070768	2.09665	0.0236604	hsa-mir-1276	MI0006416	chr15	86313727	86313809	-	KLHL25	NM_022480	chr15	86302558	86338189	-	0.880327	0.181691	1.00775	0.940083	0.899365	0.23305
hsa-miR-1277-3p	1.76872	0.720598	0.543724	0.192534	0.488281	0.119963	hsa-mir-1277	MI0006419	chrX	117520357	117520434	+	WDR44	NM_001184965	chrX	117480035	117583923	+	1.06616	0.208598	1.09556	0.0649033	1.16304	0.00420592
hsa-miR-1278	0.756374	0.912621	1.08611	0.890434	1.48554	0.347564	hsa-mir-1278	MI0006425	chr1	193105633	193105713	+	CDC73	NM_024529	chr1	193091087	193223942	+	1.14307	0.0302993	1.23074	0.00166603	1.04457	0.439211
hsa-miR-128-3p	0.873525	0.955522	0.81873	0.551329	0.87839	0.709923	hsa-mir-128-1	MI0000447	chr2	136422967	136423048	+	R3HDM1	NM_015361	chr2	136289082	136482839	+	0.868763	0.0181768	0.777884	0.000239675	0.790038	0.000334425
hsa-miR-1285-3p	1.37557	0.904641	2.02267	0.0532579	1.35936	0.434835	hsa-mir-1285-1	MI0006346	chr7	91833329	91833412	-	KRIT1	NM_194455	chr7	91828282	91875414	-	0.948642	0.240031	0.961285	0.359034	0.856641	0.00140527
hsa-miR-1287-5p	1.10581	0.962874	1.43011	0.241242	1.48188	0.192276	hsa-mir-1287	MI0006349	chr10	100154975	100155064	-	PYROXD2	NM_032709	chr10	100143321	100174978	-	1.03622	0.576968	1.29419	0.000343841	1.35518	6.30278e-05
hsa-miR-1291	1.12793	0.962874	2.03178	0.110478	1.95251	0.136718	hsa-mir-1291	MI0006353	chr12	49048227	49048313	-	KANSL2	NM_017822	chr12	49046994	49076035	-	0.898258	0.0451174	0.841556	0.00244577	0.798572	0.000246344
hsa-miR-1293	0.897767	0.962874	0.962659	0.941995	1.06099	0.897371	hsa-mir-1293	MI0006355	chr12	50627925	50627995	-	LIMA1	NM_001113546	chr12	50569562	50677353	-	0.6764	6.5561e-05	0.716357	0.000191668	1.07043	0.324507
hsa-miR-1296-5p	0.809295	0.924154	0.688591	0.368481	0.557181	0.136811	hsa-mir-1296	MI0003780	chr10	65132717	65132808	-	JMJD1C	NM_032776	chr10	64926987	65225722	-	1.35316	1.35263e-05	1.52033	3.35799e-07	1.58546	8.18213e-08
hsa-miR-1301-3p	1.12163	0.962874	0.765942	0.441263	0.601694	0.102411	hsa-mir-1301	MI0003815	chr2	25551509	25551590	-	DNMT3A	NM_175629	chr2	25455829	25565459	-	0.994038	0.917462	1.02028	0.697729	1.00639	0.901239
hsa-miR-1306-3p	0.566738	0.801004	0.971511	0.956869	1.01618	0.98155	hsa-mir-1306	MI0006443	chr22	20073581	20073665	+	DGCR8	NM_022720	chr22	20067754	20099400	+	0.914095	0.116574	0.914112	0.10192	0.731845	2.54159e-05
hsa-miR-1307-3p	0.836014	0.924154	0.928072	0.866274	0.837675	0.61467	hsa-mir-1307	MI0006444	chr10	105154010	105154158	-	USMG5	NM_001206427	chr10	105148808	105156270	-	0.941544	0.250018	0.826379	0.00110024	1.0861	0.0936112
hsa-miR-1343-3p	1.33472	0.904641	1.41085	0.404577	1.81762	0.107181	hsa-mir-1343	MI0017320	chr11	34963384	34963467	+	PDHX	NM_001135024	chr11	34937676	35017675	+	0.87172	0.0182177	0.933215	0.194163	1.19688	0.00235376
hsa-miR-140-3p	1.11422	0.962874	2.20805	0.0169491	2.00653	0.0272748	hsa-mir-140	MI0000456	chr16	69966984	69967083	+	WWP2	NM_007014	chr16	69796273	69975643	+	0.900452	0.101228	0.983562	0.798018	1.3563	9.091e-05
hsa-miR-140-5p	1.30787	0.883852	1.11999	0.769456	1.02028	0.963457	hsa-mir-140	MI0000456	chr16	69966984	69967083	+	WWP2	NM_007014	chr16	69796273	69975643	+	0.900452	0.101228	0.983562	0.798018	1.3563	9.091e-05
hsa-miR-148b-3p	1.18253	0.924154	1.3274	0.39045	1.01228	0.98155	hsa-mir-148b	MI0000811	chr12	54731000	54731098	+	COPZ1	NM_016057	chr12	54718910	54745633	+	0.766664	5.64314e-05	0.751849	1.97387e-05	0.885058	0.0131541
hsa-miR-148b-5p	1.03606	0.962874	1.07776	0.853118	1.16338	0.649884	hsa-mir-148b	MI0000811	chr12	54731000	54731098	+	COPZ1	NM_016057	chr12	54718910	54745633	+	0.766664	5.64314e-05	0.751849	1.97387e-05	0.885058	0.0131541
hsa-miR-149-5p	0.903265	0.962874	1.09048	0.827379	0.835635	0.590033	hsa-mir-149	MI0000478	chr2	241395418	241395506	+	GPC1	NM_002081	chr2	241375114	241407495	+	0.951237	0.421163	0.964946	0.546225	1.07662	0.191955
hsa-miR-149-3p	0.664522	0.720598	0.629854	0.139885	0.242666	7.50922e-07	hsa-mir-149	MI0000478	chr2	241395418	241395506	+	GPC1	NM_002081	chr2	241375114	241407495	+	0.951237	0.421163	0.964946	0.546225	1.07662	0.191955
hsa-miR-151a-3p	1.3541	0.904641	2.46938	0.0144764	2.33903	0.0168795	hsa-mir-151a	MI0000809	chr8	141742663	141742752	-	PTK2	NM_005607	chr8	141668480	142011412	-	1.08442	0.0624525	1.2538	4.7768e-05	1.26761	2.35843e-05
hsa-miR-151a-5p	1.0713	0.962874	0.757755	0.413795	0.680882	0.225002	hsa-mir-151a	MI0000809	chr8	141742663	141742752	-	PTK2	NM_005607	chr8	141668480	142011412	-	1.08442	0.0624525	1.2538	4.7768e-05	1.26761	2.35843e-05
hsa-miR-152-3p	1.22345	0.904641	1.67913	0.0945283	1.5228	0.177058	hsa-mir-152	MI0000462	chr17	46114527	46114613	-	COPZ2	NM_016429	chr17	46103532	46115152	-	0.927949	0.265377	0.965044	0.586118	1.10337	0.117327
hsa-miR-15a-5p	0.92359	0.962874	0.89226	0.755636	0.918516	0.816337	hsa-mir-15a	MI0000069	chr13	50623255	50623337	-	DLEU2	NR_002612	chr13	50556687	50699677	-	0.905132	0.216738	1.01348	0.872531	1.01072	0.894528
hsa-miR-15b-5p	1.40562	0.86171	0.781786	0.502684	0.901617	0.803129	hsa-mir-15b	MI0000438	chr3	160122376	160122473	+	SMC4	NM_001002800	chr3	160117429	160152741	+	1.21398	0.00121142	1.283	0.000111389	1.07889	0.119892
hsa-miR-15b-3p	0.916095	0.962874	0.315305	0.00395237	0.355534	0.00747663	hsa-mir-15b	MI0000438	chr3	160122376	160122473	+	SMC4	NM_001002800	chr3	160117429	160152741	+	1.21398	0.00121142	1.283	0.000111389	1.07889	0.119892
hsa-miR-16-1-3p	1.32799	0.904641	0.668009	0.286955	0.456831	0.0283993	hsa-mir-16-1	MI0000070	chr13	50623109	50623197	-	DLEU2	NR_002612	chr13	50556687	50699677	-	0.905132	0.216738	1.01348	0.872531	1.01072	0.894528
hsa-miR-16-2-3p	1.05226	0.962874	0.787041	0.537007	0.832604	0.642536	hsa-mir-16-2	MI0000115	chr3	160122533	160122613	+	SMC4	NM_001002800	chr3	160117429	160152741	+	1.21398	0.00121142	1.283	0.000111389	1.07889	0.119892
hsa-miR-185-5p	1.05698	0.962874	0.62561	0.170859	0.525413	0.046253	hsa-mir-185	MI0000482	chr22	20020662	20020743	+	C22orf25	NM_152906	chr22	20008630	20053447	+	0.891523	0.0548762	0.838549	0.00473014	0.744049	5.89548e-05
hsa-miR-185-3p	0.905879	0.962874	0.816141	0.588754	0.640032	0.177058	hsa-mir-185	MI0000482	chr22	20020662	20020743	+	C22orf25	NM_152906	chr22	20008630	20053447	+	0.891523	0.0548762	0.838549	0.00473014	0.744049	5.89548e-05
hsa-miR-188-5p	0.802368	0.904641	1.28258	0.452754	1.08312	0.845335	hsa-mir-188	MI0000484	chrX	49768109	49768194	+	CLCN5	NM_001127899	chrX	49687224	49863892	+	0.986484	0.829568	1.06827	0.22399	1.09831	0.081648
hsa-miR-190-5p	1.04132	0.962874	0.737779	0.34676	0.671799	0.192835	hsa-mir-190a	MI0000486	chr15	63116156	63116240	+	TLN2	NM_015059	chr15	62939509	63136829	+	0.566925	1.50667e-07	0.487277	8.59997e-09	0.316583	4.91598e-11
hsa-miR-1908-5p	1.42039	0.904641	0.549086	0.234621	0.600684	0.316951	hsa-mir-1908	MI0008329	chr11	61582633	61582712	-	FADS1	NM_013402	chr11	61567096	61584529	-	1.5136	2.35174e-06	1.42202	7.5352e-06	1.46899	2.26566e-06
hsa-miR-1911-5p	1.35662	0.866492	1.57609	0.157841	1.81873	0.0481541	hsa-mir-1911	MI0008332	chrX	113997744	113997823	+	HTR2C	NM_000868	chrX	113818550	114144624	+	1.29712	0.00206186	1.55296	1.64652e-05	1.46665	4.80037e-05
hsa-miR-1914-3p	0.736606	0.904641	0.700242	0.405102	1.16295	0.740318	hsa-mir-1914	MI0008335	chr20	62572818	62572897	-	UCKL1	NM_017859	chr20	62571181	62587800	-	1.1353	0.032555	1.38991	2.24009e-05	1.35521	3.7306e-05
hsa-miR-1915-3p	0.923901	0.962874	0.977385	0.962626	0.681674	0.419405	hsa-mir-1915	MI0008336	chr10	21785491	21785570	-	C10orf114	NM_001010911	chr10	21783420	21786213	-	0.960986	0.53838	0.876275	0.0325795	0.820887	0.00274574
hsa-miR-2110	1.39198	0.866492	0.779937	0.49367	0.510599	0.0294752	hsa-mir-2110	MI0010629	chr10	115933864	115933938	-	C10orf118	NM_018017	chr10	115881973	115934364	-	1.02675	0.771761	0.902079	0.19801	1.09657	0.23869
hsa-miR-218-5p	1.28061	0.904641	0.9977	0.997212	0.746731	0.462942	hsa-mir-218-1	MI0000294	chr4	20529898	20530007	+	SLIT2	NM_004787	chr4	20255234	20620788	+	0.849209	0.00438191	1.01885	0.722615	1.03008	0.549505
hsa-miR-224-5p	0.714983	0.904641	0.844304	0.722849	0.491578	0.0792701	hsa-mir-224	MI0000301	chrX	151127050	151127130	-	GABRE	NM_004961	chrX	151121595	151143151	-	1.01262	0.829113	0.969444	0.542891	0.994556	0.916362
hsa-miR-2276-3p	1.04448	0.962874	1.2828	0.492454	1.37157	0.340263	hsa-mir-2276	MI0011282	chr13	24736555	24736643	+	SPATA13	NM_001166271	chr13	24734860	24881212	+	0.669358	0.000134997	0.792599	0.00681	0.973446	0.735635
hsa-miR-2277-3p	1.40974	0.904641	1.42499	0.44264	1.15744	0.788735	hsa-mir-2277	MI0011284	chr5	92956402	92956494	-	FAM172A	NM_001163418	chr5	92953430	93447404	-	1.39842	1.78643e-05	1.29964	0.000120567	1.37748	1.40838e-05
hsa-miR-2277-5p	1.39946	0.866492	1.33757	0.44264	1.45658	0.28268	hsa-mir-2277	MI0011284	chr5	92956402	92956494	-	FAM172A	NM_001163418	chr5	92953430	93447404	-	1.39842	1.78643e-05	1.29964	0.000120567	1.37748	1.40838e-05
hsa-miR-2278	0.886309	0.962874	0.739726	0.441263	0.849017	0.696182	hsa-mir-2278	MI0011285	chr9	97572244	97572339	+	C9orf3	NM_032823	chr9	97488950	97849500	+	0.775148	0.000197029	0.860236	0.00786429	0.850593	0.00427469
hsa-miR-23b-3p	0.777252	0.904641	0.584554	0.0750129	0.793225	0.474348	hsa-mir-23b	MI0000439	chr9	97847490	97847586	+	C9orf3	NM_032823	chr9	97488950	97849500	+	0.775148	0.000197029	0.860236	0.00786429	0.850593	0.00427469
hsa-miR-23b-5p	0.463653	0.0593501	0.42971	0.00395237	0.426667	0.0026496	hsa-mir-23b	MI0000439	chr9	97847490	97847586	+	C9orf3	NM_032823	chr9	97488950	97849500	+	0.775148	0.000197029	0.860236	0.00786429	0.850593	0.00427469
hsa-miR-23c	0.59617	0.801004	0.590843	0.242323	0.990813	0.988207	hsa-mir-23c	MI0016010	chrX	20035206	20035305	-	MAP7D2	NM_152780	chrX	20024830	20135114	-	2.36231	6.08936e-08	1.74759	2.70293e-06	1.72224	2.54153e-06
hsa-miR-24-3p	1.22155	0.904641	0.898864	0.798901	1.07968	0.857475	hsa-mir-24-1	MI0000080	chr9	97848303	97848370	+	C9orf3	NM_032823	chr9	97488950	97849500	+	0.775148	0.000197029	0.860236	0.00786429	0.850593	0.00427469
hsa-miR-24-1-5p	1.15525	0.962874	0.377443	0.0121706	0.530068	0.0937475	hsa-mir-24-1	MI0000080	chr9	97848303	97848370	+	C9orf3	NM_032823	chr9	97488950	97849500	+	0.775148	0.000197029	0.860236	0.00786429	0.850593	0.00427469
hsa-miR-25-3p	1.08065	0.962874	1.39862	0.257809	1.40803	0.241545	hsa-mir-25	MI0000082	chr7	99691183	99691266	-	MCM7	NM_005916	chr7	99690403	99699427	-	1.03614	0.456093	0.825507	0.0003957	0.6474	9.5405e-08
hsa-miR-25-5p	1.35843	0.904641	0.50169	0.0727392	0.246098	0.0001	hsa-mir-25	MI0000082	chr7	99691183	99691266	-	MCM7	NM_005916	chr7	99690403	99699427	-	1.03614	0.456093	0.825507	0.0003957	0.6474	9.5405e-08
hsa-miR-26a-2-3p	1.42141	0.866492	0.93912	0.916071	1.28344	0.548664	hsa-mir-26a-2	MI0000750	chr12	58218392	58218475	-	CTDSP2	NM_005730	chr12	58213709	58240747	-	1.33285	1.08736e-05	1.52585	1.50735e-07	1.24321	7.87258e-05
hsa-miR-26b-5p	1.25253	0.904641	0.783387	0.490346	0.854619	0.66641	hsa-mir-26b	MI0000084	chr2	219267369	219267445	+	CTDSP1	NM_001206878	chr2	219263060	219270664	+	1.4228	6.72251e-07	1.46916	1.74899e-07	1.43591	2.08967e-07
hsa-miR-26b-3p	0.996683	0.993488	1.50338	0.186563	1.68094	0.0836546	hsa-mir-26b	MI0000084	chr2	219267369	219267445	+	CTDSP1	NM_001206878	chr2	219263060	219270664	+	1.4228	6.72251e-07	1.46916	1.74899e-07	1.43591	2.08967e-07
hsa-miR-27b-3p	1.07531	0.962874	1.20382	0.575596	1.30438	0.380144	hsa-mir-27b	MI0000440	chr9	97847727	97847823	+	C9orf3	NM_032823	chr9	97488950	97849500	+	0.775148	0.000197029	0.860236	0.00786429	0.850593	0.00427469
hsa-miR-27b-5p	0.634214	0.618581	0.682578	0.207363	0.669937	0.180279	hsa-mir-27b	MI0000440	chr9	97847727	97847823	+	C9orf3	NM_032823	chr9	97488950	97849500	+	0.775148	0.000197029	0.860236	0.00786429	0.850593	0.00427469
hsa-miR-28-3p	0.972322	0.977369	2.15245	0.0214416	2.0395	0.0254537	hsa-mir-28	MI0000086	chr3	188406569	188406654	+	LPP	NM_001167672	chr3	187871662	188608460	+	1.11002	0.213415	1.25275	0.00908408	1.48143	0.000108246
hsa-miR-28-5p	1.15557	0.955522	0.896726	0.799762	0.874286	0.722043	hsa-mir-28	MI0000086	chr3	188406569	188406654	+	LPP	NM_001167672	chr3	187871662	188608460	+	1.11002	0.213415	1.25275	0.00908408	1.48143	0.000108246
hsa-miR-301a-3p	0.653102	0.801004	0.474945	0.0457395	0.583636	0.146079	hsa-mir-301a	MI0000745	chr17	57228497	57228582	-	SKA2	NM_182620	chr17	57187307	57232800	-	0.97652	0.716128	1.13859	0.0313886	1.16949	0.0104567
hsa-miR-3064-5p	0.739729	0.903685	0.987964	0.979129	0.922843	0.863562	hsa-mir-3064	MI0017375	chr17	62496892	62496957	-	DDX5	NM_004396	chr17	62494373	62502484	-	0.527999	1.12461e-08	0.536036	8.53149e-09	0.439355	3.08313e-10
hsa-miR-30c-5p	0.627031	0.634757	0.964884	0.943421	1.40348	0.299163	hsa-mir-30c-1	MI0000736	chr1	41222956	41223044	+	NFYC	NM_001142589	chr1	41157241	41237275	+	0.965683	0.557258	0.936505	0.229881	0.934152	0.202231
hsa-miR-30c-1-3p	1.03121	0.977249	1.29688	0.50313	0.804437	0.599071	hsa-mir-30c-1	MI0000736	chr1	41222956	41223044	+	NFYC	NM_001142589	chr1	41157241	41237275	+	0.965683	0.557258	0.936505	0.229881	0.934152	0.202231
hsa-miR-30e-5p	1.18232	0.924154	1.58934	0.117913	1.97022	0.0168795	hsa-mir-30e	MI0000749	chr1	41220027	41220118	+	NFYC	NM_001142589	chr1	41157241	41237275	+	0.965683	0.557258	0.936505	0.229881	0.934152	0.202231
hsa-miR-30e-3p	1.26416	0.904641	2.00204	0.0333089	2.35342	0.00514691	hsa-mir-30e	MI0000749	chr1	41220027	41220118	+	NFYC	NM_001142589	chr1	41157241	41237275	+	0.965683	0.557258	0.936505	0.229881	0.934152	0.202231
hsa-miR-3127-3p	0.945147	0.962874	1.60997	0.206309	2.08555	0.0359905	hsa-mir-3127	MI0014144	chr2	97464015	97464090	+	CNNM4	NM_020184	chr2	97426638	97477628	+	0.916408	0.0881705	0.927454	0.123123	0.950384	0.283965
hsa-miR-3127-5p	0.745854	0.904641	1.02542	0.956869	1.1123	0.836435	hsa-mir-3127	MI0014144	chr2	97464015	97464090	+	CNNM4	NM_020184	chr2	97426638	97477628	+	0.916408	0.0881705	0.927454	0.123123	0.950384	0.283965
hsa-miR-3140-3p	1.1346	0.962874	2.17024	0.0492371	2.31476	0.0254537	hsa-mir-3140	MI0014163	chr4	153410479	153410568	-	FBXW7	NM_033632	chr4	153242409	153456185	-	0.816346	0.000506875	0.859568	0.00360373	0.909094	0.0420321
hsa-miR-3158-3p	2.19292	0.0593501	3.29042	3.1927e-05	2.64803	0.000729738	hsa-mir-3158-1	MI0014186	chr10	103361174	103361254	+	DPCD	NM_015448	chr10	103348088	103369410	+	2.46713	2.11038e-09	2.06185	1.12875e-08	2.04874	7.20917e-09
hsa-miR-3164	1.3869	0.904641	2.09722	0.0727392	2.7042	0.00970491	hsa-mir-3164	MI0014194	chr11	68850644	68850726	+	TPCN2	NM_139075	chr11	68816349	68858072	+	0.950507	0.422557	0.765244	0.000270315	0.528433	3.51196e-08
hsa-miR-3176	1.12259	0.962874	1.71812	0.094392	1.594	0.150505	hsa-mir-3176	MI0014210	chr16	593277	593366	+	SOLH	NM_005632	chr16	577855	604636	+	0.89269	0.0873551	0.85568	0.0189385	0.925484	0.209392
hsa-miR-3177-3p	1.12973	0.962874	1.0631	0.890434	1.03464	0.93475	hsa-mir-3177	MI0014211	chr16	1784986	1785067	+	MAPK8IP3	NM_015133	chr16	1756220	1820318	+	1.06015	0.305478	1.25863	0.000461199	1.58872	4.07094e-07
hsa-miR-3192-5p	1.11392	0.962874	1.06465	0.916071	1.13288	0.803129	hsa-mir-3192	MI0014237	chr20	18451259	18451335	+	POLR3F	NM_006466	chr20	18448032	18465286	+	0.72753	8.37128e-05	0.733028	7.30112e-05	0.721754	3.62382e-05
hsa-miR-3198	0.858294	0.962874	1.11563	0.887539	0.719814	0.591025	hsa-mir-3198-2	MI0017335	chr12	54625181	54625260	-	CBX5	NM_012117	chr12	54624730	54673915	-	1.16839	0.00727747	1.07032	0.187228	0.814376	0.000654322
hsa-miR-32-5p	1.33407	0.877037	1.06592	0.890434	0.844819	0.649884	hsa-mir-32	MI0000090	chr9	111808509	111808578	-	TMEM245	NM_032012	chr9	111777414	111882225	-	1.07043	0.312608	1.20014	0.00821667	1.41312	4.2649e-05
hsa-miR-32-3p	0.856968	0.955522	0.481169	0.036494	0.330781	0.000822847	hsa-mir-32	MI0000090	chr9	111808509	111808578	-	TMEM245	NM_032012	chr9	111777414	111882225	-	1.07043	0.312608	1.20014	0.00821667	1.41312	4.2649e-05
hsa-miR-3200-3p	0.760389	0.904641	0.631072	0.206309	0.654523	0.241545	hsa-mir-3200	MI0014249	chr22	31127544	31127628	+	OSBP2	NM_030758	chr22	31090792	31303811	+	0.908204	0.0613307	0.983615	0.747722	1.2084	0.000788133
hsa-miR-3200-5p	0.954458	0.962874	0.410727	0.0591033	0.398202	0.0436363	hsa-mir-3200	MI0014249	chr22	31127544	31127628	+	OSBP2	NM_030758	chr22	31090792	31303811	+	0.908204	0.0613307	0.983615	0.747722	1.2084	0.000788133
hsa-miR-326	0.603698	0.720598	0.587365	0.170859	0.699162	0.364369	hsa-mir-326	MI0000808	chr11	75046136	75046230	-	ARRB1	NM_004041	chr11	74971165	75062875	-	1.13661	0.0283151	1.16011	0.0106099	0.978154	0.684679
hsa-miR-33b-5p	1.26638	0.904641	2.8651	0.000508877	1.9666	0.0254537	hsa-mir-33b	MI0003646	chr17	17717150	17717245	-	SREBF1	NM_004176	chr17	17714662	17740325	-	1.31649	0.000261615	1.29547	0.000325873	1.60842	6.88328e-07
hsa-miR-33b-3p	0.944282	0.962874	0.620384	0.160432	1.14696	0.722043	hsa-mir-33b	MI0003646	chr17	17717150	17717245	-	SREBF1	NM_004176	chr17	17714662	17740325	-	1.31649	0.000261615	1.29547	0.000325873	1.60842	6.88328e-07
hsa-miR-340-5p	1.45531	0.840474	0.658463	0.228211	0.656901	0.225002	hsa-mir-340	MI0000802	chr5	179442303	179442397	-	RNF130	NM_018434	chr5	179382473	179499109	-	0.964171	0.568328	1.24432	0.00134116	1.48436	5.04386e-06
hsa-miR-340-3p	1.25179	0.904641	0.838404	0.634406	1.17158	0.664606	hsa-mir-340	MI0000802	chr5	179442303	179442397	-	RNF130	NM_018434	chr5	179382473	179499109	-	0.964171	0.568328	1.24432	0.00134116	1.48436	5.04386e-06
hsa-miR-342-3p	0.958812	0.962874	1.0873	0.868406	1.5111	0.241545	hsa-mir-342	MI0000805	chr14	100575992	100576090	+	EVL	NM_016337	chr14	100531750	100610573	+	0.939435	0.189575	1.09403	0.0528582	1.2168	0.000336108
hsa-miR-342-5p	0.844592	0.926177	0.980641	0.956869	0.969947	0.945882	hsa-mir-342	MI0000805	chr14	100575992	100576090	+	EVL	NM_016337	chr14	100531750	100610573	+	0.939435	0.189575	1.09403	0.0528582	1.2168	0.000336108
hsa-miR-3613-3p	0.522361	0.674291	0.408606	0.0637961	0.243941	0.00428906	hsa-mir-3613	MI0016003	chr13	50570551	50570637	-	DLEU2	NR_002612	chr13	50556687	50699677	-	0.905132	0.216738	1.01348	0.872531	1.01072	0.894528
hsa-miR-3613-5p	0.878933	0.962874	0.355467	0.002314	0.375506	0.00262268	hsa-mir-3613	MI0016003	chr13	50570551	50570637	-	DLEU2	NR_002612	chr13	50556687	50699677	-	0.905132	0.216738	1.01348	0.872531	1.01072	0.894528
hsa-miR-361-3p	1.137	0.962874	1.81696	0.0750129	1.84789	0.0597736	hsa-mir-361	MI0000760	chrX	85158641	85158712	-	CHM	NM_000390	chrX	85116184	85302566	-	1.18826	0.00846873	1.182	0.00827735	1.07684	0.19535
hsa-miR-3614-5p	1.50533	0.804362	2.43702	0.0104534	0.55641	0.130077	hsa-mir-3614	MI0016004	chr17	54968631	54968716	-	TRIM25	NM_005082	chr17	54965269	54991409	-	0.778644	0.0102241	0.78422	0.00986018	0.625955	4.85819e-05
hsa-miR-3615	1.24261	0.904641	2.06069	0.0214416	1.59741	0.137982	hsa-mir-3615	MI0016005	chr17	72744752	72744838	+	SLC9A3R1	NM_004252	chr17	72744750	72765499	+	0.980573	0.733912	0.883815	0.0216081	0.602128	9.14074e-08
hsa-miR-361-5p	0.888012	0.962874	0.783249	0.460114	0.926364	0.850226	hsa-mir-361	MI0000760	chrX	85158641	85158712	-	CHM	NM_000390	chrX	85116184	85302566	-	1.18826	0.00846873	1.182	0.00827735	1.07684	0.19535
hsa-miR-362-3p	0.830704	0.962874	0.61181	0.34676	0.65789	0.419405	hsa-mir-362	MI0000762	chrX	49773572	49773636	+	CLCN5	NM_001127899	chrX	49687224	49863892	+	0.986484	0.829568	1.06827	0.22399	1.09831	0.081648
hsa-miR-362-5p	0.951137	0.962874	0.624635	0.165371	0.470228	0.019065	hsa-mir-362	MI0000762	chrX	49773572	49773636	+	CLCN5	NM_001127899	chrX	49687224	49863892	+	0.986484	0.829568	1.06827	0.22399	1.09831	0.081648
hsa-miR-3653	0.905234	0.962874	1.37502	0.442036	1.23233	0.641227	hsa-mir-3653	MI0016053	chr22	29729147	29729256	-	AP1B1	NM_001127	chr22	29723668	29784572	-	0.607448	5.06715e-08	0.45748	3.55834e-10	0.394143	3.91176e-11
hsa-miR-3664-3p	1.05391	0.962874	0.924985	0.902961	0.821921	0.701652	hsa-mir-3664	MI0016065	chr11	70718375	70718473	-	SHANK2	NM_012309	chr11	70313960	70935808	-	0.763038	0.00029494	0.865587	0.0184209	0.948519	0.35352
hsa-miR-3691-5p	1.01779	0.988478	1.65628	0.182348	2.51259	0.00768189	hsa-mir-3691	MI0016092	chr6	5148467	5148556	-	LYRM4	NM_001164841	chr6	5108652	5261172	-	0.685874	0.000256209	0.690472	0.000220667	0.646094	3.8622e-05
hsa-miR-378a-3p	1.21753	0.924154	1.95604	0.0424803	1.61717	0.14413	hsa-mir-378a	MI0000786	chr5	149112388	149112453	+	PPARGC1B	NM_001172698	chr5	149109814	149234585	+	0.507675	5.76227e-07	0.470985	1.26058e-07	0.500062	1.83145e-07
hsa-miR-378a-5p	0.950441	0.962874	1.15393	0.755636	0.910207	0.850175	hsa-mir-378a	MI0000786	chr5	149112388	149112453	+	PPARGC1B	NM_001172698	chr5	149109814	149234585	+	0.507675	5.76227e-07	0.470985	1.26058e-07	0.500062	1.83145e-07
hsa-miR-3942-5p	1.82616	0.720598	2.27044	0.0654261	2.51652	0.027433	hsa-mir-3942	MI0016599	chr15	35664457	35664565	-	ATPBD4	NM_080650	chr15	35663169	35838404	-	0.759413	0.00024584	0.678331	7.07666e-06	0.727494	3.76034e-05
hsa-miR-3944-3p	1.23213	0.924154	1.48527	0.303087	1.4119	0.382639	hsa-mir-3944	MI0016601	chr10	135185060	135185167	-	ECHS1	NM_004092	chr10	135175986	135186908	-	1.06505	0.183271	0.864494	0.00383004	0.815971	0.000236356
hsa-miR-423-3p	0.934421	0.962874	0.799803	0.499857	0.926212	0.84761	hsa-mir-423	MI0001445	chr17	28444097	28444190	+	NSRP1	NM_001261467	chr17	28443824	28513493	+	0.852957	0.0127864	0.906509	0.092708	1.1459	0.0217558
hsa-miR-423-5p	1.3748	0.866492	0.84564	0.649767	0.56767	0.0608063	hsa-mir-423	MI0001445	chr17	28444097	28444190	+	NSRP1	NM_001261467	chr17	28443824	28513493	+	0.852957	0.0127864	0.906509	0.092708	1.1459	0.0217558
hsa-miR-4446-3p	1.06444	0.962874	0.979658	0.956869	1.10371	0.78813	hsa-mir-4446	MI0016789	chr3	113313723	113313789	+	SIDT1	NM_017699	chr3	113251217	113348422	+	1.45618	0.000385853	1.24895	0.0124619	0.984987	0.860438
hsa-miR-448	1.01071	0.990756	0.635558	0.211606	0.553829	0.102885	hsa-mir-448	MI0001637	chrX	114058017	114058127	+	HTR2C	NM_000868	chrX	113818550	114144624	+	1.29712	0.00206186	1.55296	1.64652e-05	1.46665	4.80037e-05
hsa-miR-4498	0.949041	0.962874	1.30955	0.551329	1.13496	0.803129	hsa-mir-4498	MI0016860	chr12	120593238	120593303	-	GCN1L1	NM_006836	chr12	120565013	120632513	-	0.893437	0.181554	0.722418	0.000712131	0.616607	1.58589e-05
hsa-miR-4504	2.1381	0.425708	2.96752	0.00663657	2.55373	0.019065	hsa-mir-4504	MI0016867	chr14	50766573	50766664	-	L2HGDH	NM_024884	chr14	50709151	50778947	-	0.955829	0.453567	0.837841	0.00431063	1.0061	0.916584
hsa-miR-4517	1.34041	0.877037	0.789278	0.527332	0.743008	0.395051	hsa-mir-4517	MI0016883	chr16	28969904	28969982	+	NFATC2IP	NM_032815	chr16	28962317	28977767	+	1.11232	0.0502925	1.03079	0.562592	0.951626	0.321506
hsa-miR-452-5p	1.19506	0.955522	1.12259	0.827379	1.22037	0.649884	hsa-mir-452	MI0001733	chrX	151128100	151128184	-	GABRE	NM_004961	chrX	151121595	151143151	-	1.01262	0.829113	0.969444	0.542891	0.994556	0.916362
hsa-miR-4525	1.68404	0.720598	0.828909	0.733784	0.720685	0.502677	hsa-mir-4525	MI0016892	chr17	80626109	80626183	-	RAB40B	NM_006822	chr17	80614942	80656598	-	1.02212	0.767362	1.13118	0.0629457	1.04529	0.490423
hsa-miR-4526	0.853361	0.962874	0.567177	0.207571	0.803985	0.664606	hsa-mir-4526	MI0016893	chr18	13611113	13611199	+	C18orf1	NM_181482	chr18	13218785	13652753	+	0.995093	0.96071	1.2846	0.00742735	1.24816	0.0134305
hsa-miR-454-3p	0.714481	0.866492	0.496369	0.0424803	0.625989	0.177058	hsa-mir-454	MI0003820	chr17	57215119	57215233	-	SKA2	NM_182620	chr17	57187307	57232800	-	0.97652	0.716128	1.13859	0.0313886	1.16949	0.0104567
hsa-miR-454-5p	0.815637	0.904641	0.804702	0.543753	1.24063	0.527889	hsa-mir-454	MI0003820	chr17	57215119	57215233	-	SKA2	NM_182620	chr17	57187307	57232800	-	0.97652	0.716128	1.13859	0.0313886	1.16949	0.0104567
hsa-miR-4640-5p	0.953203	0.962874	1.31667	0.514709	0.835565	0.694968	hsa-mir-4640	MI0017267	chr6	30858660	30858749	+	DDR1	NM_001954	chr6	30851860	30867933	+	1.40587	1.56499e-05	1.59513	4.35325e-07	1.42476	5.23971e-06
hsa-miR-4648	0.729691	0.904641	1.20315	0.720366	0.983627	0.98155	hsa-mir-4648	MI0017275	chr7	2566708	2566779	+	LFNG	NM_001166355	chr7	2552162	2568063	+	1.77716	2.74942e-08	2.02246	2.06842e-09	1.31606	1.90554e-05
hsa-miR-4668-5p	0.714066	0.904641	0.460409	0.0991752	0.805877	0.677144	hsa-mir-4668	MI0017298	chr9	114694380	114694449	+	UGCG	NM_003358	chr9	114659205	114695433	+	0.746072	3.86519e-05	0.849597	0.00352722	1.02989	0.55171
hsa-miR-4669	0.714104	0.904641	1.3201	0.511215	1.22552	0.646162	hsa-mir-4669	MI0017300	chr9	137271257	137271318	+	RXRA	NM_002957	chr9	137218315	137332431	+	1.19087	0.00337079	1.34634	2.98074e-05	1.2427	0.000402335
hsa-miR-4677-3p	1.04448	0.962874	1.50596	0.276833	1.72512	0.137151	hsa-mir-4677	MI0017308	chr1	243509478	243509557	+	SDCCAG8	NM_006642	chr1	243419306	243663393	+	1.29796	0.00183782	1.42023	0.000121143	1.35236	0.000363613
hsa-miR-4707-5p	0.516743	0.433317	0.677128	0.304674	0.452582	0.0268566	hsa-mir-4707	MI0017340	chr14	23426159	23426238	-	HAUS4	NM_017815	chr14	23415436	23426351	-	1.42803	6.80998e-06	1.40079	7.53725e-06	1.55822	3.21439e-07
hsa-miR-4714-3p	1.20189	0.955522	2.0266	0.0727392	1.3761	0.472351	hsa-mir-4714	MI0017348	chr15	99327655	99327731	+	IGF1R	NM_000875	chr15	99192760	99507759	+	1.15003	0.0776865	1.08288	0.290769	0.607427	5.91738e-06
hsa-miR-4742-3p	1.55228	0.820136	1.55851	0.264394	2.12378	0.0411985	hsa-mir-4742	MI0017380	chr1	224585929	224586013	-	WDR26	NM_001115113	chr1	224572844	224622001	-	1.13973	0.0797573	1.37099	0.000321433	1.78183	6.968e-07
hsa-miR-4745-5p	0.739473	0.904641	0.914581	0.872003	0.717733	0.414873	hsa-mir-4745	MI0017384	chr19	804940	805001	+	PTBP1	NM_031991	chr19	797391	812327	+	0.875349	0.0056249	0.885356	0.00796078	0.823285	0.000195849
hsa-miR-4760-5p	1.81528	0.298356	2.0373	0.0177003	1.79705	0.04062	hsa-mir-4760	MI0017401	chr21	41584279	41584358	-	DSCAM	NM_001389	chr21	41384342	42219039	-	1.21019	0.00169133	1.31	6.8628e-05	1.16642	0.00511538
hsa-miR-4798-5p	1.28644	0.924154	2.27821	0.0535876	2.05111	0.0910385	hsa-mir-4798	MI0017445	chr4	7312177	7312251	+	SORCS2	NM_020777	chr4	7194373	7744564	+	1.01662	0.815416	1.19421	0.00761847	1.15678	0.0205962
hsa-miR-4804-5p	0.874218	0.962874	0.806156	0.654435	0.682378	0.383163	hsa-mir-4804	MI0017452	chr5	72174418	72174490	+	TNPO1	NM_002270	chr5	72112417	72210215	+	1.01637	0.796048	0.887235	0.0344193	0.953348	0.37315
hsa-miR-484	1.13771	0.961103	1.03451	0.943421	0.990794	0.984987	hsa-mir-484	MI0002468	chr16	15737151	15737229	+	NDE1	NM_001143979	chr16	15737123	15820208	+	0.901619	0.0641686	0.985914	0.800847	1.0752	0.161421
hsa-miR-489-3p	1.42892	0.801004	1.04987	0.916071	1.11622	0.76535	hsa-mir-489	MI0003124	chr7	93113248	93113331	-	CALCR	NM_001742	chr7	93053798	93204042	-	1.04694	0.477345	0.763263	0.000284115	0.454855	4.86549e-09
hsa-miR-491-5p	1.41315	0.866492	1.00398	0.996183	1.38598	0.404857	hsa-mir-491	MI0003126	chr9	20716104	20716187	+	FOCAD	NM_017794	chr9	20658308	20995954	+	1.05795	0.334223	1.25081	0.000674527	1.13687	0.0227835
hsa-miR-500a-5p	0.846452	0.924154	0.964077	0.941995	1.16483	0.664606	hsa-mir-500a	MI0003184	chrX	49773039	49773122	+	CLCN5	NM_001127899	chrX	49687224	49863892	+	0.986484	0.829568	1.06827	0.22399	1.09831	0.081648
hsa-miR-500a-3p	0.821635	0.904641	0.969529	0.945109	0.933229	0.863562	hsa-mir-500a	MI0003184	chrX	49773039	49773122	+	CLCN5	NM_001127899	chrX	49687224	49863892	+	0.986484	0.829568	1.06827	0.22399	1.09831	0.081648
hsa-miR-500b-5p	0.847023	0.924154	0.963269	0.941995	1.16138	0.6714	hsa-mir-500b	MI0015903	chrX	49775280	49775358	+	CLCN5	NM_001127899	chrX	49687224	49863892	+	0.986484	0.829568	1.06827	0.22399	1.09831	0.081648
hsa-miR-501-3p	0.762373	0.877037	0.874629	0.720323	0.954828	0.906855	hsa-mir-501	MI0003185	chrX	49774330	49774413	+	CLCN5	NM_001127899	chrX	49687224	49863892	+	0.986484	0.829568	1.06827	0.22399	1.09831	0.081648
hsa-miR-501-5p	0.814634	0.904641	0.880137	0.733881	0.91356	0.814349	hsa-mir-501	MI0003185	chrX	49774330	49774413	+	CLCN5	NM_001127899	chrX	49687224	49863892	+	0.986484	0.829568	1.06827	0.22399	1.09831	0.081648
hsa-miR-502-3p	0.721126	0.847433	0.976849	0.956869	1.02049	0.963457	hsa-mir-502	MI0003186	chrX	49779206	49779291	+	CLCN5	NM_001127899	chrX	49687224	49863892	+	0.986484	0.829568	1.06827	0.22399	1.09831	0.081648
hsa-miR-502-5p	1.07395	0.962874	0.694538	0.368481	1.06916	0.897371	hsa-mir-502	MI0003186	chrX	49779206	49779291	+	CLCN5	NM_001127899	chrX	49687224	49863892	+	0.986484	0.829568	1.06827	0.22399	1.09831	0.081648
hsa-miR-503-5p	1.49208	0.720598	0.990319	0.981093	0.464104	0.0102235	hsa-mir-503	MI0003188	chrX	133680358	133680428	-	MGC16121	NR_024607	chrX	133677406	133680660	-	0.670827	5.31041e-05	0.602888	3.5977e-06	0.490456	7.28017e-08
hsa-miR-532-3p	0.839432	0.927542	0.665505	0.22988	0.805448	0.563038	hsa-mir-532	MI0003205	chrX	49767754	49767844	+	CLCN5	NM_001127899	chrX	49687224	49863892	+	0.986484	0.829568	1.06827	0.22399	1.09831	0.081648
hsa-miR-532-5p	0.95027	0.962874	1.77787	0.0972057	1.78836	0.0890483	hsa-mir-532	MI0003205	chrX	49767754	49767844	+	CLCN5	NM_001127899	chrX	49687224	49863892	+	0.986484	0.829568	1.06827	0.22399	1.09831	0.081648
hsa-miR-548d-3p	0.773687	0.924154	0.633482	0.341242	0.872513	0.803129	hsa-mir-548d-1	MI0003668	chr8	124360274	124360370	-	ATAD2	NM_014109	chr8	124332090	124408705	-	1.6336	8.09139e-06	1.23517	0.00644647	0.984582	0.830558
hsa-miR-548e-3p	1.4706	0.840957	0.720007	0.404577	0.647635	0.241545	hsa-mir-548e	MI0006344	chr10	112748684	112748771	+	SHOC2	NM_007373	chr10	112679300	112773425	+	0.831285	0.0121452	0.86942	0.0409751	0.959238	0.527351
hsa-miR-548h-5p	1.24145	0.95191	1.45865	0.413795	1.6164	0.262244	hsa-mir-548h-3	MI0006413	chr17	13446846	13446963	-	HS3ST3A1	NM_006042	chr17	13399005	13505244	-	0.707537	2.43938e-05	0.681646	5.95751e-06	0.556418	5.16351e-08
hsa-miR-548j-5p	1.11043	0.962874	1.16237	0.711543	1.29097	0.462942	hsa-mir-548j	MI0006345	chr22	26951178	26951289	-	TPST2	NM_003595	chr22	26921713	26986089	-	0.797009	0.000299708	0.931451	0.147208	1.03835	0.432997
hsa-miR-548k	1.30052	0.904641	0.646755	0.210085	0.649945	0.218091	hsa-mir-548k	MI0006354	chr11	70130061	70130176	+	PPFIA1	NM_003626	chr11	70116805	70230607	+	0.82946	0.000652768	0.867591	0.0039489	1.06166	0.167233
hsa-miR-548l	1.04719	0.962874	0.804744	0.672816	1.17254	0.745919	hsa-mir-548l	MI0006361	chr11	94199661	94199746	-	MRE11A	NM_005591	chr11	94150468	94227040	-	1.25742	0.000480666	1.11342	0.0447475	1.0095	0.860637
hsa-miR-576-3p	1.34353	0.904641	1.90035	0.0727392	1.79523	0.0972312	hsa-mir-576	MI0003583	chr4	110409854	110409951	+	SEC24B	NM_006323	chr4	110354970	110461615	+	1.14551	0.00568494	1.18396	0.000936826	1.35943	2.92962e-06
hsa-miR-576-5p	1.23739	0.924154	1.15058	0.765213	1.47292	0.29152	hsa-mir-576	MI0003583	chr4	110409854	110409951	+	SEC24B	NM_006323	chr4	110354970	110461615	+	1.14551	0.00568494	1.18396	0.000936826	1.35943	2.92962e-06
hsa-miR-580-3p	0.928541	0.962874	1.21982	0.643372	1.55346	0.22428	hsa-mir-580	MI0003587	chr5	36147994	36148090	-	LMBRD2	NM_001007527	chr5	36103413	36152015	-	1.21766	0.00146208	0.912549	0.0802098	0.81866	0.000825753
hsa-miR-584-5p	1.08945	0.962874	1.44719	0.271744	1.46163	0.248661	hsa-mir-584	MI0003591	chr5	148441876	148441972	-	SH3TC2	NM_024577	chr5	148361712	148442737	-	1.08074	0.252268	1.01735	0.802158	1.12248	0.0717836
hsa-miR-590-3p	1.0909	0.962874	0.546656	0.0916456	0.618296	0.179236	hsa-mir-590	MI0003602	chr7	73605528	73605624	+	EIF4H	NM_031992	chr7	73588705	73611429	+	1.14248	0.00901975	1.10209	0.0386813	1.16664	0.00234799
hsa-miR-590-5p	0.916434	0.962874	0.668009	0.191638	0.794218	0.478402	hsa-mir-590	MI0003602	chr7	73605528	73605624	+	EIF4H	NM_031992	chr7	73588705	73611429	+	1.14248	0.00901975	1.10209	0.0386813	1.16664	0.00234799
hsa-miR-598-3p	1.23282	0.904641	1.4752	0.184473	1.38054	0.268714	hsa-mir-598	MI0003610	chr8	10892716	10892812	-	XKR6	NM_173683	chr8	10753656	11058875	-	0.988601	0.81062	1.04788	0.260735	1.00212	0.961748
hsa-miR-624-5p	1.01915	0.985002	0.963419	0.94838	1.2996	0.512394	hsa-mir-624	MI0003638	chr14	31483852	31483948	-	STRN3	NM_014574	chr14	31363004	31495607	-	1.20005	0.0238694	1.21927	0.0126173	1.54233	2.18704e-05
hsa-miR-627-5p	1.44414	0.847433	2.71863	0.00285651	2.29088	0.0117213	hsa-mir-627	MI0003641	chr15	42491768	42491864	-	VPS39	NM_015289	chr15	42450898	42500502	-	1.18505	0.0119007	1.17225	0.014199	1.15163	0.0236746
hsa-miR-629-5p	0.898261	0.962874	1.55486	0.178199	1.53417	0.182657	hsa-mir-629	MI0003643	chr15	70371711	70371807	-	TLE3	NM_005078	chr15	70340542	70390256	-	0.820414	0.0046512	0.937777	0.294403	1.09455	0.132139
hsa-miR-629-3p	0.767989	0.904641	0.690075	0.390929	0.995617	0.988485	hsa-mir-629	MI0003643	chr15	70371711	70371807	-	TLE3	NM_005078	chr15	70340542	70390256	-	0.820414	0.0046512	0.937777	0.294403	1.09455	0.132139
hsa-miR-636	0.661488	0.866492	0.873406	0.817652	0.835195	0.722043	hsa-miR-636	MI0003651	chr17	74732532	74732630	-	SFRS2	NR_036608	chr17	74730197	74733493	-	0.611411	7.93745e-06	0.562828	1.06567e-06	0.389569	4.45582e-09
hsa-miR-652-3p	1.05061	0.962874	1.22302	0.554696	1.25322	0.479296	hsa-mir-652	MI0003667	chrX	109298557	109298654	+	TMEM164	NM_017698	chrX	109245862	109421016	+	1.08465	0.175521	0.941985	0.298052	0.842893	0.00548566
hsa-miR-653-5p	0.935257	0.962874	0.964503	0.942094	0.954698	0.911415	hsa-mir-653	MI0003674	chr7	93112072	93112167	-	CALCR	NM_001742	chr7	93053798	93204042	-	1.04694	0.477345	0.763263	0.000284115	0.454855	4.86549e-09
hsa-miR-660-5p	0.915228	0.962874	0.761547	0.413795	0.657096	0.177058	hsa-mir-660	MI0003684	chrX	49777849	49777945	+	CLCN5	NM_001127899	chrX	49687224	49863892	+	0.986484	0.829568	1.06827	0.22399	1.09831	0.081648
hsa-miR-675-5p	0.90358	0.962874	0.487795	0.0782333	0.476479	0.0642269	hsa-mir-675	MI0005416	chr11	2017989	2018061	-	H19	NR_002196	chr11	2016405	2019065	-	2.0713	6.40594e-07	2.15625	2.28243e-07	2.26041	7.99661e-08
hsa-miR-675-3p	1.25323	0.904641	0.998758	0.9976	1.26388	0.472028	hsa-mir-675	MI0005416	chr11	2017989	2018061	-	H19	NR_002196	chr11	2016405	2019065	-	2.0713	6.40594e-07	2.15625	2.28243e-07	2.26041	7.99661e-08
hsa-miR-744-5p	0.84869	0.924154	0.675467	0.184473	0.728062	0.28268	hsa-mir-744	MI0005559	chr17	11985216	11985313	+	MAP2K4	NM_003010	chr17	11924134	12047051	+	0.830478	0.000548817	0.923692	0.069344	1.01242	0.777556
hsa-miR-744-3p	0.819825	0.924154	0.591248	0.121611	0.884231	0.758044	hsa-mir-744	MI0005559	chr17	11985216	11985313	+	MAP2K4	NM_003010	chr17	11924134	12047051	+	0.830478	0.000548817	0.923692	0.069344	1.01242	0.777556
hsa-miR-765	1.1902	0.955522	1.40809	0.392766	1.02195	0.970475	hsa-mir-765	MI0005116	chr1	156905923	156906036	-	ARHGEF11	NM_014784	chr1	156904631	157015162	-	0.86115	0.00923478	0.83969	0.00264426	0.814685	0.000653286
hsa-miR-877-5p	1.0186	0.983455	0.667314	0.171184	0.622325	0.0972312	hsa-mir-877	MI0005561	chr6	30552109	30552194	+	ABCF1	NM_001025091	chr6	30539169	30559309	+	0.788591	9.13697e-05	0.685304	6.68754e-07	0.610309	2.77653e-08
hsa-miR-93-5p	1.00874	0.990756	1.41501	0.279777	1.59204	0.137982	hsa-mir-93	MI0000095	chr7	99691391	99691470	-	MCM7	NM_005916	chr7	99690403	99699427	-	1.03614	0.456093	0.825507	0.0003957	0.6474	9.5405e-08
hsa-miR-93-3p	0.632228	0.720598	0.416289	0.016836	0.367527	0.00359973	hsa-mir-93	MI0000095	chr7	99691391	99691470	-	MCM7	NM_005916	chr7	99690403	99699427	-	1.03614	0.456093	0.825507	0.0003957	0.6474	9.5405e-08
hsa-miR-937-3p	1.20433	0.940718	1.91977	0.0727392	2.0911	0.0317764	hsa-mir-937	MI0005759	chr8	144895127	144895212	-	SCRIB	NM_015356	chr8	144873089	144897549	-	0.881379	0.0183166	0.882499	0.0159999	0.821482	0.000621371
hsa-miR-939-5p	0.790791	0.912621	0.857649	0.740225	0.609315	0.192835	hsa-mir-939	MI0005761	chr8	145619364	145619445	-	CPSF1	NM_013291	chr8	145618445	145634733	-	1.03863	0.457944	1.04091	0.401616	1.05472	0.248774
hsa-miR-942-5p	1.24717	0.904641	2.07965	0.016836	2.16248	0.00768189	hsa-mir-942	MI0005767	chr1	117637265	117637350	+	TTF2	NM_003594	chr1	117602948	117645491	+	0.943815	0.425394	0.760878	0.000701047	0.510949	8.61908e-08
hsa-miR-95-3p	2.2646	0.234008	1.17584	0.733881	1.07446	0.897371	hsa-mir-95	MI0000097	chr4	8007028	8007108	-	ABLIM2	NM_001130084	chr4	7967036	8160559	-	1.14811	0.0956265	1.11517	0.166898	0.851446	0.0427254
hsa-miR-98-5p	1.29262	0.904641	0.822242	0.60334	1.16958	0.677144	hsa-mir-98	MI0000100	chrX	53583184	53583302	-	HUWE1	NM_031407	chrX	53559056	53713697	-	1.19727	0.0531407	1.10701	0.246499	1.10867	0.228585
hsa-miR-99a-5p	1.08345	0.962874	1.17715	0.645609	1.02197	0.962016	hsa-mir-99a	MI0000101	chr21	17911409	17911489	+	LINC00478	NR_027790	chr21	17442841	17982094	+	0.771573	7.33002e-05	0.872571	0.00800669	0.81322	0.000309311
hsa-miR-99a-3p	0.760749	0.904641	1.45137	0.264394	1.07128	0.884606	hsa-mir-99a	MI0000101	chr21	17911409	17911489	+	LINC00478	NR_027790	chr21	17442841	17982094	+	0.771573	7.33002e-05	0.872571	0.00800669	0.81322	0.000309311

## Sheet: Camps_TableS6
Supplementary table 6
microRNA expression							Host gene expression
miRNAs	FC H16h	adj.p-val H16h	FC H32h	adj.p-val H32h	FC H48h	adj.p-val H48h	Gene_name	FC H16h	adj.p-val H16h	FC H32h	adj.p-val H32h	FC H48h	adj.p-val H48h
hsa-miR-106b-3p	1.10172	0.962874	2.14833	0.0293359	1.9416	0.0480034	MCM7	1.03614	0.456093	0.825507	0.0003957	0.6474	9.5405e-08
hsa-miR-140-3p	1.11422	0.962874	2.20805	0.0169491	2.00653	0.0272748	WWP2	0.900452	0.101228	0.983562	0.798018	1.3563	9.091e-05
hsa-miR-151a-3p	1.3541	0.904641	2.46938	0.0144764	2.33903	0.0168795	PTK2	1.08442	0.0624525	1.2538	4.7768e-05	1.26761	2.35843e-05
hsa-miR-28-3p	0.972322	0.977369	2.15245	0.0214416	2.0395	0.0254537	LPP	1.11002	0.213415	1.25275	0.00908408	1.48143	0.000108246
hsa-miR-30e-3p	1.26416	0.904641	2.00204	0.0333089	2.35342	0.00514691	NFYC	0.965683	0.557258	0.936505	0.229881	0.934152	0.202231
hsa-miR-3140-3p	1.1346	0.962874	2.17024	0.0492371	2.31476	0.0254537	FBXW7	0.816346	0.000506875	0.859568	0.00360373	0.909094	0.0420321
hsa-miR-3158-3p	2.19292	0.0593501	3.29042	3.1927e-05	2.64803	0.000729738	DPCD	2.46713	2.11038e-09	2.06185	1.12875e-08	2.04874	7.20917e-09
hsa-miR-33b-5p	1.26638	0.904641	2.8651	0.000508877	1.9666	0.0254537	SREBF1	1.31649	0.000261615	1.29547	0.000325873	1.60842	6.88328e-07
hsa-miR-4504	2.1381	0.425708	2.96752	0.00663657	2.55373	0.019065	L2HGDH	0.955829	0.453567	0.837841	0.00431063	1.0061	0.916584
hsa-miR-4760-5p	1.81528	0.298356	2.0373	0.0177003	1.79705	0.04062	DSCAM	1.21019	0.00169133	1.31	6.8628e-05	1.16642	0.00511538
hsa-miR-627-5p	1.44414	0.847433	2.71863	0.00285651	2.29088	0.0117213	VPS39	1.18505	0.0119007	1.17225	0.014199	1.15163	0.0236746
hsa-miR-942-5p	1.24717	0.904641	2.07965	0.016836	2.16248	0.00768189	TTF2	0.943815	0.425394	0.760878	0.000701047	0.510949	8.61908e-08
hsa-miR-15b-3p	0.916095	0.962874	0.315305	0.00395237	0.355534	0.00747663	SMC4	1.21398	0.00121142	1.283	0.000111389	1.07889	0.119892
hsa-miR-23b-5p	0.463653	0.0593501	0.42971	0.00395237	0.426667	0.0026496	C9orf3	0.775148	0.000197029	0.860236	0.00786429	0.850593	0.00427469
hsa-miR-32-3p	0.856968	0.955522	0.481169	0.036494	0.330781	0.000822847	TMEM245	1.07043	0.312608	1.20014	0.00821667	1.41312	4.2649e-05
hsa-miR-3613-5p	0.878933	0.962874	0.355467	0.002314	0.375506	0.00262268	DLEU2	0.905132	0.216738	1.01348	0.872531	1.01072	0.894528
hsa-miR-93-3p	0.632228	0.720598	0.416289	0.016836	0.367527	0.00359973	MCM7	1.03614	0.456093	0.825507	0.0003957	0.6474	9.5405e-08

## Sheet: Camps_TableS7
Supplementary table 7
GENE	FC H16h	adj.p-val H16h	FC H32h	adj.p-val H32h	FC H48h	adj.p-val H48h
ADAR	1.06053	0.523352	1.26561	0.0100999	1.02842	0.745692
ADARB1	0.833058	0.00105605	0.851487	0.00214123	0.84248	0.0011085
ARS2	0.902942	0.203482	0.811923	0.0111356	0.606562	6.98346e-06
DDX5	0.527999	1.12461e-08	0.536036	8.53149e-09	0.439355	3.08313e-10
DGCR8	0.914095	0.116574	0.914112	0.10192	0.731845	2.54159e-05
DICER1	0.806526	0.000192657	0.840206	0.000837005	0.757183	9.52218e-06
EIF2C1	1.13945	0.0139198	1.14644	0.00871717	1.05285	0.274026
EIF2C2	0.846585	0.00490878	0.944909	0.275013	0.84739	0.00348829
EIF2C3	1.00641	0.914051	0.956418	0.380123	0.902114	0.042237
EIF2C4	1.23911	0.000125514	1.45189	3.929e-07	1.50316	1.02898e-07
HNRPA1	1.25093	0.000131112	0.890146	0.0126707	0.680486	3.11733e-07
KHSRP	0.959382	0.509426	0.879574	0.0330838	0.853126	0.00959545
PRKRA	0.775332	0.00587955	0.829547	0.0273834	0.956701	0.584546
RAN	0.658074	4.22563e-07	0.593418	2.82795e-08	0.366396	2.88048e-11
RNASEN	1.13601	0.028155	1.06026	0.278313	0.960748	0.449959
TARBP1	0.92261	0.142087	0.778394	0.000170647	0.606103	1.29306e-07
TARBP2	0.945344	0.226186	0.817157	0.000261064	0.72372	2.19585e-06
TRIM32	1.31953	2.86043e-05	1.31383	2.23567e-05	1.15622	0.00367196
XPO5	0.651421	6.12155e-05	0.621628	1.5747e-05	0.512182	3.4753e-07

## Sheet: Camps_TableS8
Supplementary table 8
Gene	Forward primer (5'-> 3')	Reverse primer (5'-> 3')
AGO2	AGCCGTGCTTCTGCAAATAC	TCTGCACGTTCTTCATCTGC
AGO4	TATTCCAGCCCCTGCATATT	ACATCGTGTGCTGGGTATCA
DDX5	ACAAGAGCGTGACTGGGTTC	TGTGCCTGTTTTGGTACTGC
DICER	TGATGCGGCCACTAATAGAA	CTCTGACCTTCCCGTCGTAA
FBXW7 (F1 and R1)	GTTTGGGATGTGGAGACAGG	CTGATGCTTGTTGGGACCTT
FBXW7 (F2 and R2)	AAGGGAACCAACCCACTTTC	TCAGAGAGCCTCCAGTTCGT
MCM7 (F0 and R0)	CGAGAGGCTTGGGCTAGTAA	GACGGTGGCAAATATCACATC
MCM7 (F1 and R1)	ATGGCACTGAAGGACTACGC	CGTCCAGGTCCACATACAGA
MCM7 (F2 and R2)	CACGGGCTCTTTATTCTTCG	TCGTCCAGGTCCACATACAG
RAN	TGTTCCACACCAACAGAGGA	ACAATGGATTTCGCCTTCAC
RPL11	TGGGGAGAGTGGAGACAGAC	TCCCAAAACCAAAGTTTCCA
RPL30	CAGACAAGGCAAAGCGAAAT	TGGACACCAGTTTTAGCCAAC
RPS6	AGAAGATGATGTCCGCCAGT	TTGGTACGCTGCTTCTTCAG
TTF2	ATTTACCGAGTAGGGCAGCA	GGACTCTGAGGTCAGCCAAG
XPO5	AAGAGATGCTGGAGGAGCAA	TGCCCAGGTCTGTAAGCTCT

## Sheet: Camps_TableS9
Supplementary table 9
Study	Hua	Kulshreshtha	Hebert	Donker	Pulkkinen	Guimbellot	Wu	Bruning	Ho	Camps 16h	Camps 32h	Camps 48h	Camps HIF binding site
Cell type	CNE cells	HT-29, HCT-116, MCF-7, MDA-MB-231	HNSCC	Primary human cytotrophoblasts	HUVEC	HT-29	PASMC	Caco-2	HUVEC	MCF-7
Hypoxia conditions	20h, DFOM treatment	0-48h, 0.2% Oxygen	1-5h, 1-5% Oxygen	48h, 1% Oxygen	24h, 1% Oxygen	liquid-liquid interfase	24h, 1% Oxygen	0-48h, 1% Oxygen	24h, 1% Oxygen	0-48h, 1% Oxygen			DMOG treatment, 16h 0.5% Oxygen
Technology	spotted microarray	spotted microarray	spotted microarray	qPCR and Northern blot	qPCR	spotted microarray	qPCR	µParaflo chip	spotted microarray	NGS			ChIP-seq
Up-regulated microRNAs
hsa-let-7b-5p					up		up	up
hsa-let-7e-5p					up		up	up
hsa-let-7i-5p			up
hsa-miR-103a-3p		up					up
hsa-miR-106a-5p		up					up
hsa-miR-106b-5p							up
hsa-miR-107		up
hsa-miR-10a-5p							up					up
hsa-miR-1246								up			up	up
hsa-miR-125a-3p							up
hsa-miR-125a-5p					up	up	up					up
hsa-miR-125b-5p		up
hsa-miR-126-3p							up
hsa-miR-1275								up			down	down
hsa-miR-128-3p					up		up
hsa-miR-130a-3p							up
hsa-miR-130b-5p							up
hsa-miR-132-3p							up					up
hsa-miR-134-5p							up						HIF BS
hsa-miR-135b-5p							up
hsa-miR-137					up		up
hsa-miR-138-5p							up
hsa-miR-139-5p							up
hsa-miR-140-3p							up				up	up
hsa-miR-140-5p							up
hsa-miR-143-3p							up				up	up
hsa-miR-146b-5p							up					up	HIF BS
hsa-miR-148a-3p			up		up
hsa-miR-148b-3p			up
hsa-miR-151a-3p	up										up	up
hsa-miR-152-3p						up
hsa-miR-15a-3p							up
hsa-miR-15a-5p			up
hsa-miR-17-5p							up
hsa-miR-181a-3p		up			up	up
hsa-miR-181a-5p		up										up
hsa-miR-181c-5p		up					up						HIF BS
hsa-miR-188-5p	up					up
hsa-miR-18a-5p							up
hsa-miR-191-5p			up			up
hsa-miR-192-3p								up
hsa-miR-192-5p		up					up				up	up
hsa-miR-193b-3p						up
hsa-miR-198							up
hsa-miR-199a-5p					up		up
hsa-miR-199b-5p							up
hsa-miR-19b-3p							up				down	down
hsa-miR-200a-3p			up
hsa-miR-200b-3p						up
hsa-miR-204-5p					up		up
hsa-miR-206						up
hsa-miR-20a-3p							up				down
hsa-miR-210-3p	up	up	up		up	up	up	up	up	up	up	up	HIF BS
hsa-miR-212-3p							up
hsa-miR-214-3p			up		up
hsa-miR-215-5p								up			up	up
hsa-miR-21-5p		up					up
hsa-miR-221-3p							up
hsa-miR-221-5p							up				down	down
hsa-miR-223-3p							up
hsa-miR-23a-3p		up				up						up*	HIF BS
hsa-miR-23b-3p		up			up	up
hsa-miR-24-3p		up					up						HIF BS
hsa-miR-26a-5p		up				up	up
hsa-miR-27a-3p		up					up			up*	up*	up*	HIF BS
hsa-miR-27b-3p						up	up
hsa-miR-296-5p							up
hsa-miR-299-3p					up
hsa-miR-29a-5p							up
hsa-miR-29c-3p							up
hsa-miR-301a-3p							up				down		HIF BS
hsa-miR-301b							up
hsa-miR-302b-3p							up
hsa-miR-30a-3p					up
hsa-miR-30a-5p						up					up
hsa-miR-30c-5p					up	up
hsa-miR-30d-5p	up					up				up*	up	up	HIF BS
hsa-miR-335-5p					up		up
hsa-miR-337-5p							up
hsa-miR-339-3p							up
hsa-miR-339-5p						up
hsa-miR-342-3p					up		up						HIF BS
hsa-miR-34a-5p							up
hsa-miR-361-5p							up
hsa-miR-362-3p							up
hsa-miR-363-3p							up
hsa-miR-365a-3p							up
hsa-miR-369-5p							up
hsa-miR-373-3p			up
hsa-miR-374b-5p							up	up
hsa-miR-376a-5p							up
hsa-miR-376c-3p							up
hsa-miR-382-5p							up
hsa-miR-383-5p							up
hsa-miR-409-5p							up
hsa-miR-425-3p							up
hsa-miR-429			up
hsa-miR-431-5p							up
hsa-miR-433-3p							up
hsa-miR-452-3p						up
hsa-miR-454-3p							up				down		HIF BS
hsa-miR-454-5p							up						HIF BS
hsa-miR-455-3p							up				down	down
hsa-miR-455-5p							up
hsa-miR-487b-3p							up
hsa-miR-491-5p						up
hsa-miR-493-3p							up
hsa-miR-493-5p							up
hsa-miR-495-3p							up
hsa-miR-500a-5p							up
hsa-miR-512-5p						up
hsa-miR-539-5p							up
hsa-miR-563			up
hsa-miR-572			up
hsa-miR-579-5p							up
hsa-miR-589-5p							up
hsa-miR-597-3p							up
hsa-miR-618							up
hsa-miR-628-3p			up
hsa-miR-628-5p							up
hsa-miR-632							up
hsa-miR-637			up
hsa-miR-638								up
hsa-miR-642a-5p							up
hsa-miR-660-5p							up
hsa-miR-7-1-3p							up				down
hsa-miR-7-5p			up				up					down
hsa-miR-770-5p							up
hsa-miR-93-5p		up		up			up
hsa-miR-98-5p			up
New microRNAs reported to be up-regulated in this study
hsa-miR-1											up	up
hsa-miR-100-5p												up
hsa-miR-106b-3p											up	up
hsa-miR-1269a											up	up
hsa-miR-1276												up
hsa-miR-141-5p											up	up
hsa-miR-148a-5p												up
hsa-miR-181a-2-3p												up
hsa-miR-181c-3p											up	up	HIF BS
hsa-miR-182-5p												up
hsa-miR-1911-5p												up
hsa-miR-194-5p											up	up
hsa-miR-195-3p											up	up
hsa-miR-196a-3p												up
hsa-miR-203a											up	up
hsa-miR-203b-3p											up	up
hsa-miR-2355-3p												up
hsa-miR-24-2-5p											up*	up*	HIF BS
hsa-miR-27a-5p											up	up	HIF BS
hsa-miR-28-3p											up	up
hsa-miR-3065-3p											up	up
hsa-miR-30b-3p											up*	up*	HIF BS
hsa-miR-30d-3p										up*	up	up	HIF BS
hsa-miR-30e-3p											up	up
hsa-miR-3127-3p												up
hsa-miR-3140-3p											up	up
hsa-miR-3150b-3p											up
hsa-miR-3158-3p											up	up
hsa-miR-3164												up	HIF BS
hsa-miR-330-5p												up
hsa-miR-338-5p											up	up
hsa-miR-33b-5p											up	up
hsa-miR-3614-5p											up
hsa-miR-3615											up
hsa-miR-3619-3p											up	up
hsa-miR-3663-3p											up
hsa-miR-3677-3p											up	up
hsa-miR-3691-5p												up
hsa-miR-378c											up	up
hsa-miR-378d											up	up
hsa-miR-378i											up	up
hsa-miR-3913-5p											up	up
hsa-miR-3928-3p											up	up
hsa-miR-3934-5p												up
hsa-miR-3942-5p												up
hsa-miR-4435												up
hsa-miR-4504											up	up
hsa-miR-4742-3p												up
hsa-miR-4746-5p											up	up
hsa-miR-4760-5p											up	up
hsa-miR-4784											up
hsa-miR-548a-3p											up	up
hsa-miR-577												up
hsa-miR-627-5p											up	up
hsa-miR-92b-3p											up	up
hsa-miR-937-3p												up
hsa-miR-942-5p											up	up
hsa-miR-99b-5p											up	up
Contrasting regulation
hsa-let-7a-5p	down							up
hsa-let-7c-5p	down						up	up
hsa-let-7d-5p	down						up	up
hsa-let-7e-5p	down		up
hsa-let-7f-5p	down							up
hsa-let-7g-5p	down		up				up
hsa-miR-101-3p			down				up
hsa-miR-150-5p					up	down
hsa-miR-155-5p	up				up	down		up				up
hsa-miR-15b-5p	down						up
hsa-miR-16-5p	down				up		up
hsa-miR-181b-5p	up	up			up	down						up
hsa-miR-185-5p					up				down			down
hsa-miR-186-5p			down				up
hsa-miR-193b-5p								up	down
hsa-miR-195-5p		up	down				up
hsa-miR-19a-3p			down				up				down	down
hsa-miR-20a-5p	down				up		up
hsa-miR-20b-5p	down						up
hsa-miR-26b-5p	down	up			up		up	up					HIF BS
hsa-miR-29b-3p			down				up				down
hsa-miR-30b-5p	down	up	up		up						up*	up*	HIF BS
hsa-miR-340-5p							up		down
hsa-miR-494-3p							up		down			down	HIF BS
hsa-miR-498			up						down
hsa-miR-576-3p							up		down
Down-regulated microRNAs
hsa-miR-122-5p			down
hsa-miR-128-2-5p						down
hsa-miR-138-1-3p									down
hsa-miR-141-3p			down
hsa-miR-146b-3p									down
hsa-miR-181d-5p						down							HIF BS
hsa-miR-196a-5p						down						up
hsa-miR-196b-5p						down
hsa-miR-197-3p			down
hsa-miR-200a-5p						down
hsa-miR-216a-5p					down
hsa-miR-224-5p	down
hsa-miR-25-3p						down
hsa-miR-30e-5p			down									up
hsa-miR-320a			down
hsa-miR-373-5p						down
hsa-miR-374a-5p			down
hsa-miR-374b-3p									down
hsa-miR-378a-3p			down								up
hsa-miR-424-5p			down	down								down
hsa-miR-449a						down
hsa-miR-489-3p						down
hsa-miR-519e-5p						down
hsa-miR-92a-3p						down
hsa-miR-9-5p					down							up
hsa-miR-184									down		up
hsa-miR-302d-5p									down
hsa-miR-30c-2-3p									down			down
hsa-miR-32-3p									down		down	down
hsa-miR-490-3p									down
hsa-miR-492									down
hsa-miR-505-5p									down		down	down
hsa-miR-509-3-5p									down
hsa-miR-509-5p									down
hsa-miR-513a-5p									down
hsa-miR-516b-5p									down
hsa-miR-549a									down
hsa-miR-551b-3p									down
hsa-miR-583									down
hsa-miR-620									down
hsa-miR-625-5p									down
hsa-miR-658									down
hsa-miR-665									down
hsa-miR-765									down
hsa-miR-877-5p									down
hsa-miR-920									down
hsa-miR-921									down
hsa-miR-922									down
hsa-miR-939-5p									down
New microRNAs reported to be down-regulated in this study
hsa-let-7f-1-3p											down	down
hsa-let-7g-3p												down
hsa-miR-1257												down
hsa-miR-1260a											down	down
hsa-miR-1260b											down	down
hsa-miR-1283											down
hsa-miR-145-3p										down	down	down
hsa-miR-149-3p												down
hsa-miR-15b-3p											down	down
hsa-miR-16-1-3p												down
hsa-miR-193a-3p												down
hsa-miR-193a-5p												down
hsa-miR-19b-1-5p											down	down
hsa-miR-2110												down
hsa-miR-222-3p											up*	down
hsa-miR-222-5p										down	down	down
hsa-miR-22-3p											down	down
hsa-miR-22-5p												down
hsa-miR-23a-5p											down	down	HIF BS
hsa-miR-23b-5p											down	down
hsa-miR-24-1-5p											down
hsa-miR-25-5p												down
hsa-miR-296-3p											down	down
hsa-miR-29b-1-5p										down	down
hsa-miR-31-5p												down
hsa-miR-3200-5p												down
hsa-miR-33a-3p											down	down
hsa-miR-3613-3p												down
hsa-miR-3613-5p											down	down
hsa-miR-362-5p												down
hsa-miR-365a-5p												down
hsa-miR-424-3p											down	down
hsa-miR-4466											down	down
hsa-miR-4521										down	down	down
hsa-miR-4707-5p												down
hsa-miR-503-5p												down
hsa-miR-573											down	down
hsa-miR-589-3p											down
hsa-miR-92a-1-5p											down	down
hsa-miR-93-3p											down	down
hsa-miR-934												down
hsa-miR-940											down	down

## Sheet: Camps_TableS10
Supplementary table 10
GEO accession	Platform	Experiment	Cell Line	oxygen (%)	Time	FC	adj.p-val	FC	adj.p-val	FC	adj.p-val	FC	adj.p-val	FC	adj.p-val	FC	adj.p-val
						DICER1		DDX5		XPO5		RAN		EIF2C2		EIF2C4
GSE39042	hgu133plus2	Expression data from MDA-MB-231 cells exposed to hypoxia and/or paclitaxel or epirubicin	mammary gland/breast	not specified	16h	0.79664	0.015	0.965936	0.719	0.653836	0.001	0.763659	0.003	0.874179	0.111	1.11034	0.154
GSE28603	hgu133plus2	Expression data from human SGBS adipocytes under hypoxic conditions	human SGBS adipocytes	0.01	16h	0.781328	0.846	0.449378	0.119	0.951318	0.95	0.951318	0.948	1.2105	0.18	1.05702	0.88
GSE22469	hgu133a	Rhabdomyosarcoma cells (SJRH30) response to hypoxia: time course (6hr,12hr and 24hr)	muscle;bone marrow	0.01	24h	1.05336	0.49	0.883315	0.096	-	-	0.922103	0.193	-	-	1.00222	0.986
GSE12792	hgu133a	Renal Proximal Tube Epithelial Cells at 24h and 1% oxygen	Renal tubule epithelial cells	0.01	24h	0.981459	0.905	0.649319	0.039	-	-	0.626767	0.065	-	-	1.01748	0.924
GSE17353	hgu133plus2	Expression data from hypoxia exposed normal human esophageal epithelial cells	esophageal epithelial cells	0.01	24h	0.640824	0.00169	0.810003	0.077	0.91955	0.586	0.616426	0.0014	0.819037	0.048	1.14472	0.423
GSE34007	Agilent-014850 Whole Human Genome Microarray 4x44K G4112F	Hypoxia-induced modulation of gene expression in human adipocytes - A microarray study	human adipocytes	0.01	24h	0.804408	0.127	0.774319	0.344	0.79664	0.103	0.79664	0.05	1.22774	0.08	1.08523	0.653
GSE4086	hgu133plus2	Hypoxia responsive genes in human Burkitt’s lymphoma cell line, P493-6	B lymphocyte cell line P493-6	0.001	29h	0.942785	0.535	0.623301	0.0024	0.903127	0.296	1.04391	0.75	0.900626	0.52	0.949342	0.578
GSE45301	Illumina HumanHT-12 V3.0 expression beadchip	Hypoxia-responsive gene expression profile of U87 MG glioblastoma cells and their exosomes.	glioblastoma cells	0.01	48h	0.944747	0.565	0.673617	0.02	0.882703	0.2	0.737135	0.05	0.817902	0.16	1.00975	0.92
GSE36837	Affymetrix Human Exon 1.0 ST Array	Hypoxia effect on human umbilical vein endothelial cells - gene and exon expression	human umbilical vein endothelial cells	0.01	48h	0.987601	0.812	0.883928	0.05	1.07252	0.17	0.835667	0.03	1.37554	0.002	1.19499	0.03
GSE43608	hgu133plus2	Gene expression profile of HCT116 exposed to chronic hypoxia	Colon cancer cell line	0.01	72h	1.11111	0.522	1.07326	0.682	0.272627	0.0022	0.292397	0.00141	2.00973	0.0044	1.25006	0.21
GSE53012	hgu133plus2	Expression data from three human cancer cell lines (PC-3, SK-OV-3, WM793B) exposed to experimental cycling and chronic hypoxa in vitro	human prostate (PC-3)	0.01	72h	1.05702	0.605	0.973397	0.7607	0.608361	1.22e-05	0.639493	4.04e-06	0.86334	0.276	1.31312	0.0097
			human ovarian (SK-OV-3)	0.01	72h	0.823591	0.042	0.678772	1.33e-05	0.820742	0.04	1.06437	0.481	1.15509	0.312	1.01819	0.907
			human melanoma (WM793B)	0.01	72h	1.02456	0.87	0.73255	0.00019	0.684916	0.00039	0.626767	5.077e-06	1.1704	0.286	1.04608	0.773
